# Supplementary material
Source: PubMed Central journal article supplement (PMC3122156)

## Supporting Information-II

### **17(R),18(S)-Epoxyeicosatetraenoic Acid, A Potent Eicosapentaenoic Acid (EPA)-Derived Regulator of Cardiomyocyte Contraction: Structure-Activity Relationships and Stable Analogs**

John R. Falck,<sup>\*,†</sup> Gerd Wallukat,<sup>§</sup> Narendra Puli,<sup>†</sup> Mohan Goli,<sup>†</sup> Cosima Arnold,<sup>§</sup> Anne Konkel,<sup>§</sup> Michael Rothe,<sup>¶</sup> Robert Fischer,<sup>‡</sup> Dominik N. Müller,<sup>§</sup> and Wolf-Hagen Schunck<sup>\*,§</sup>

<sup>†</sup>*Department of Biochemistry, UT Southwestern, Dallas, TX 75390 USA, §Max Delbrueck Center for Molecular Medicine, Berlin, Germany, and <sup>‡</sup>Experimental and Clinical Research Center, Charité Medical Faculty, Berlin, Germany*

<sup>1</sup>H NMR & <sup>13</sup>C NMR Spectra

2-87

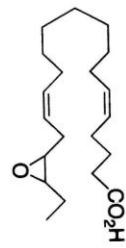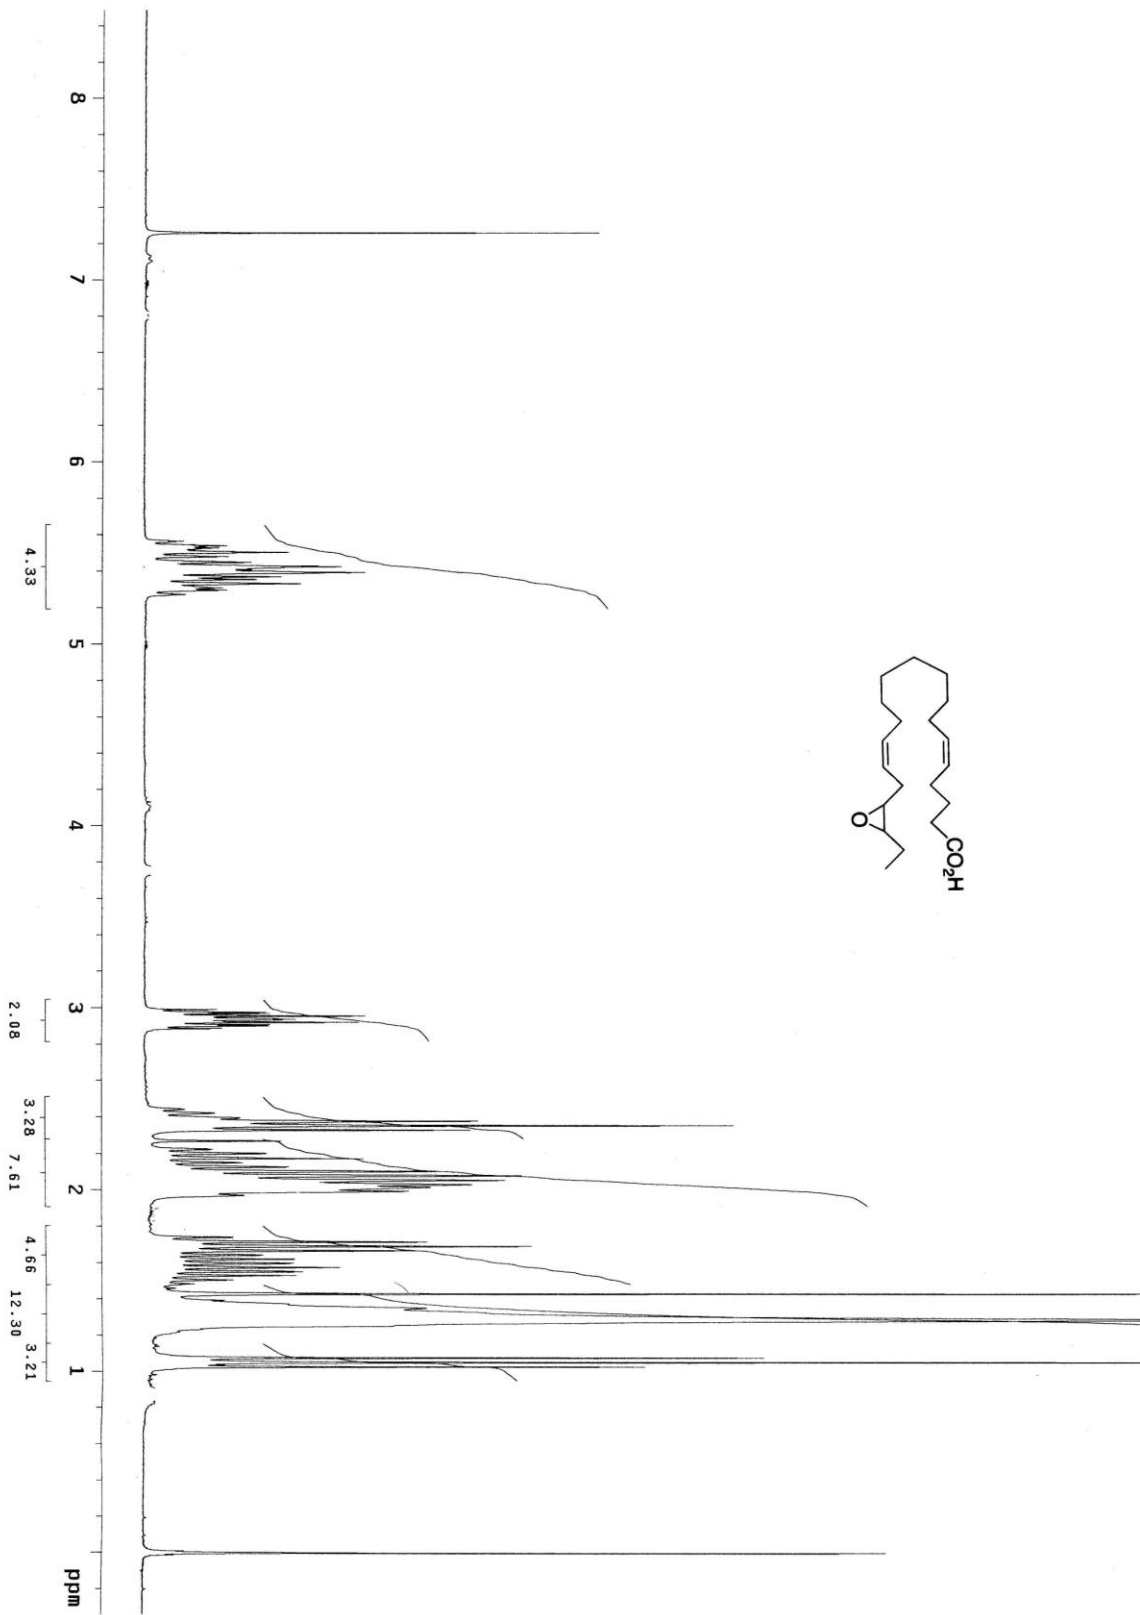

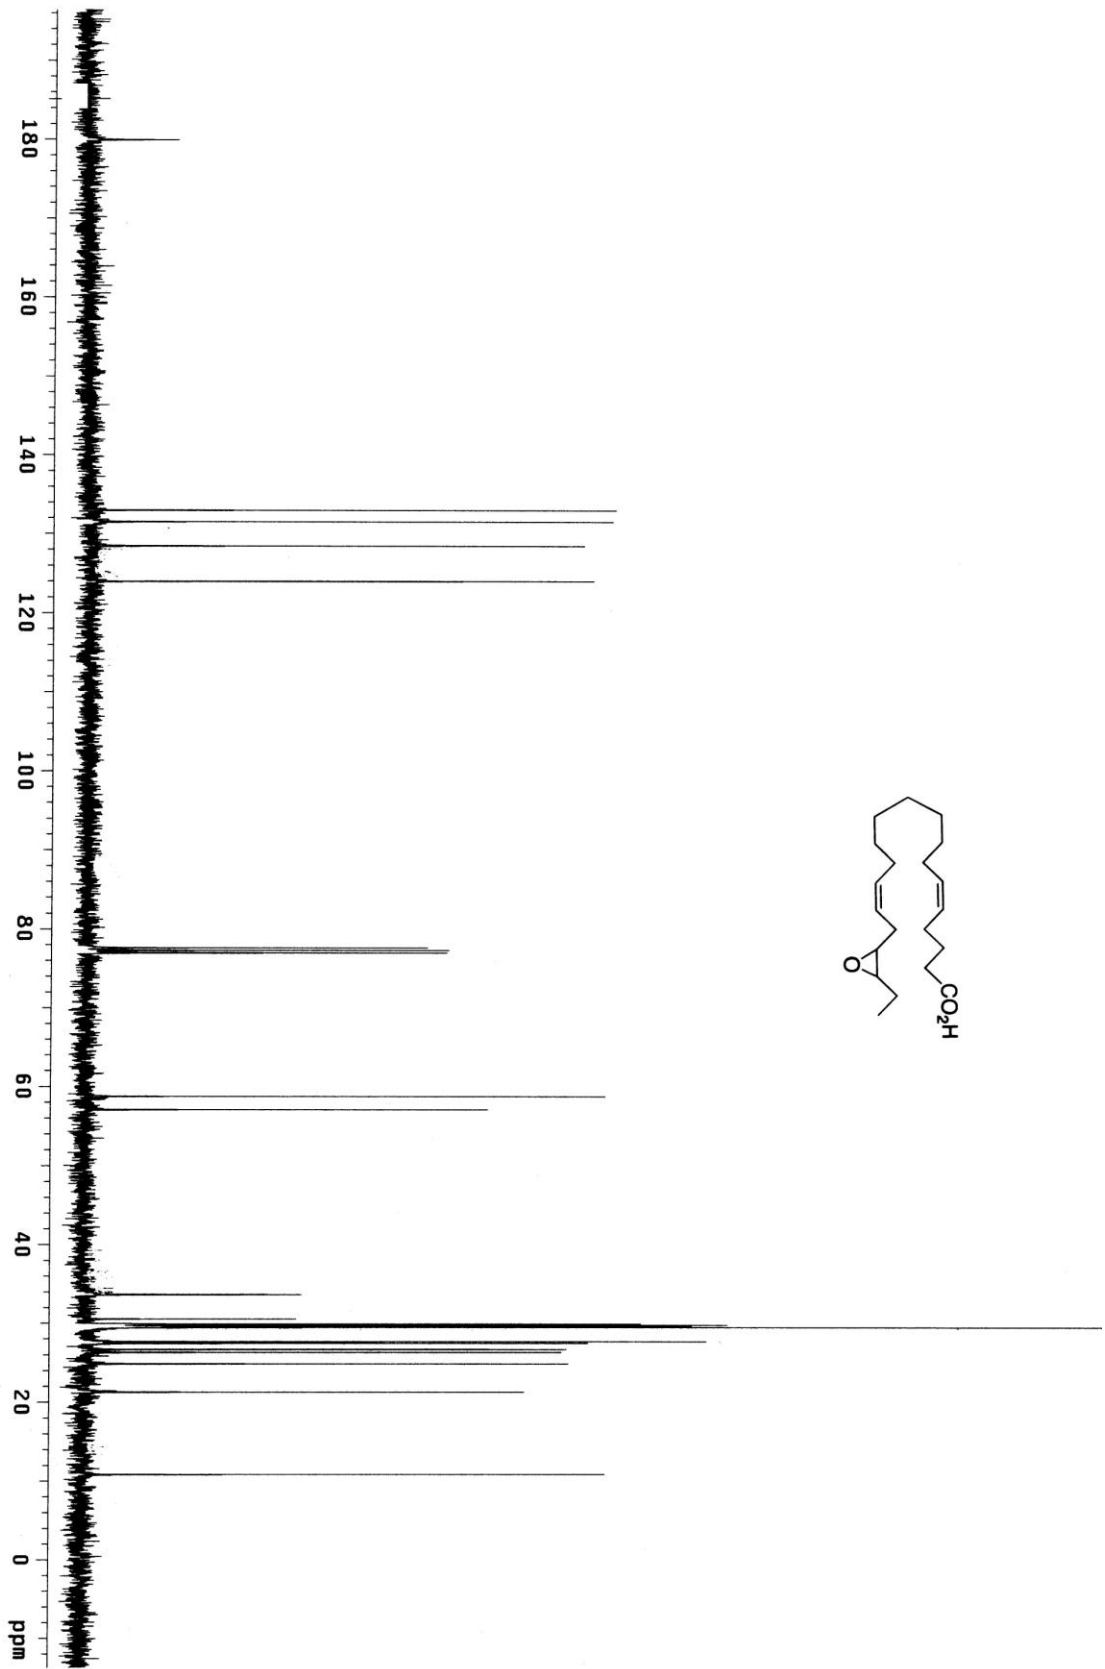

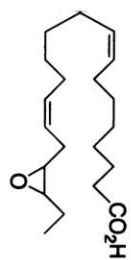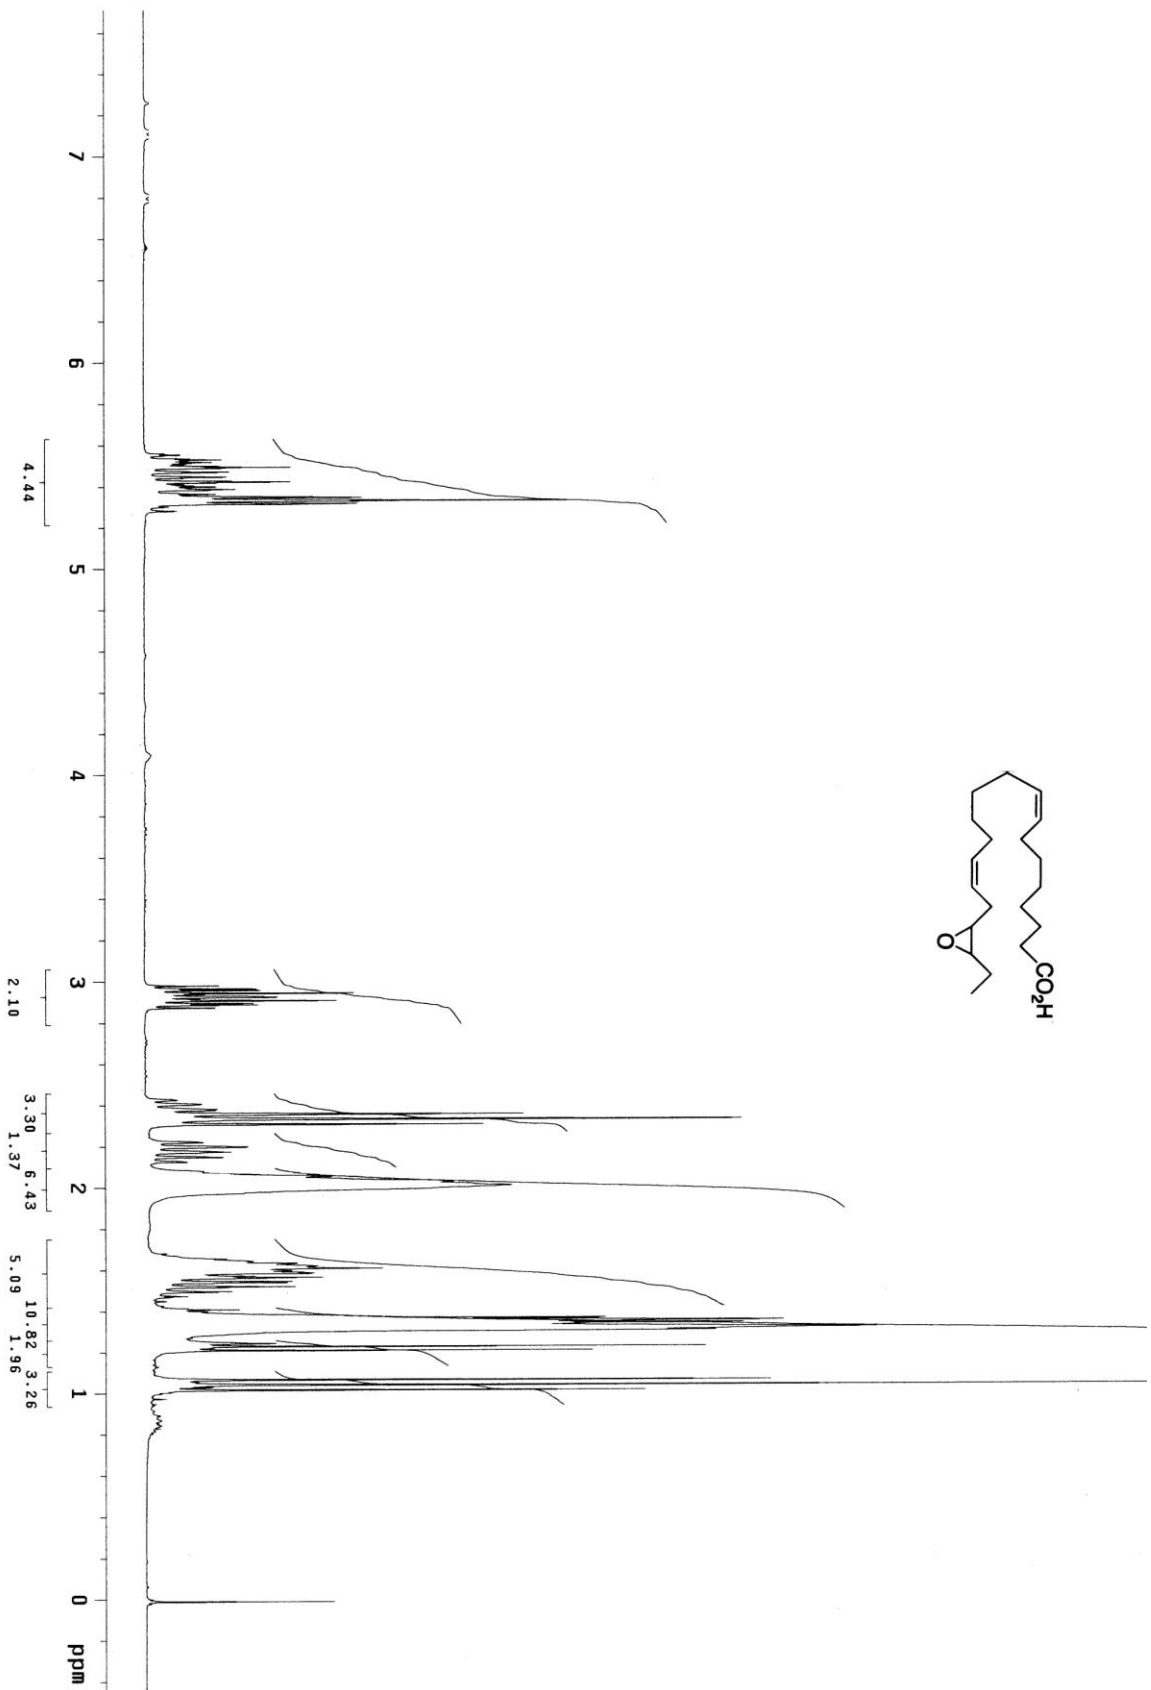

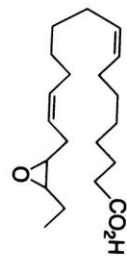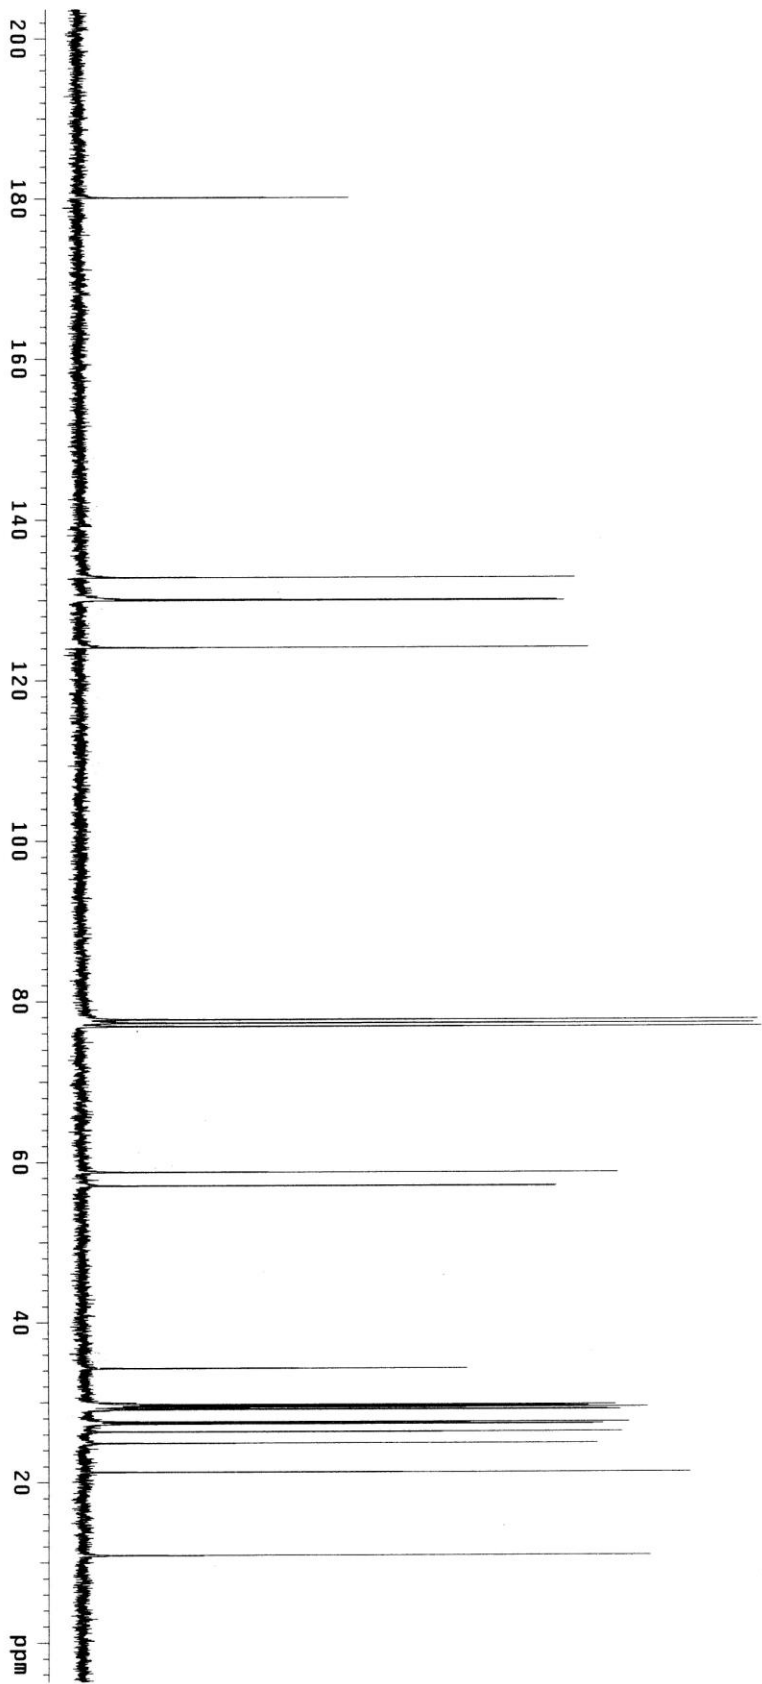

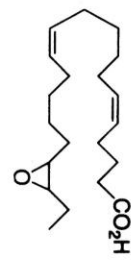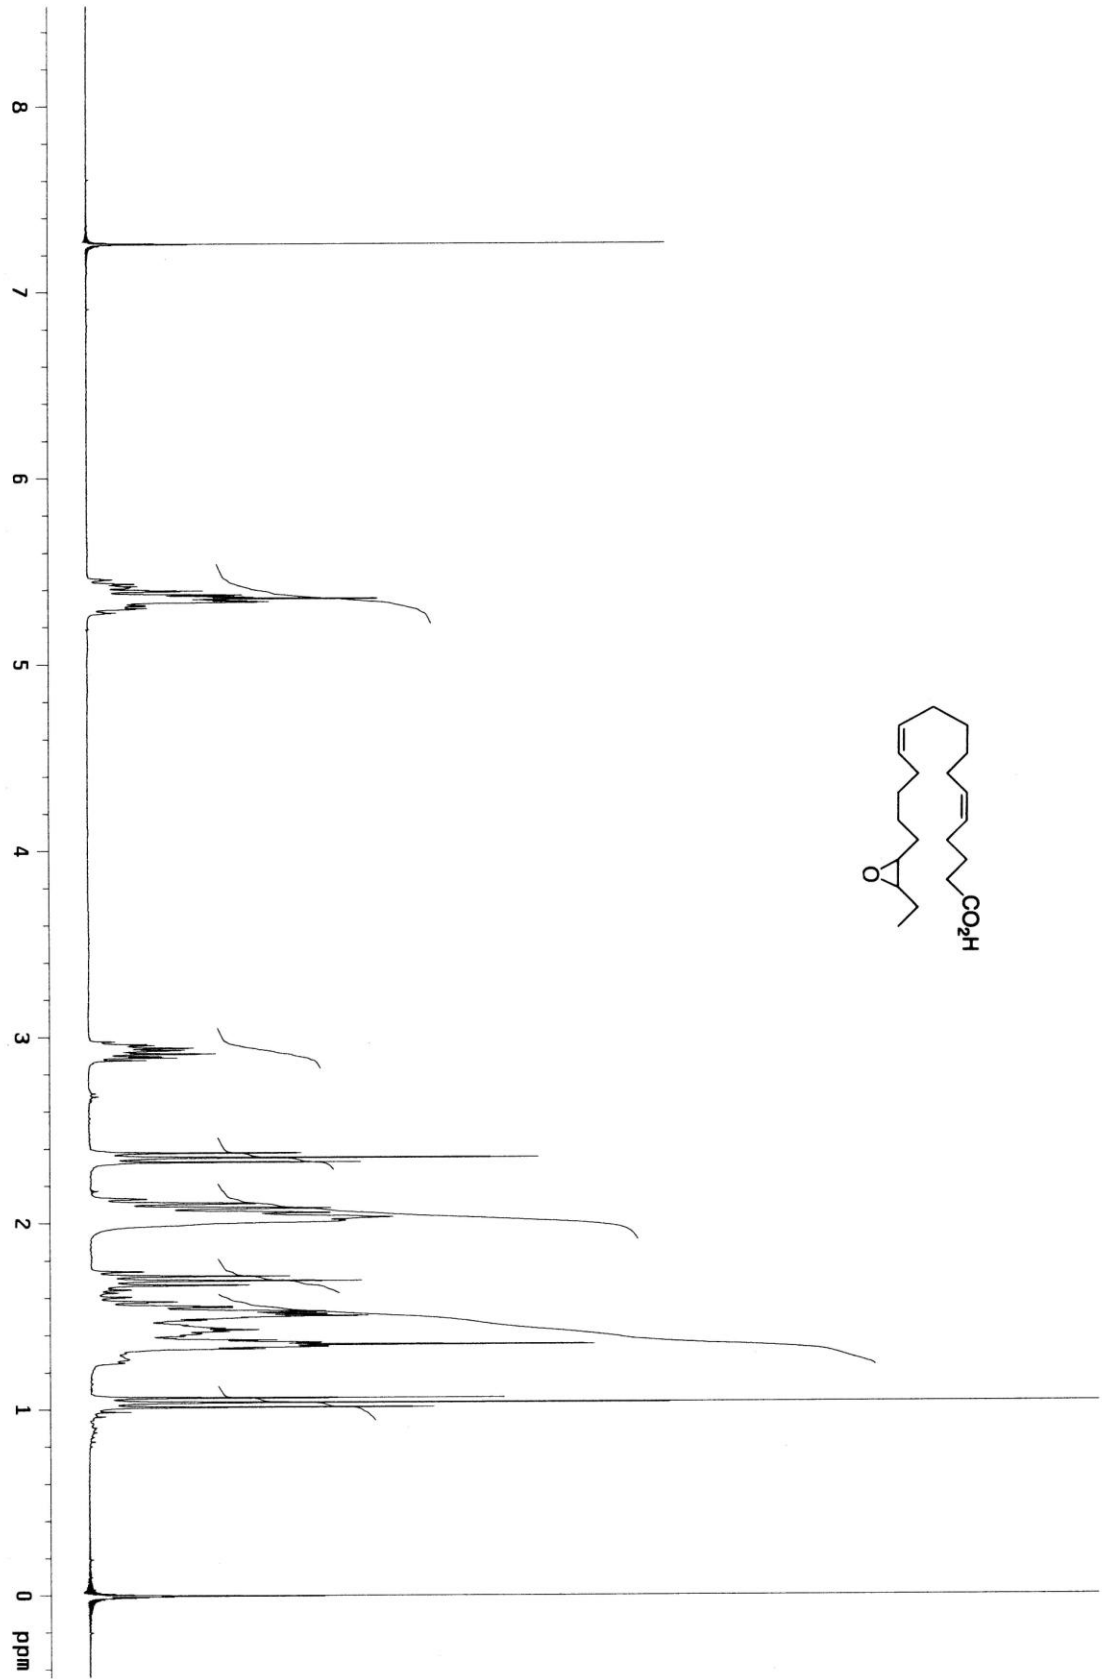

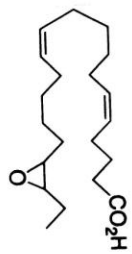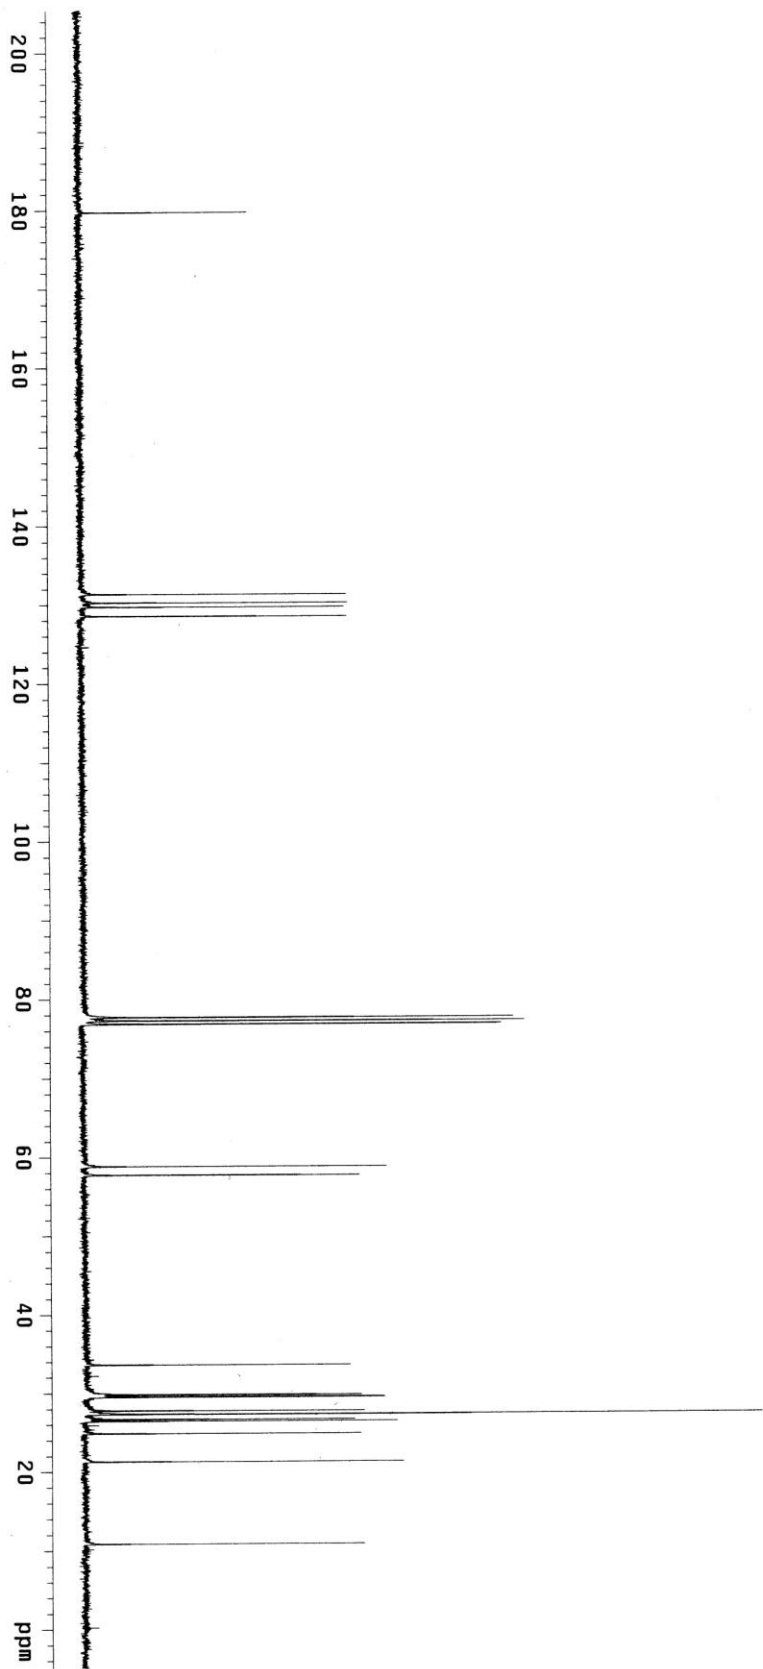

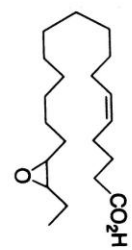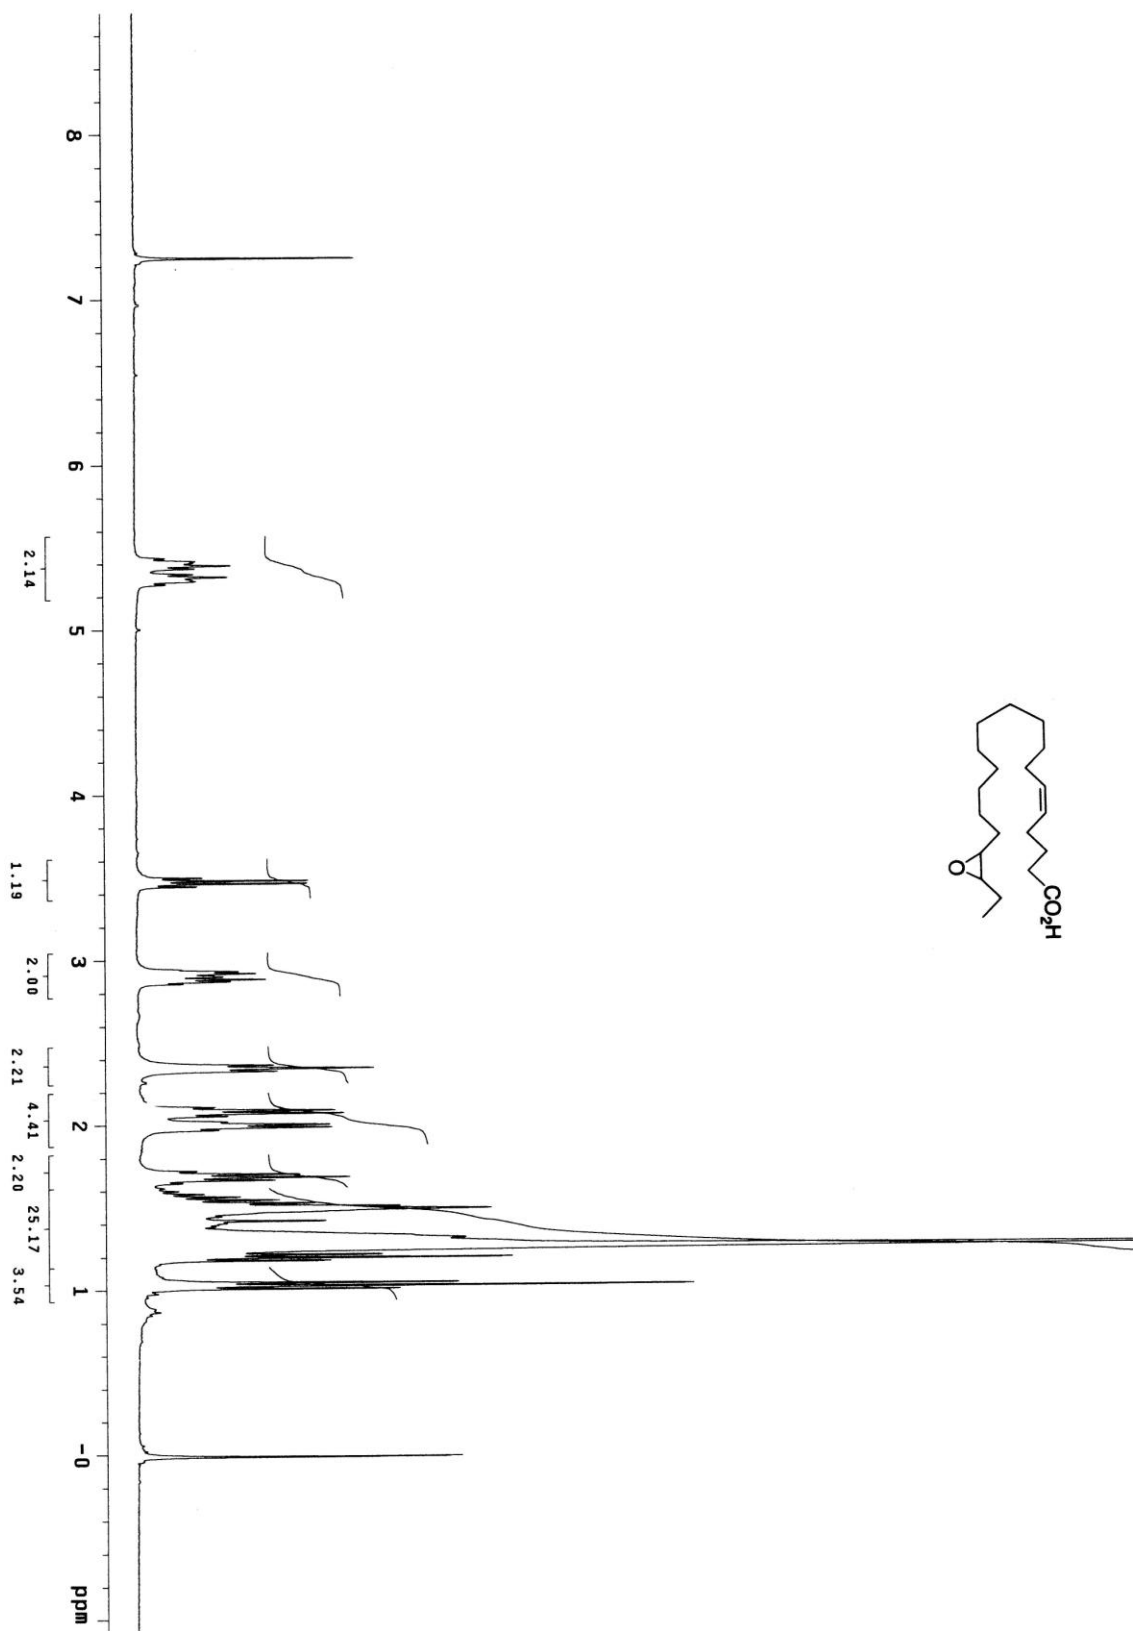



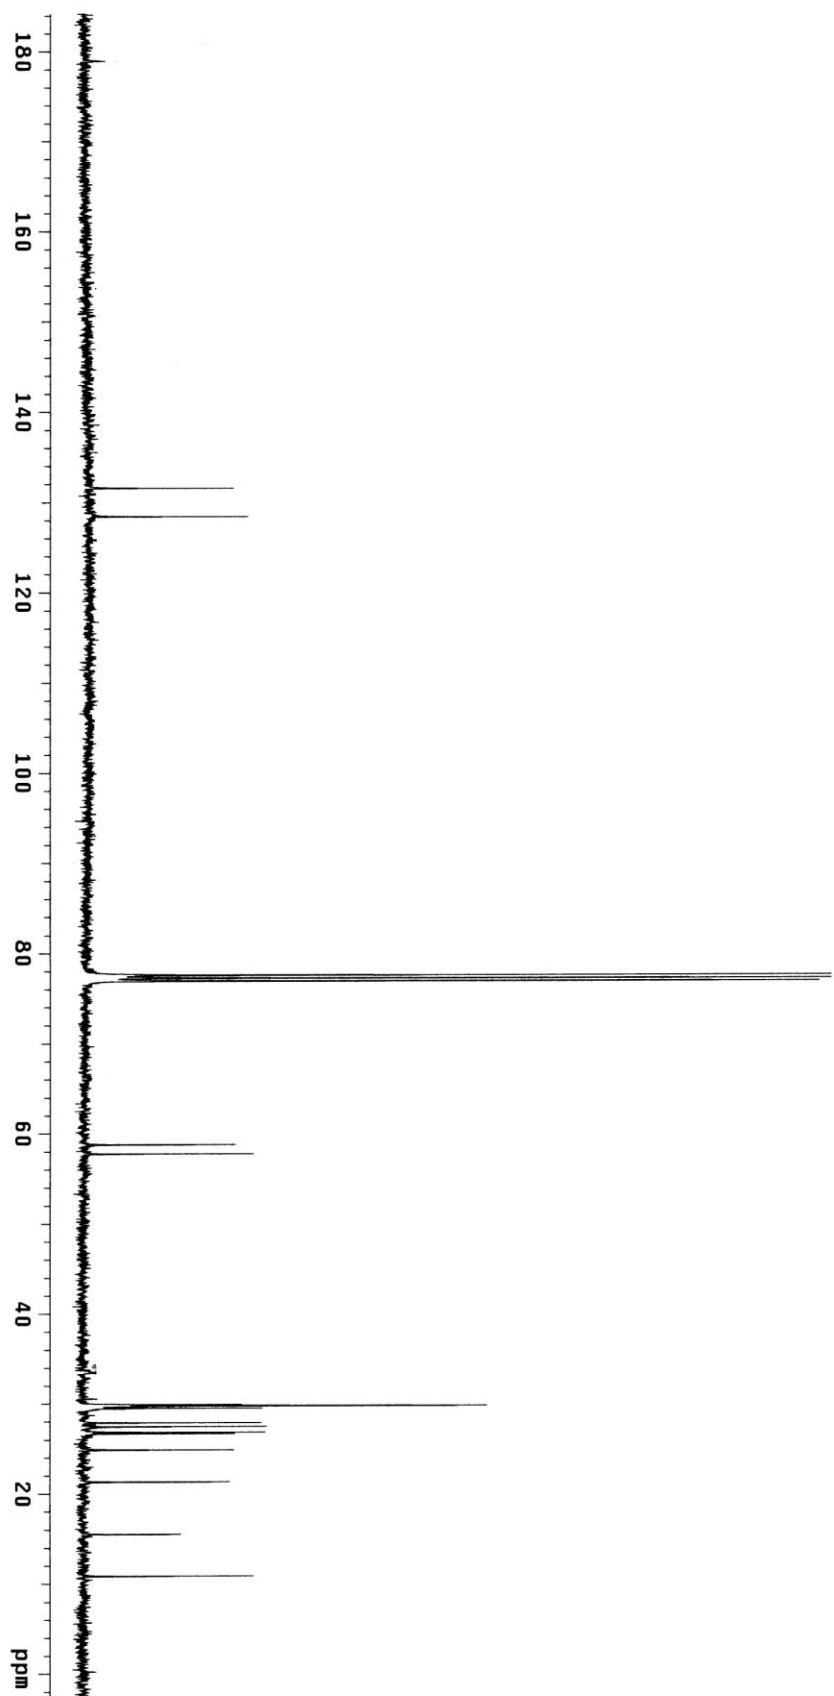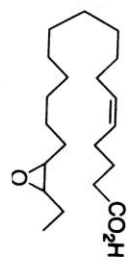

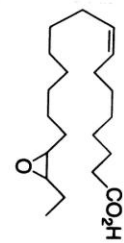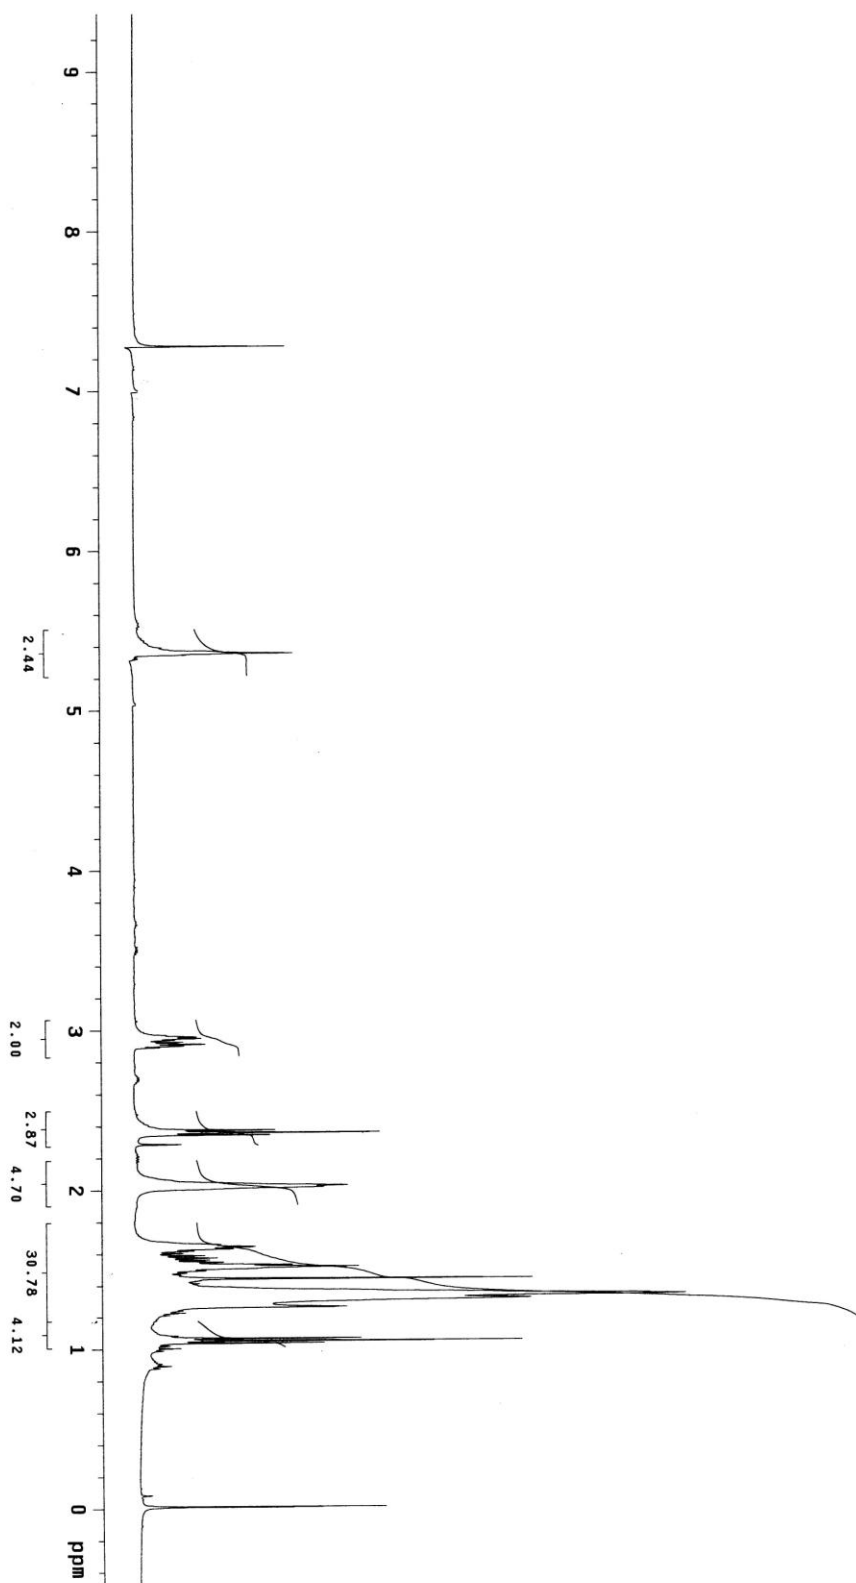

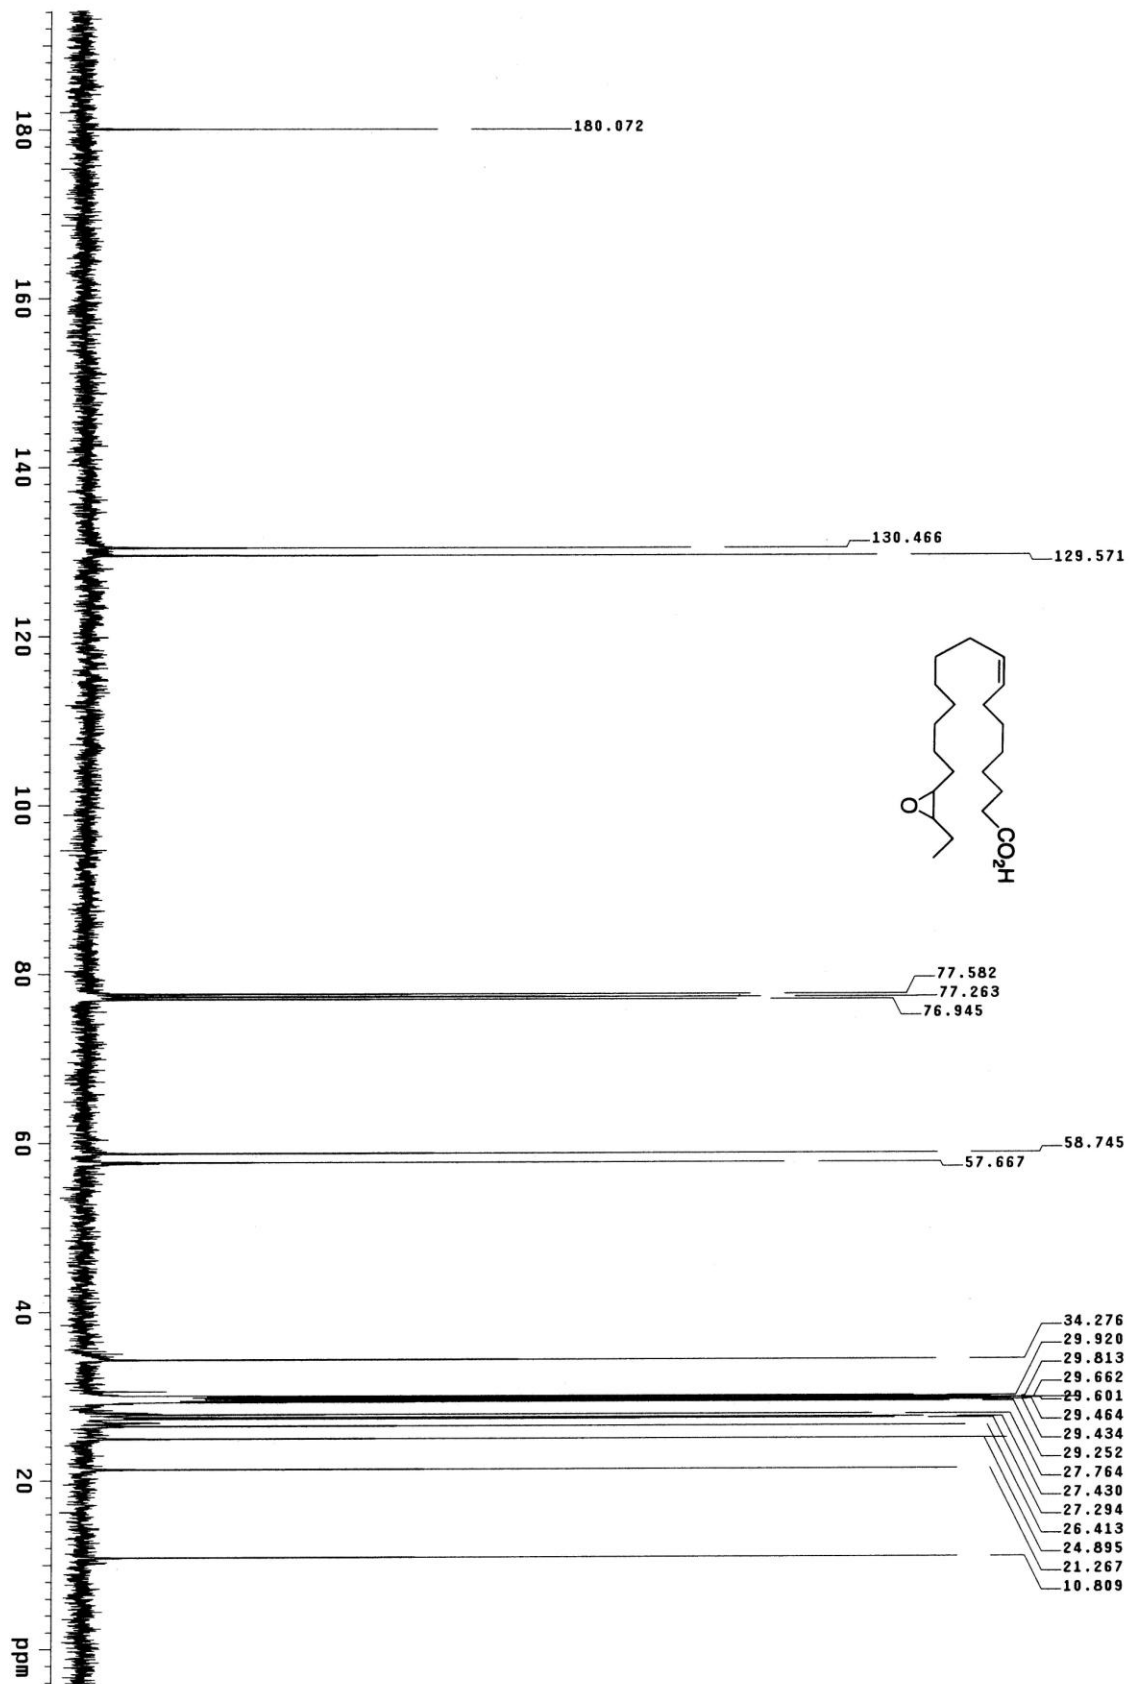

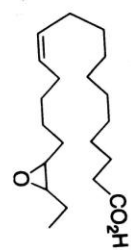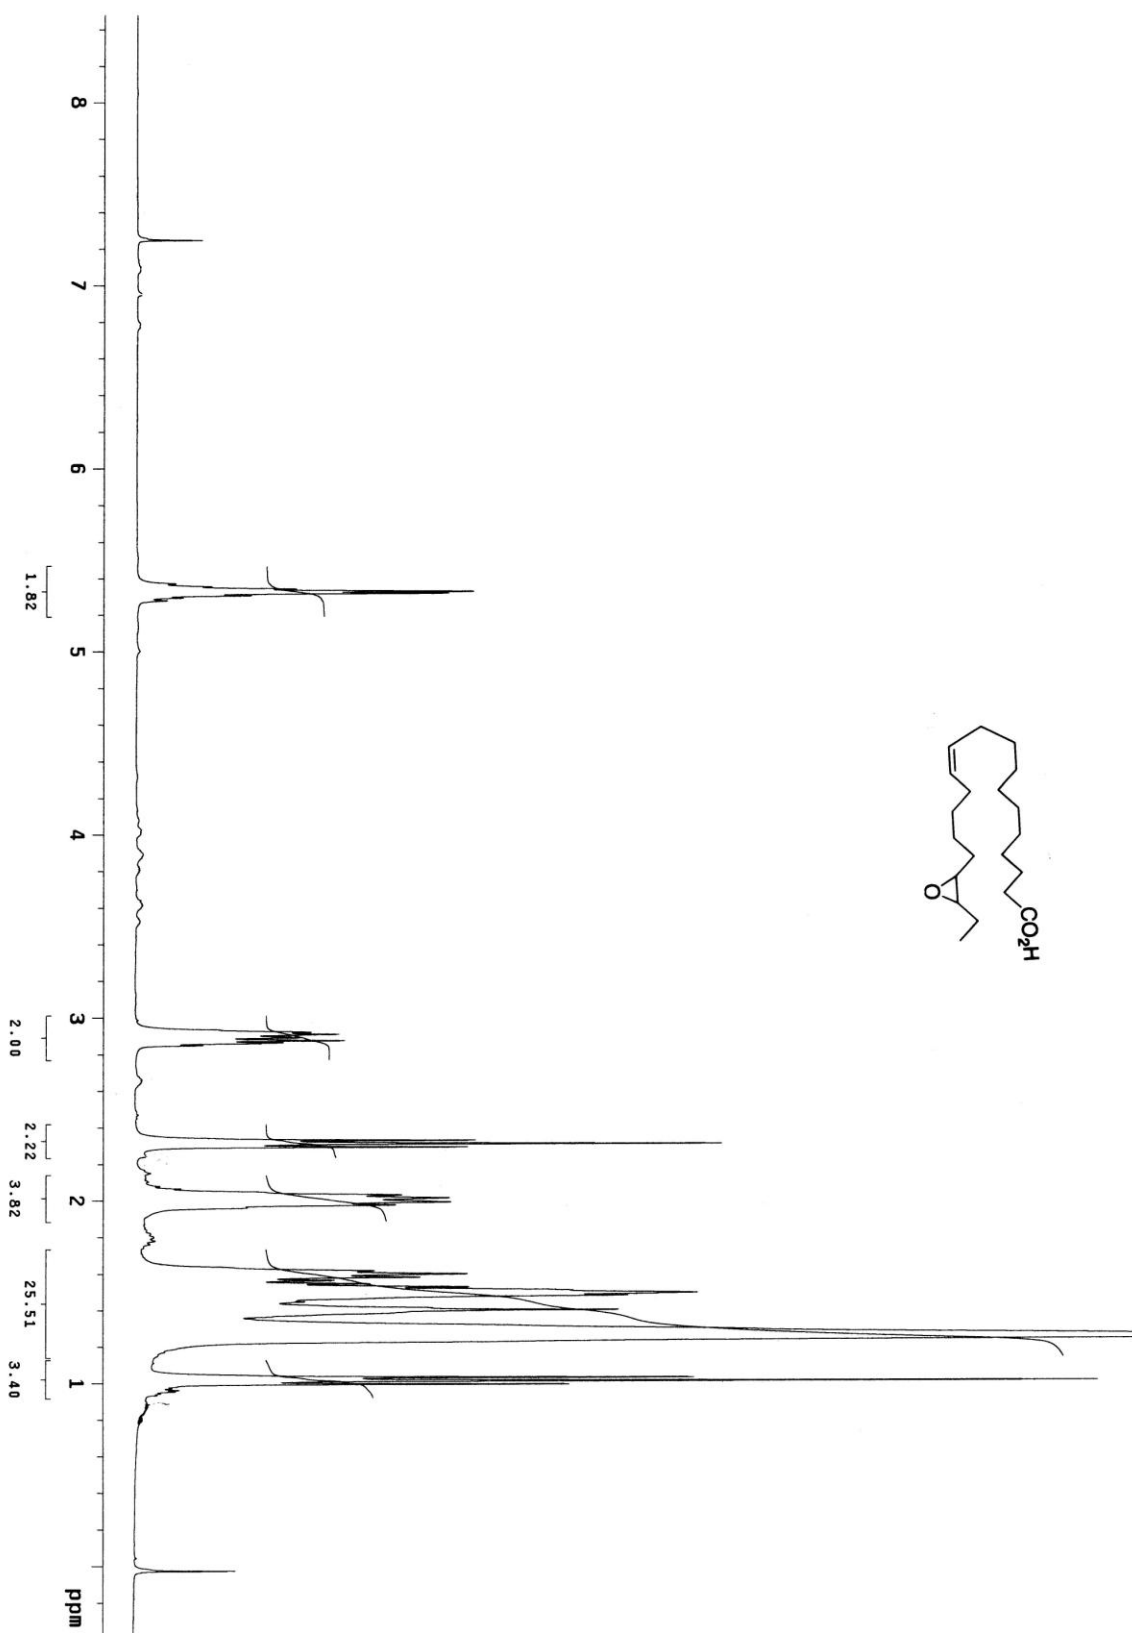

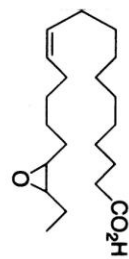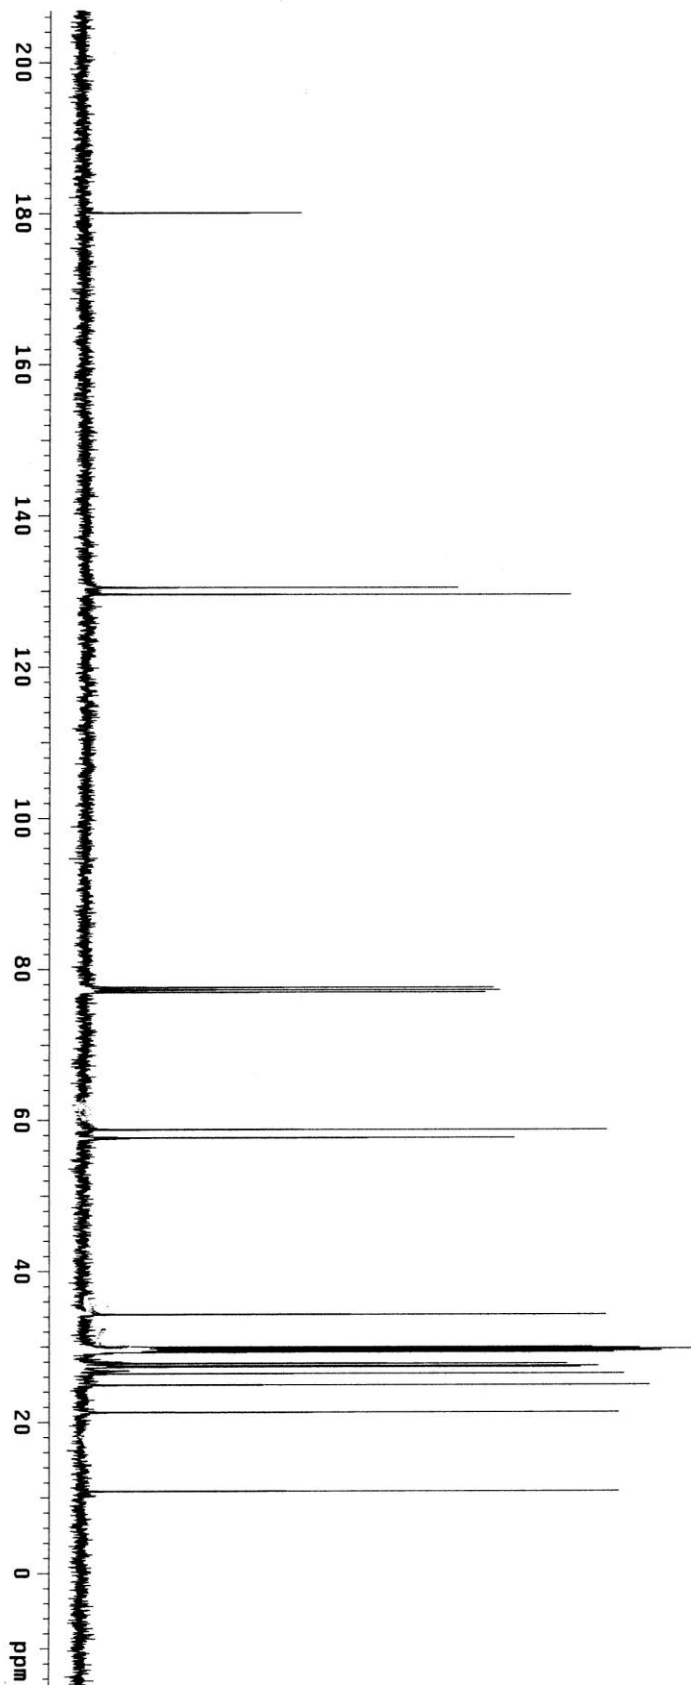

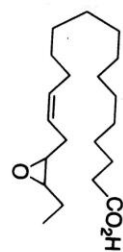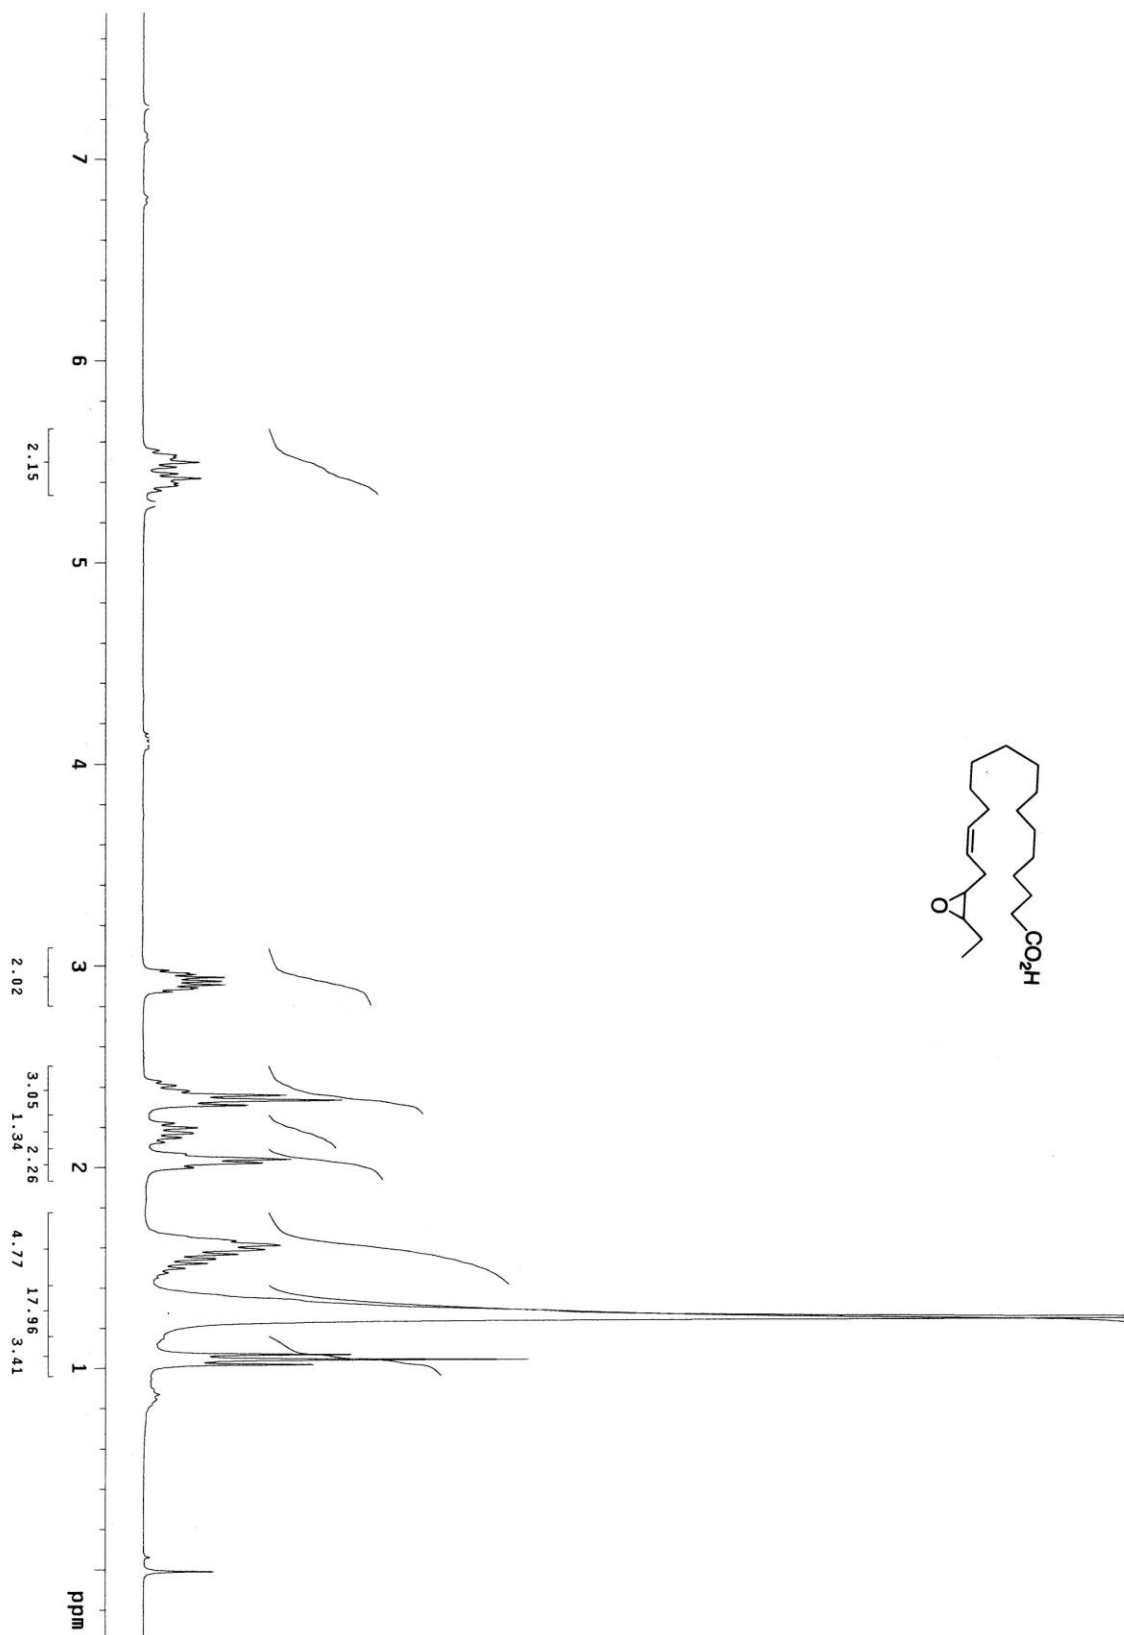

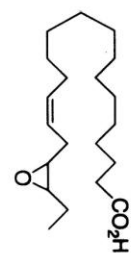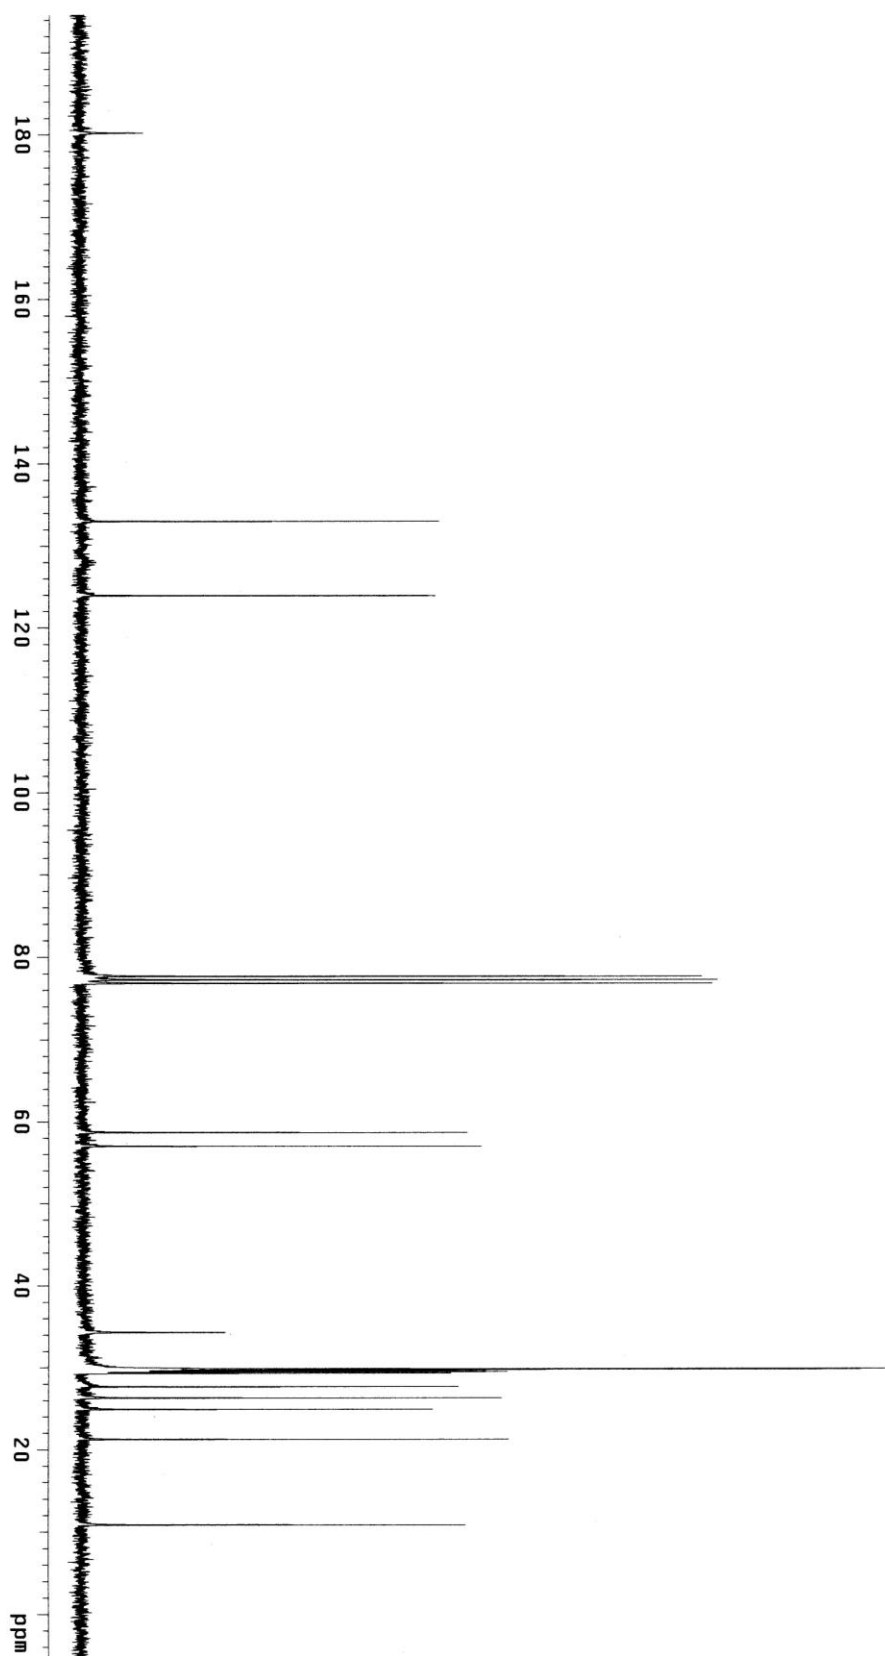

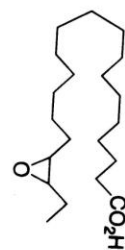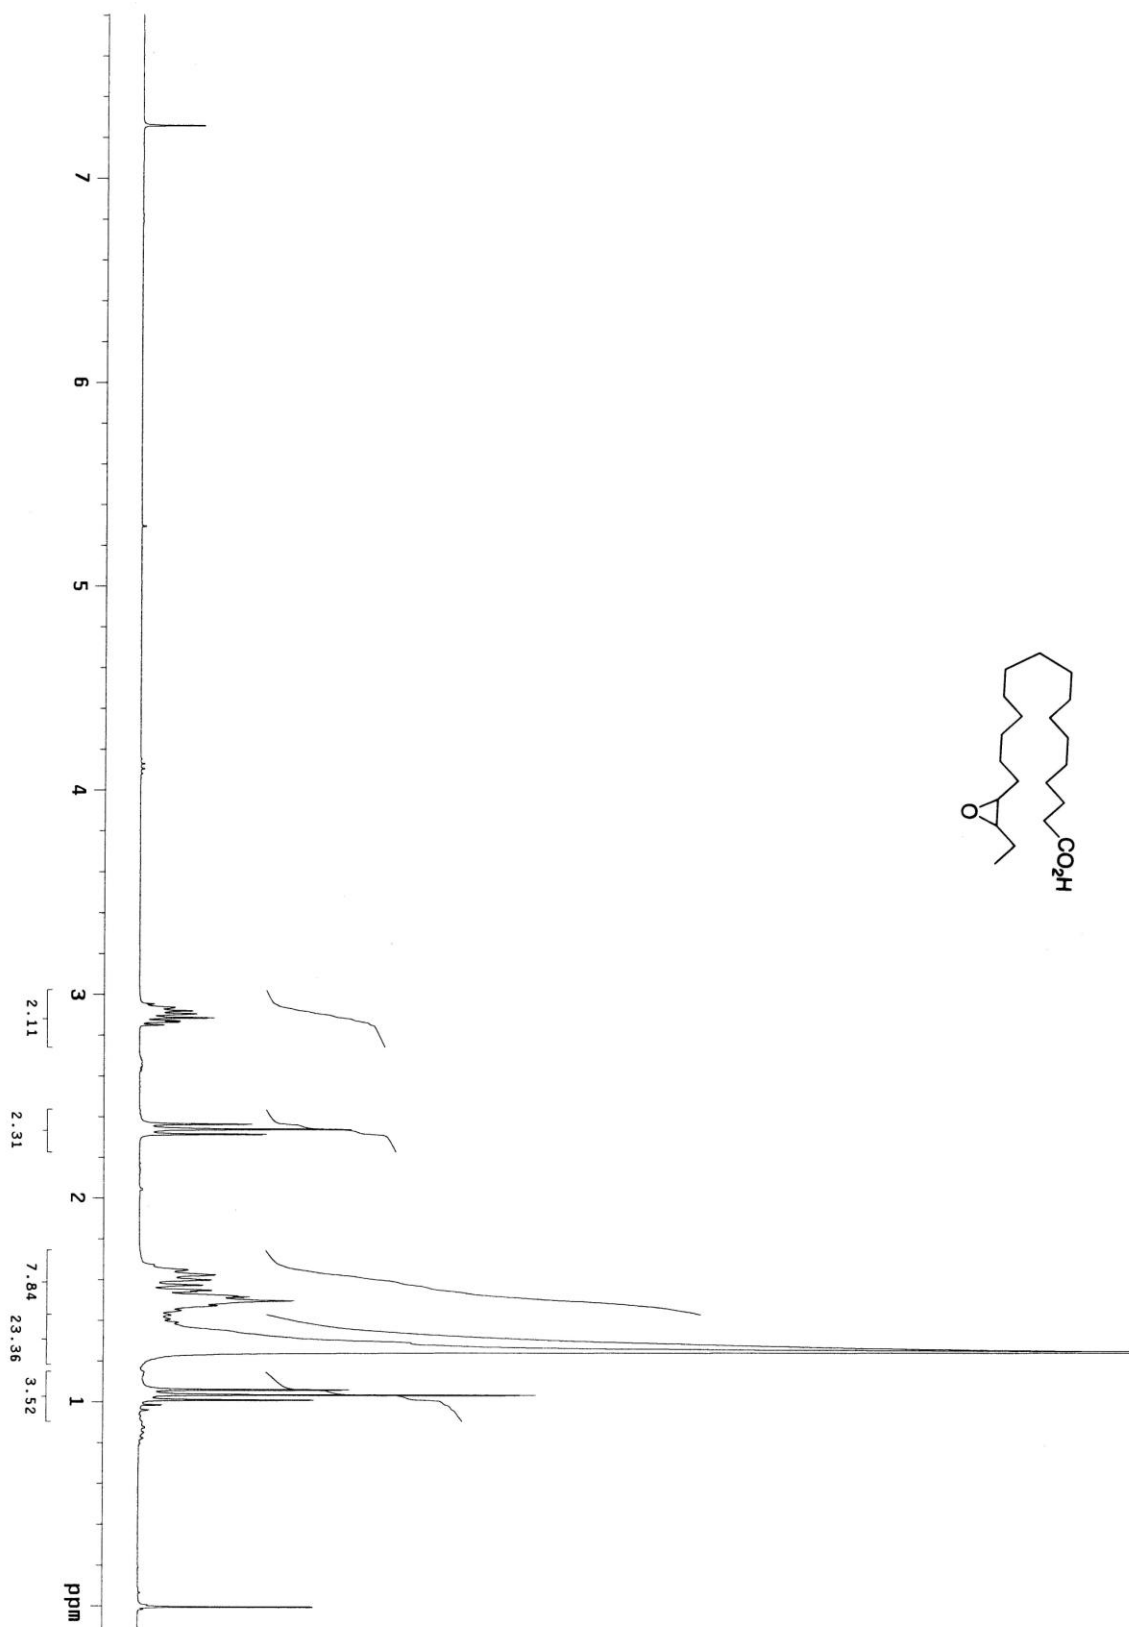



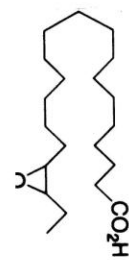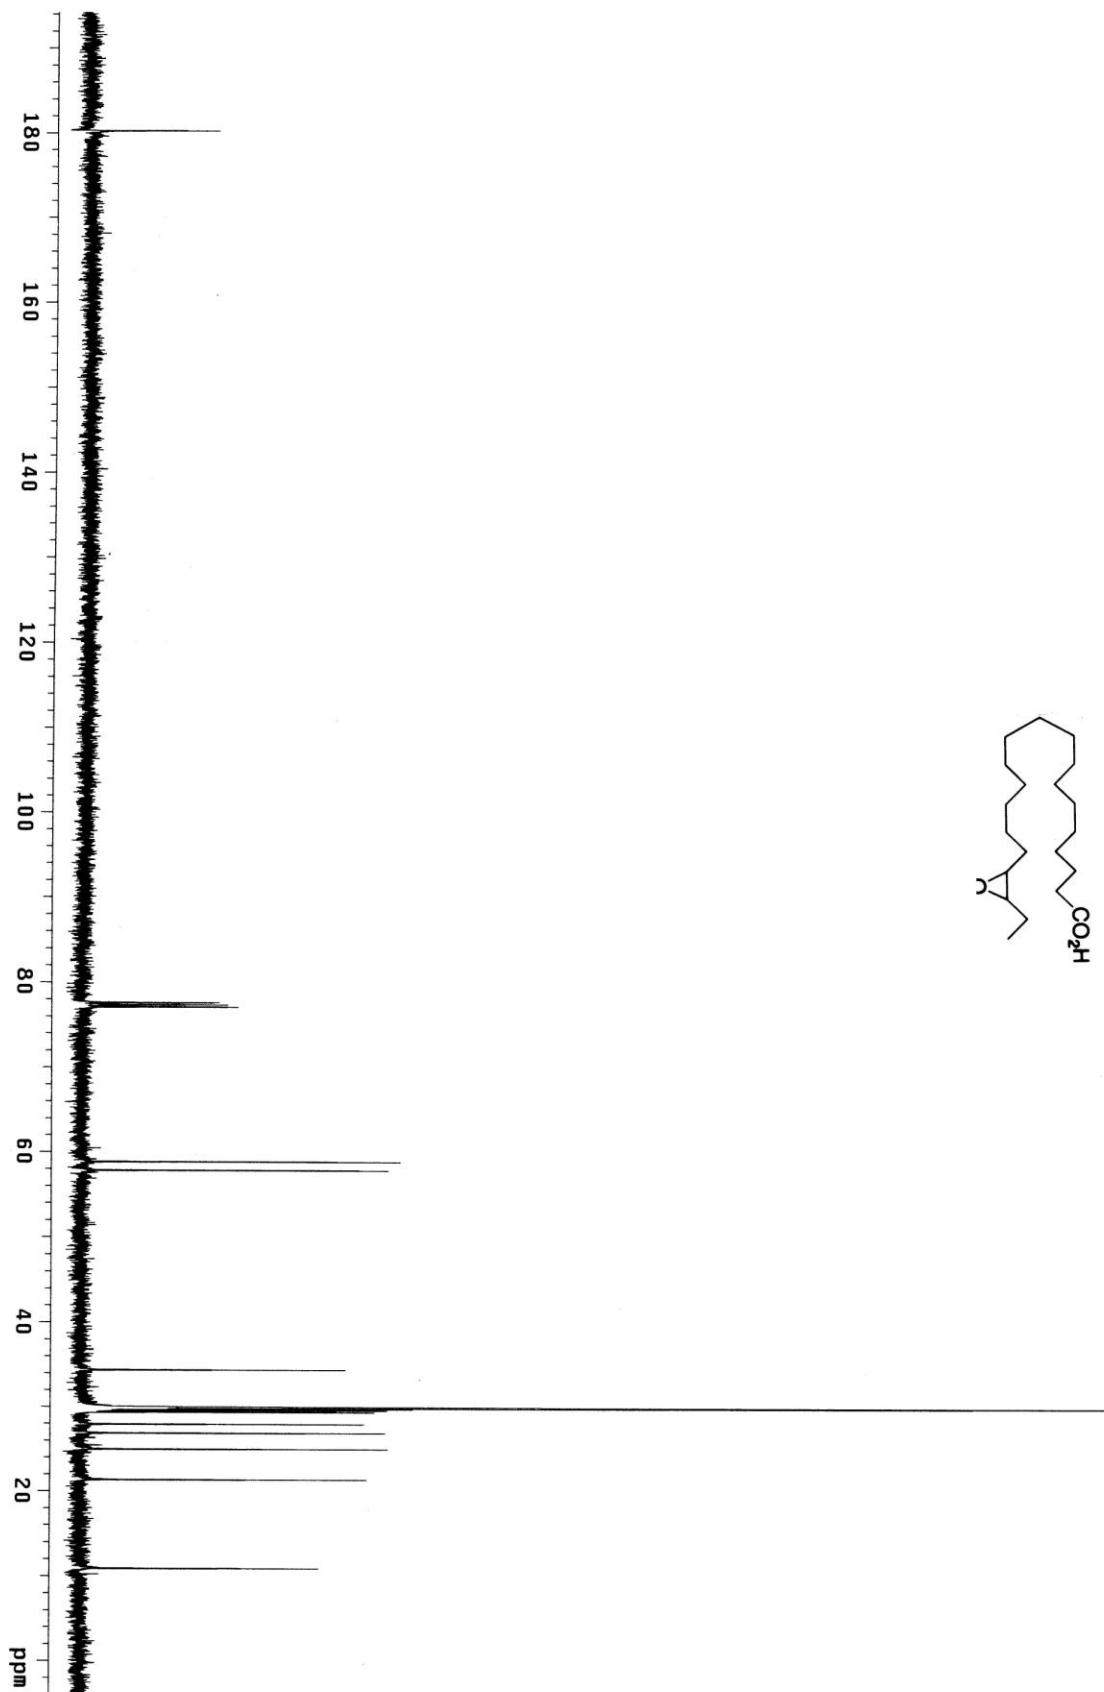

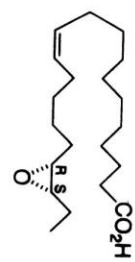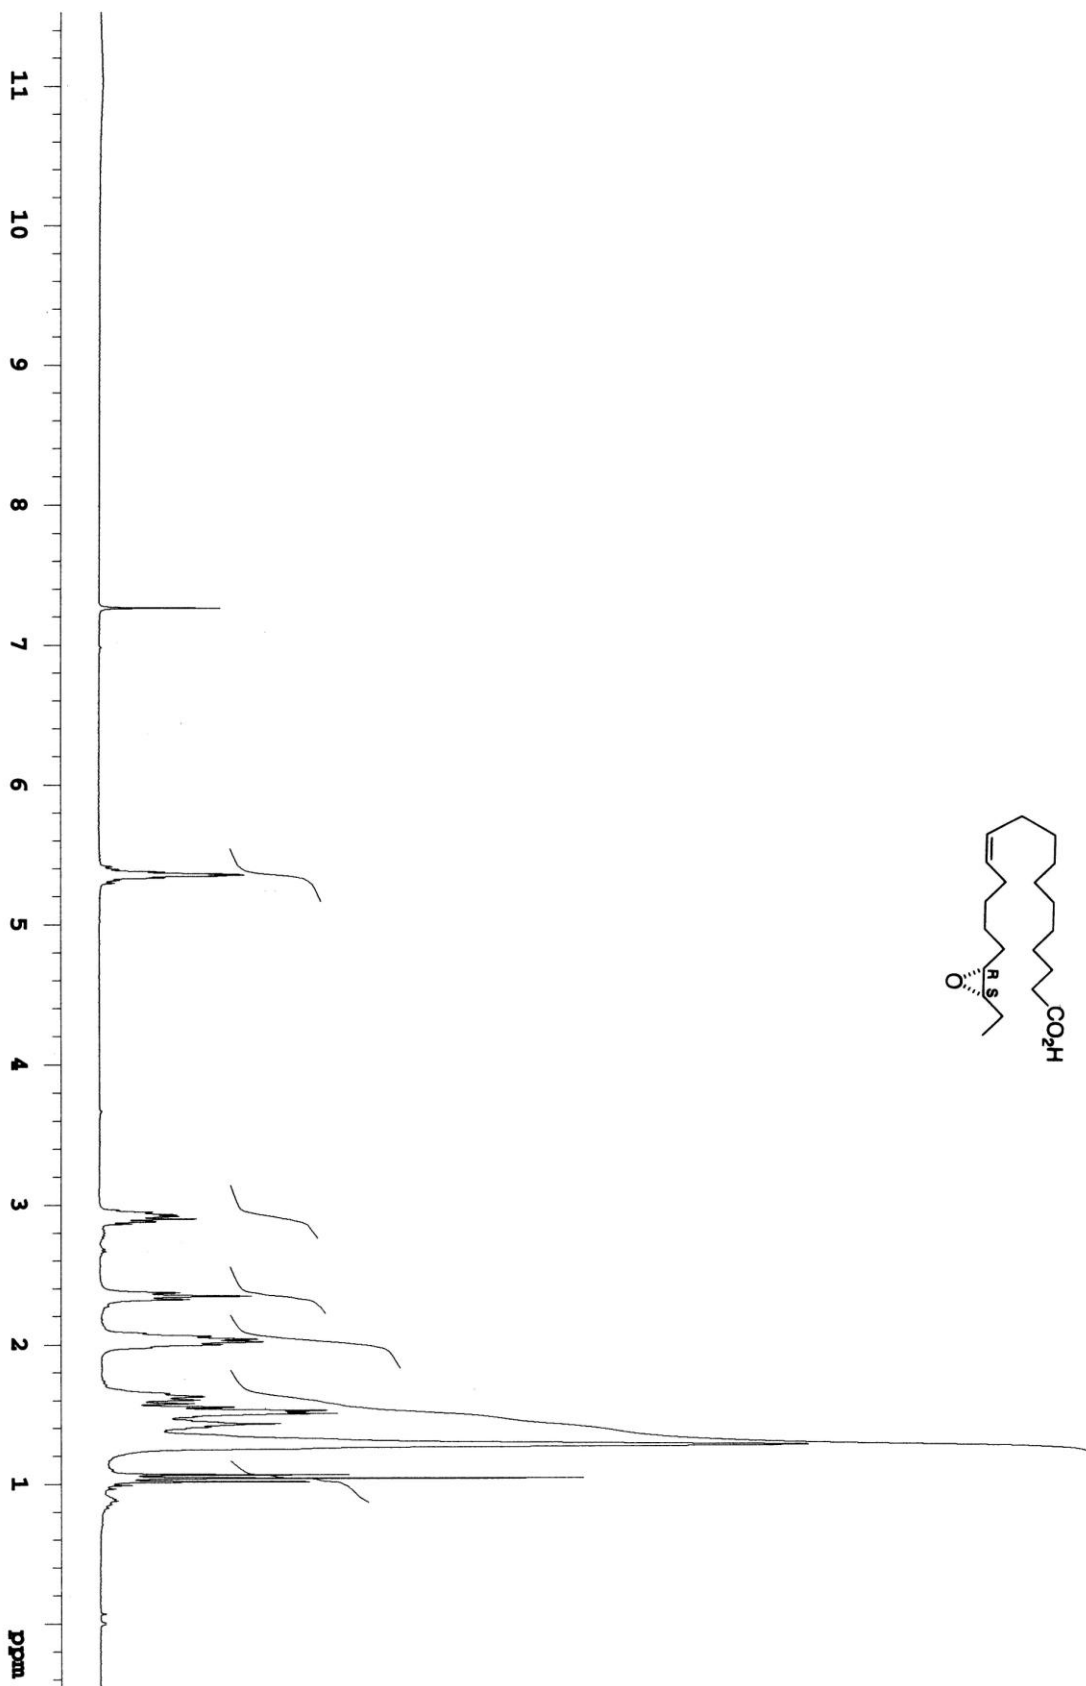

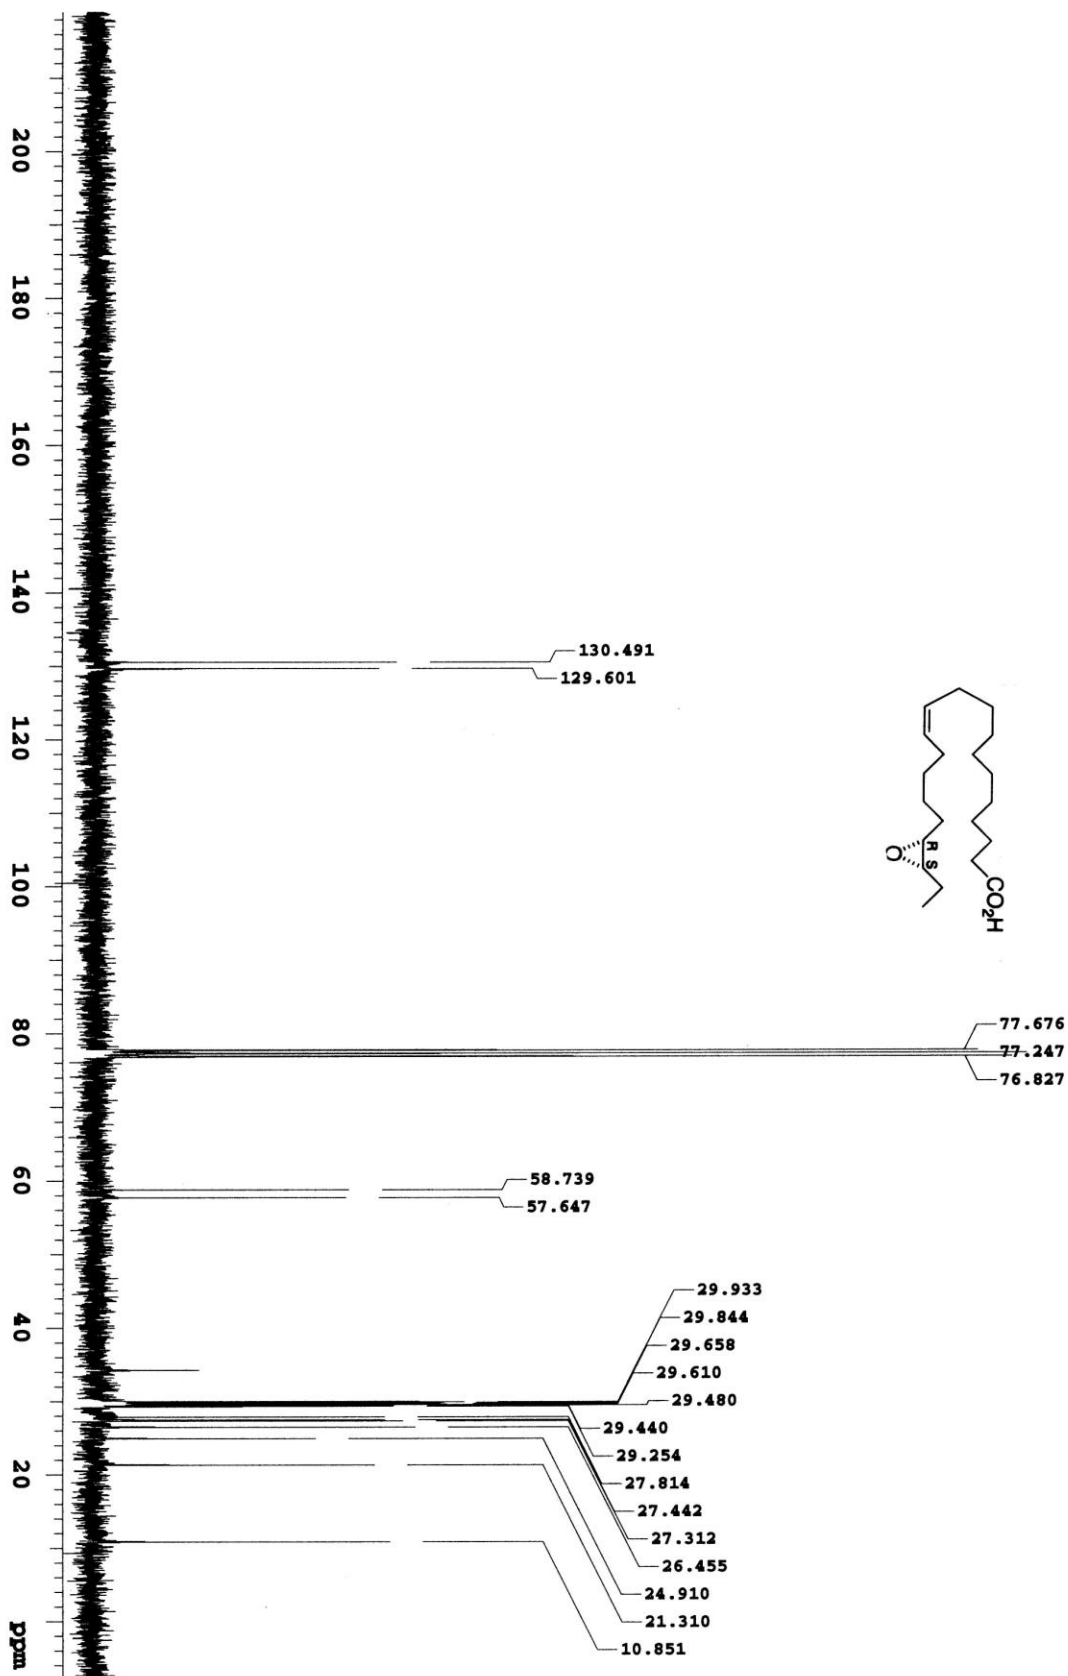

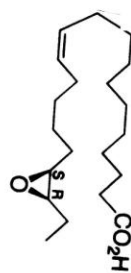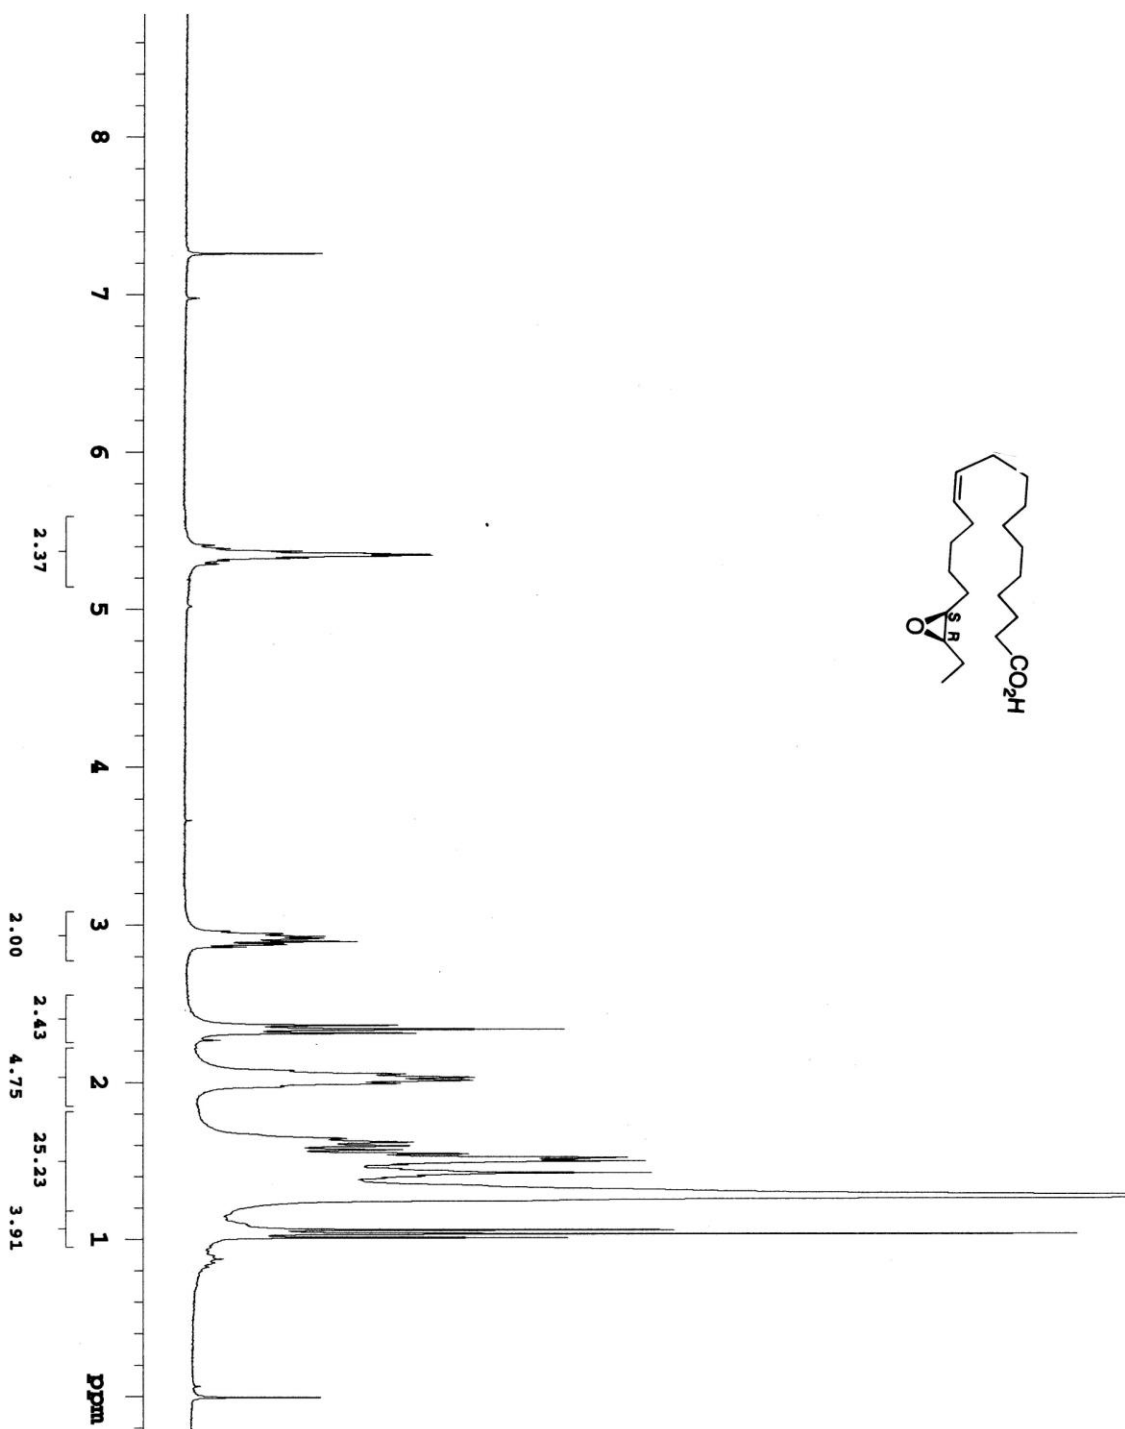

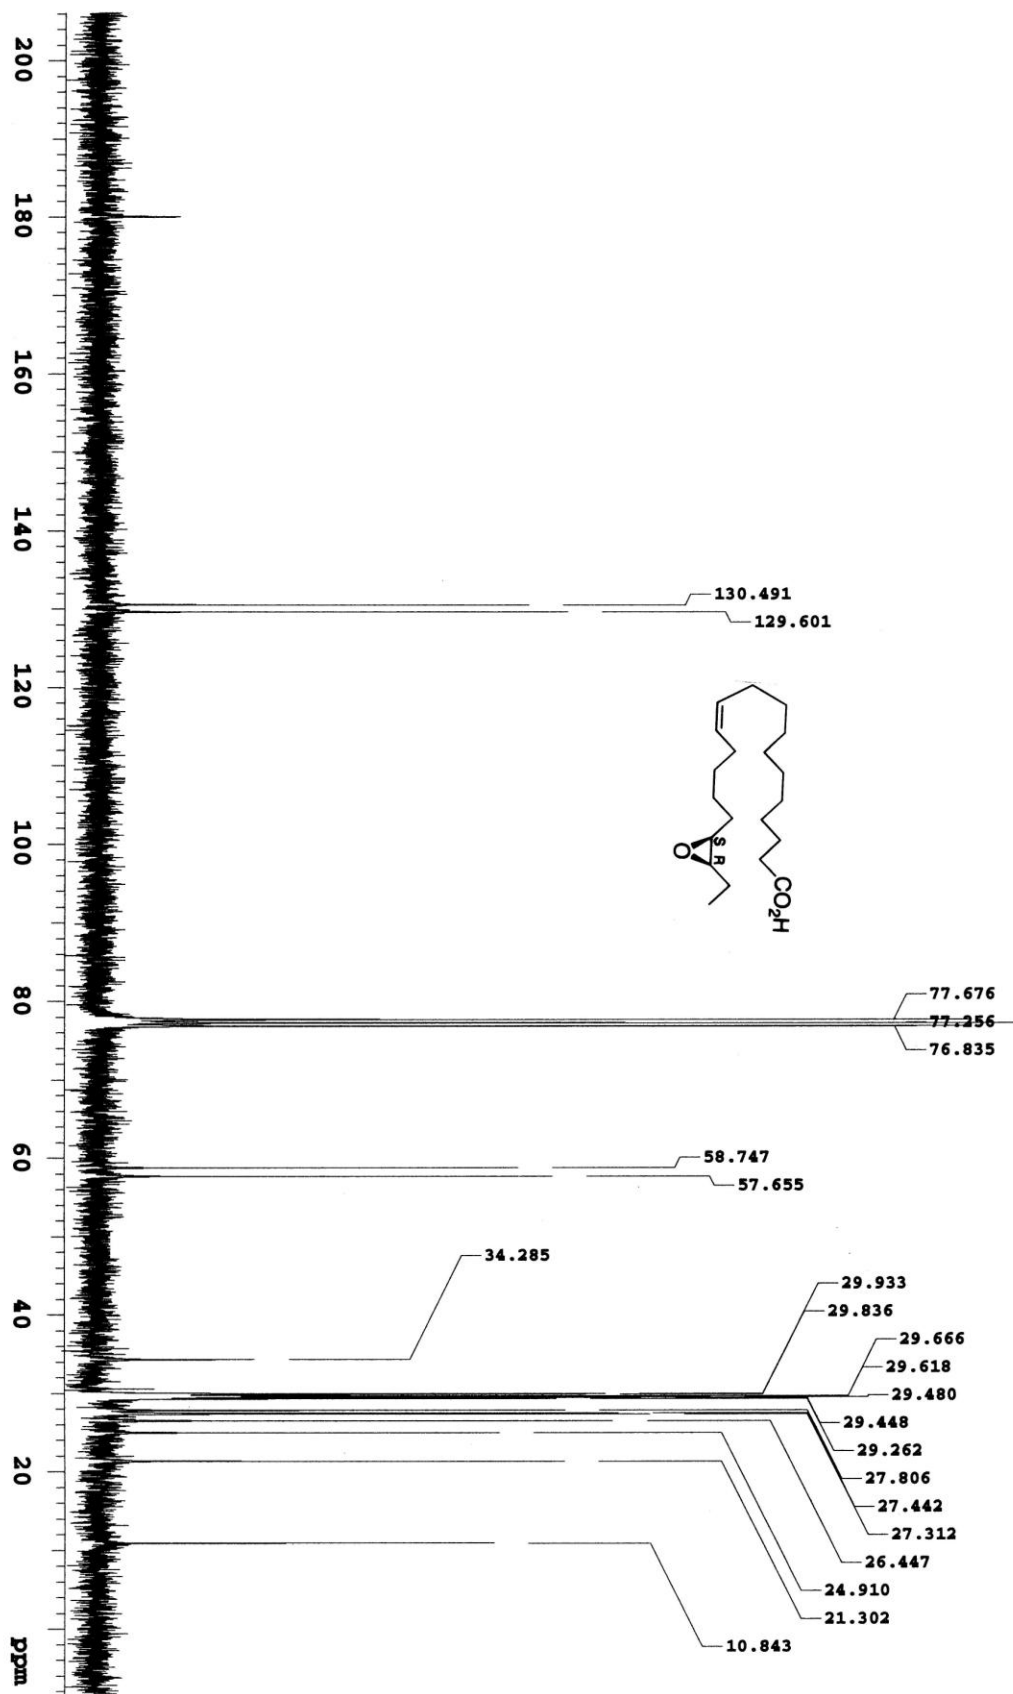

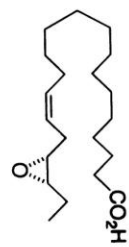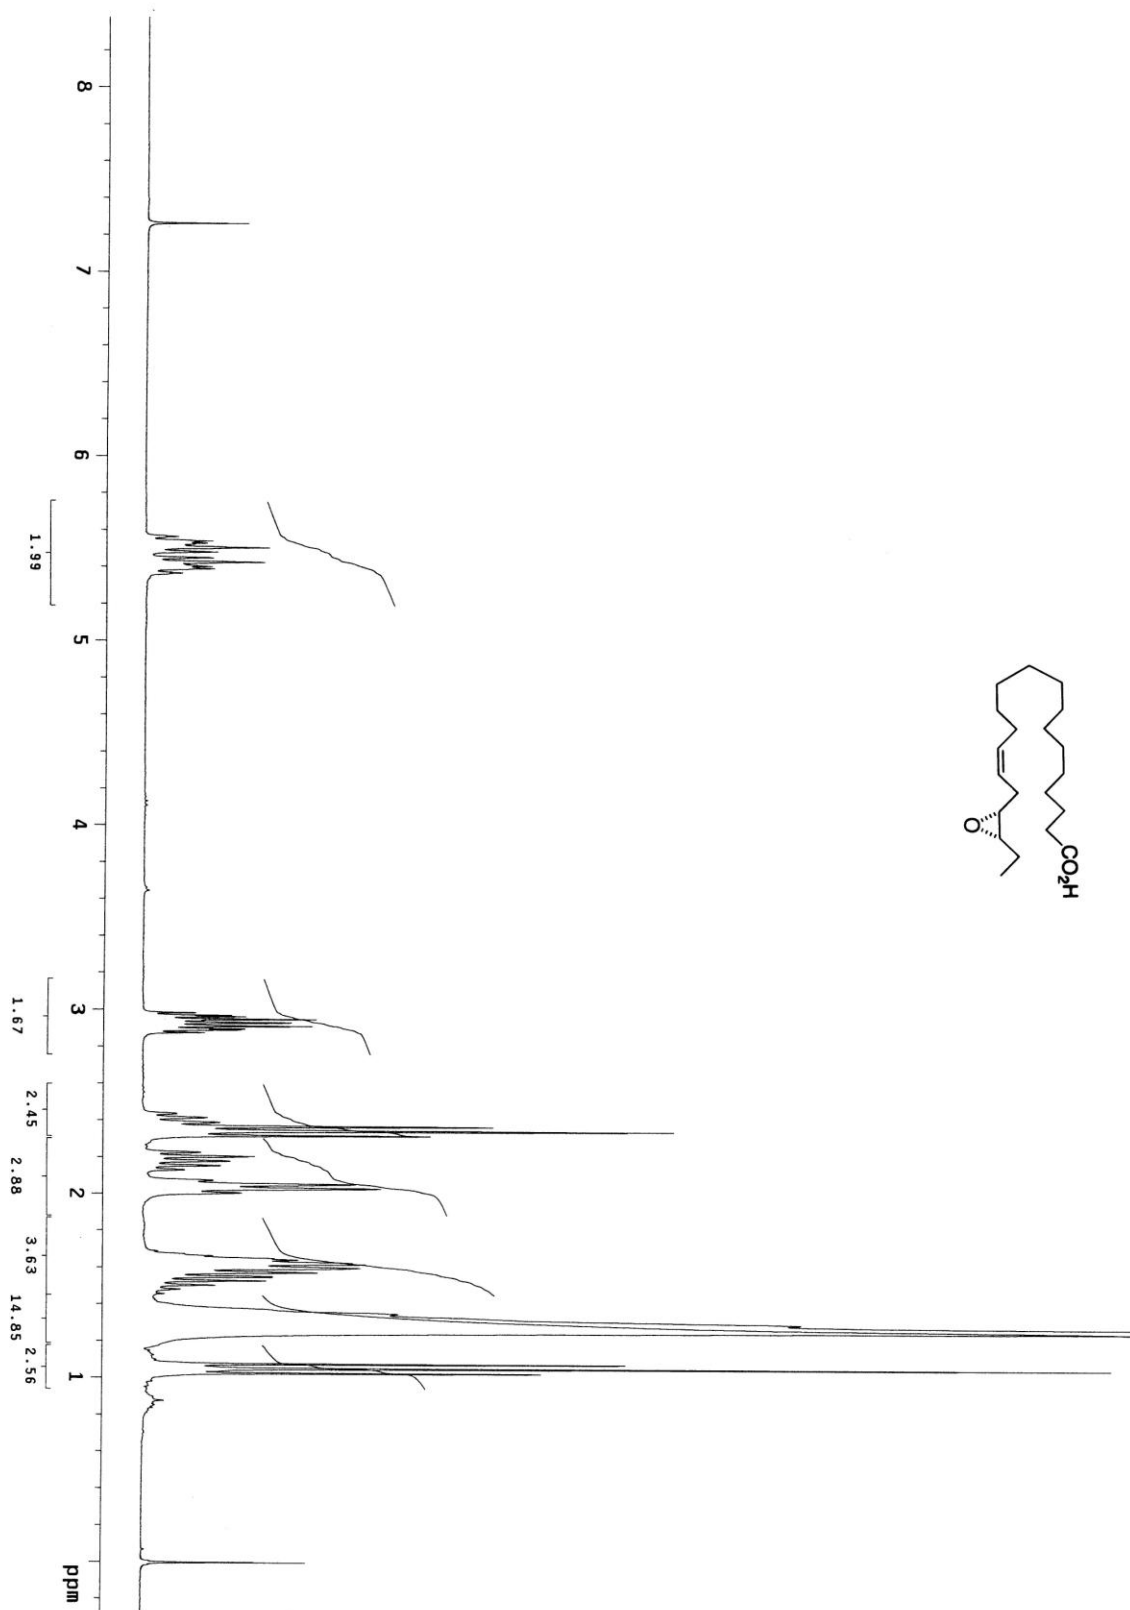

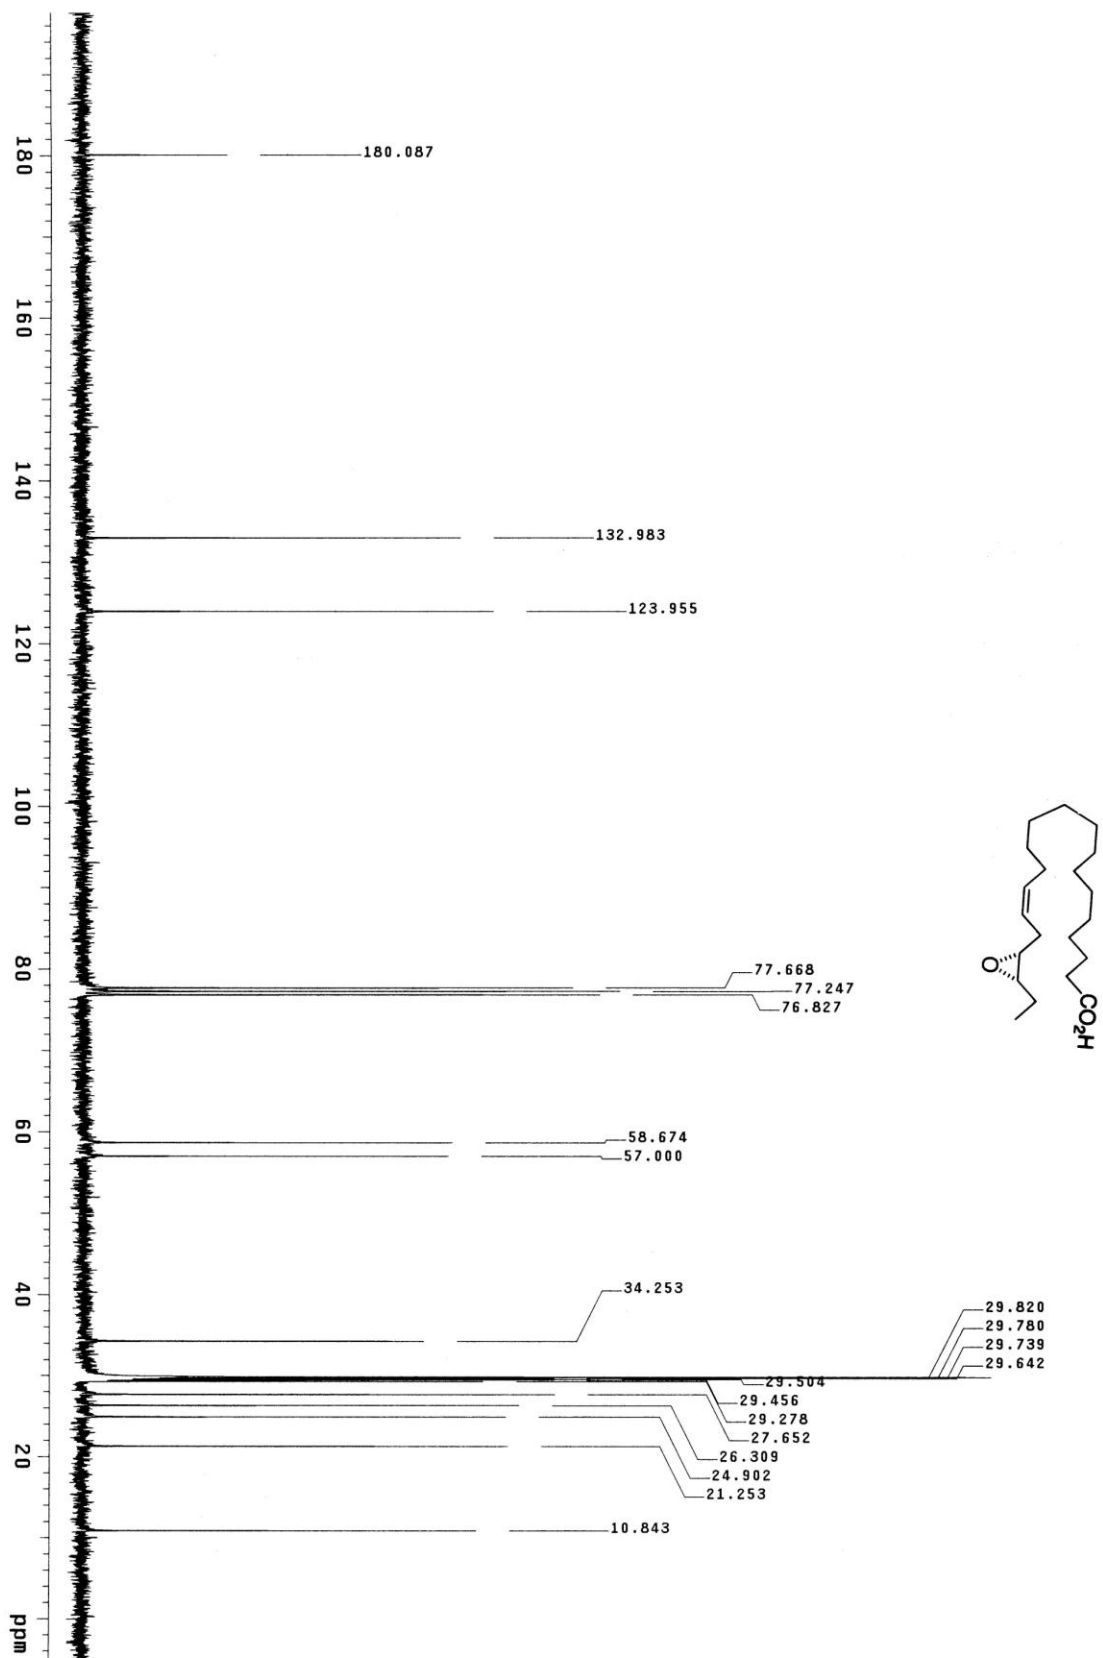

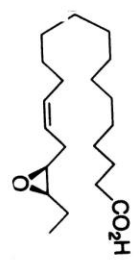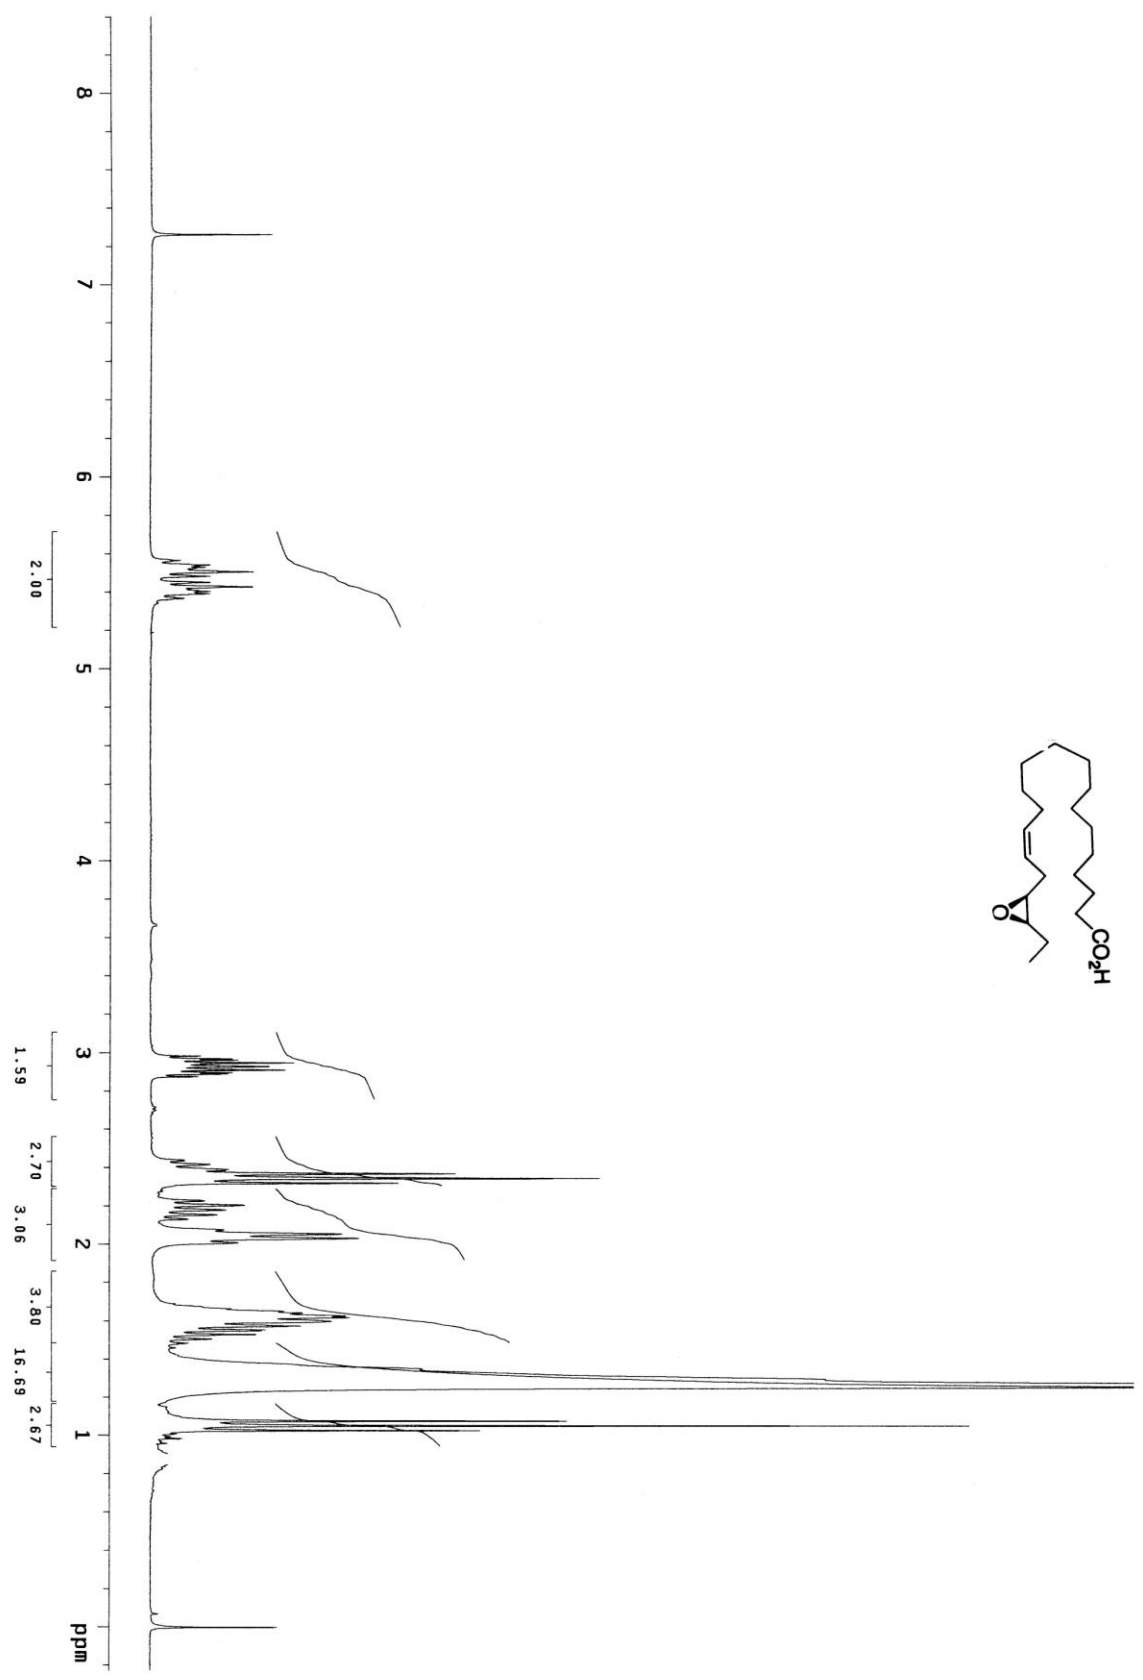



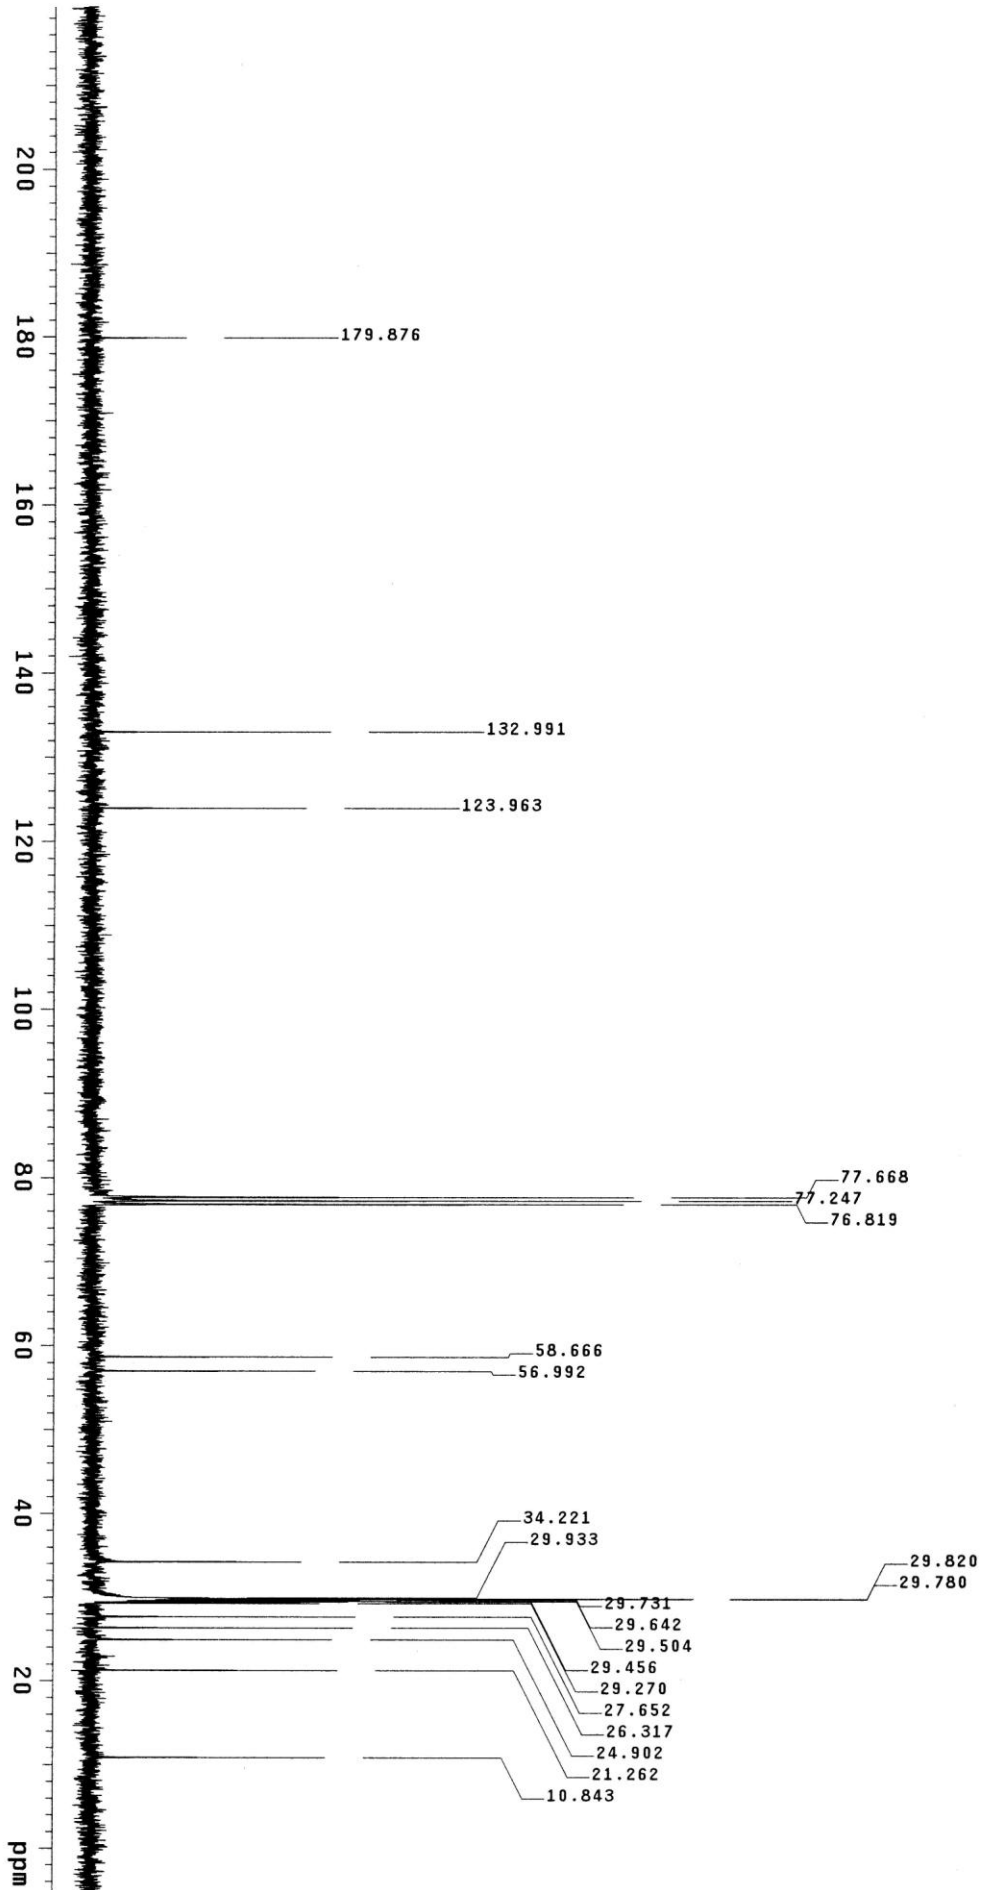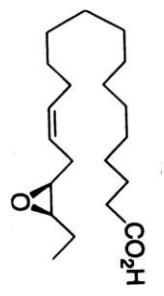

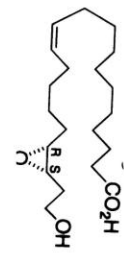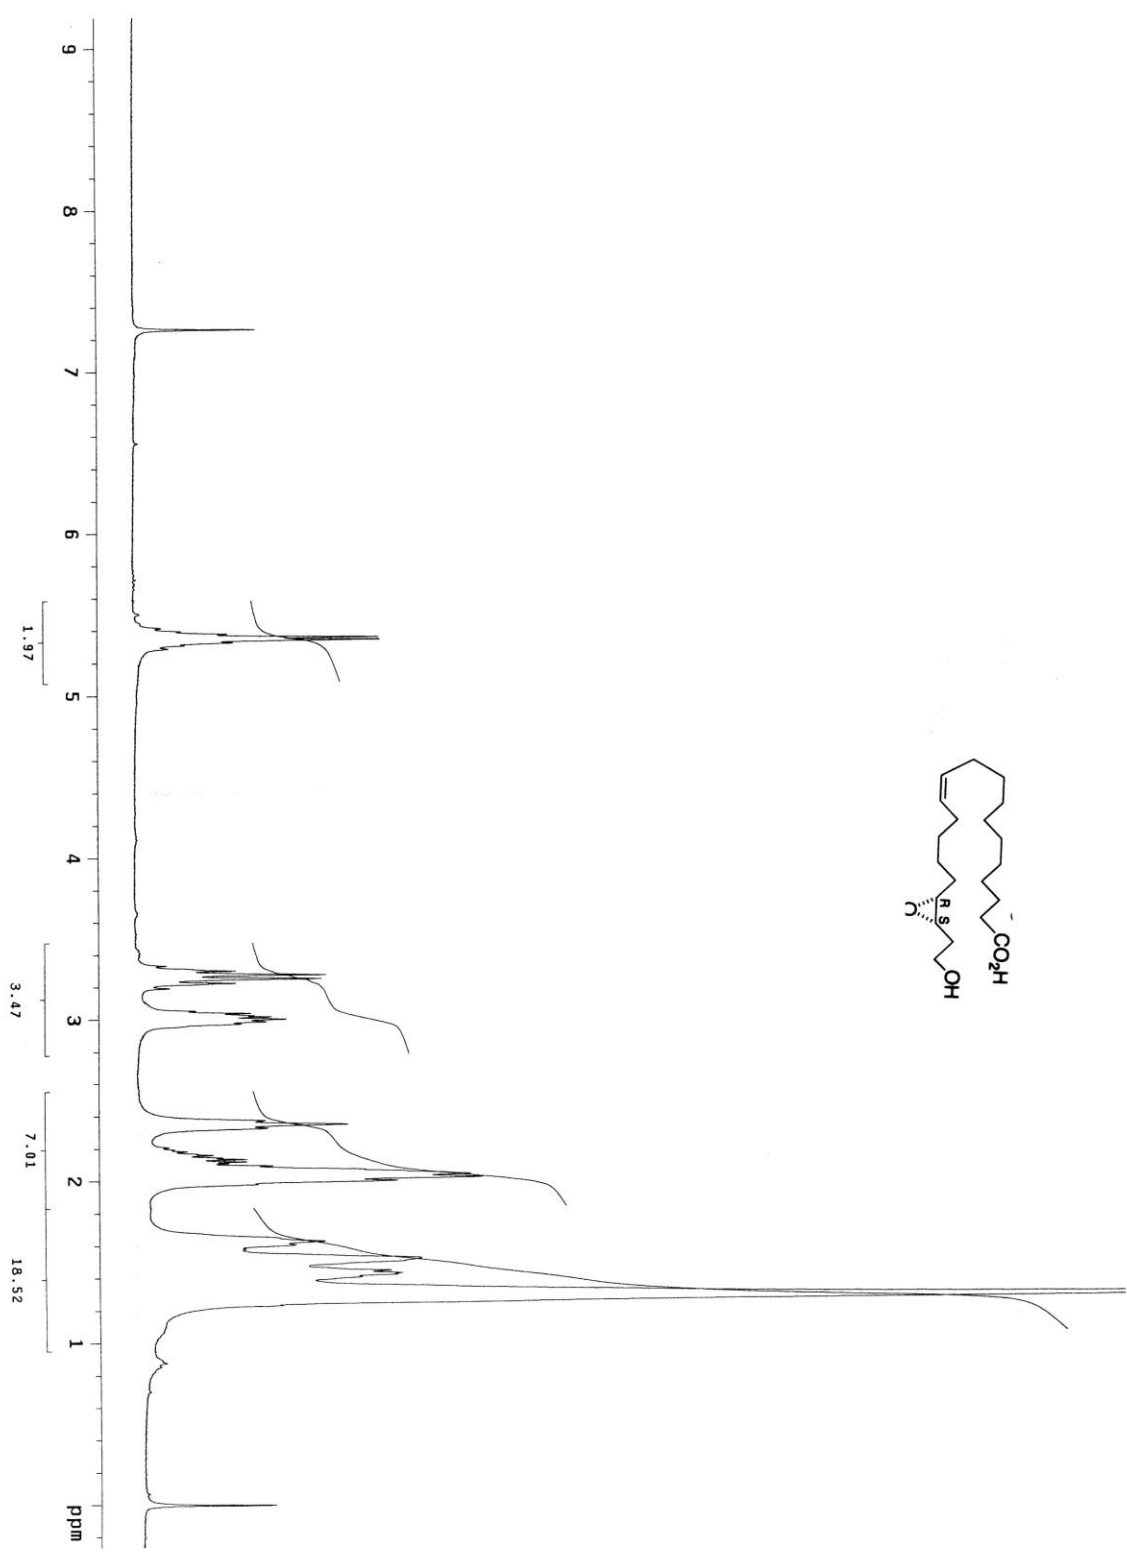

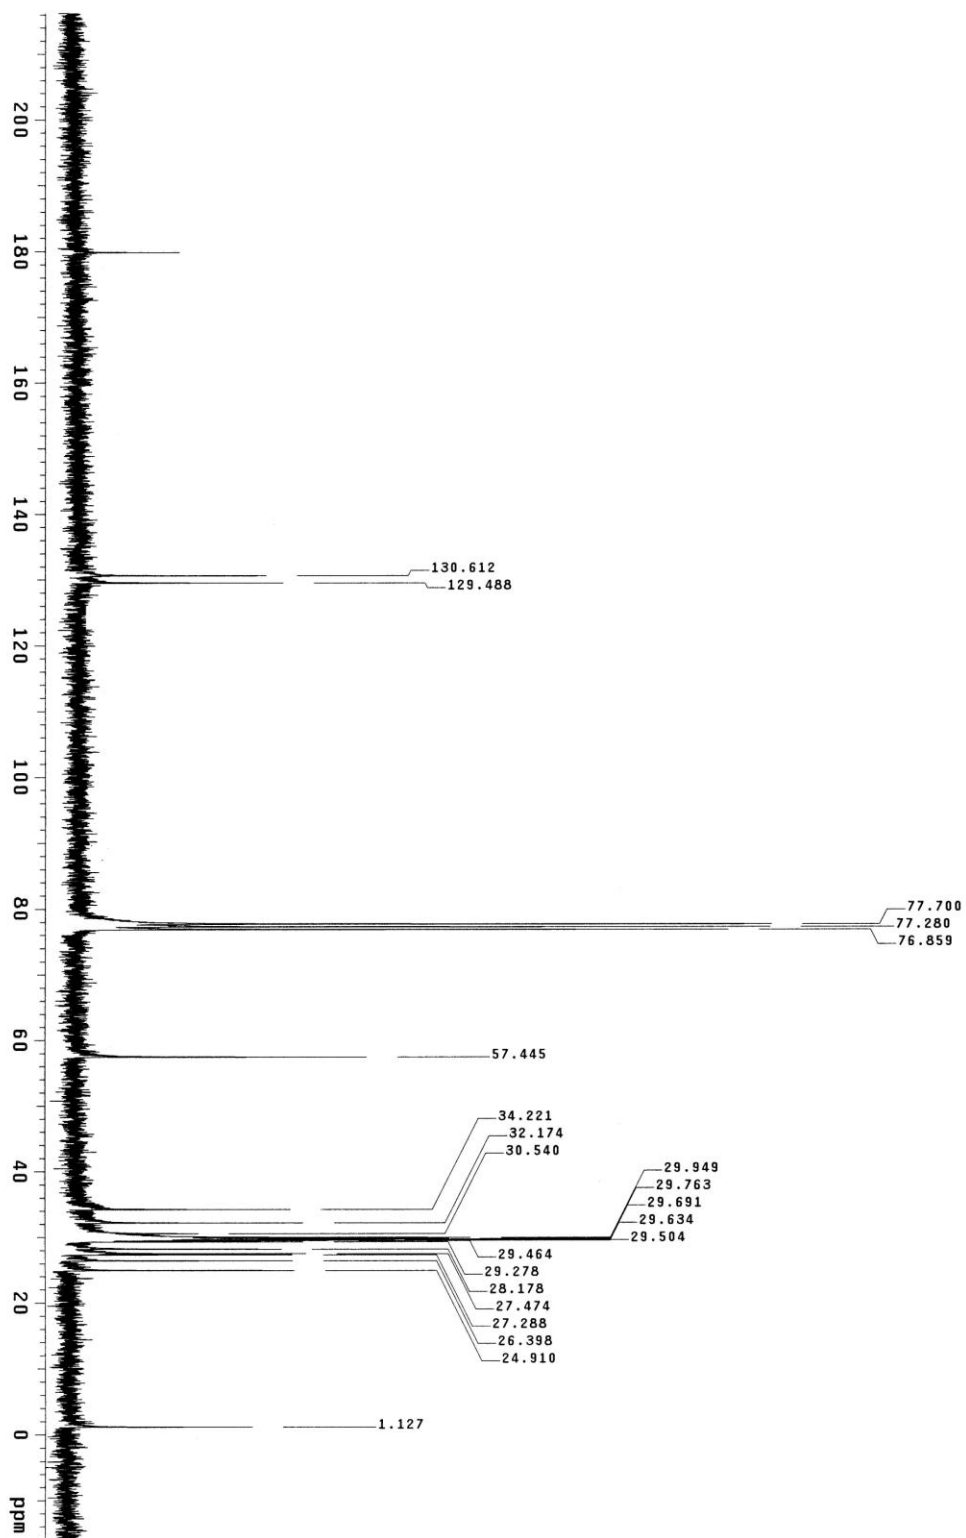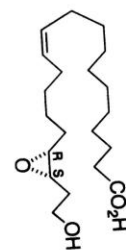

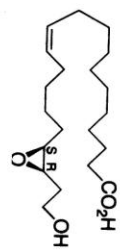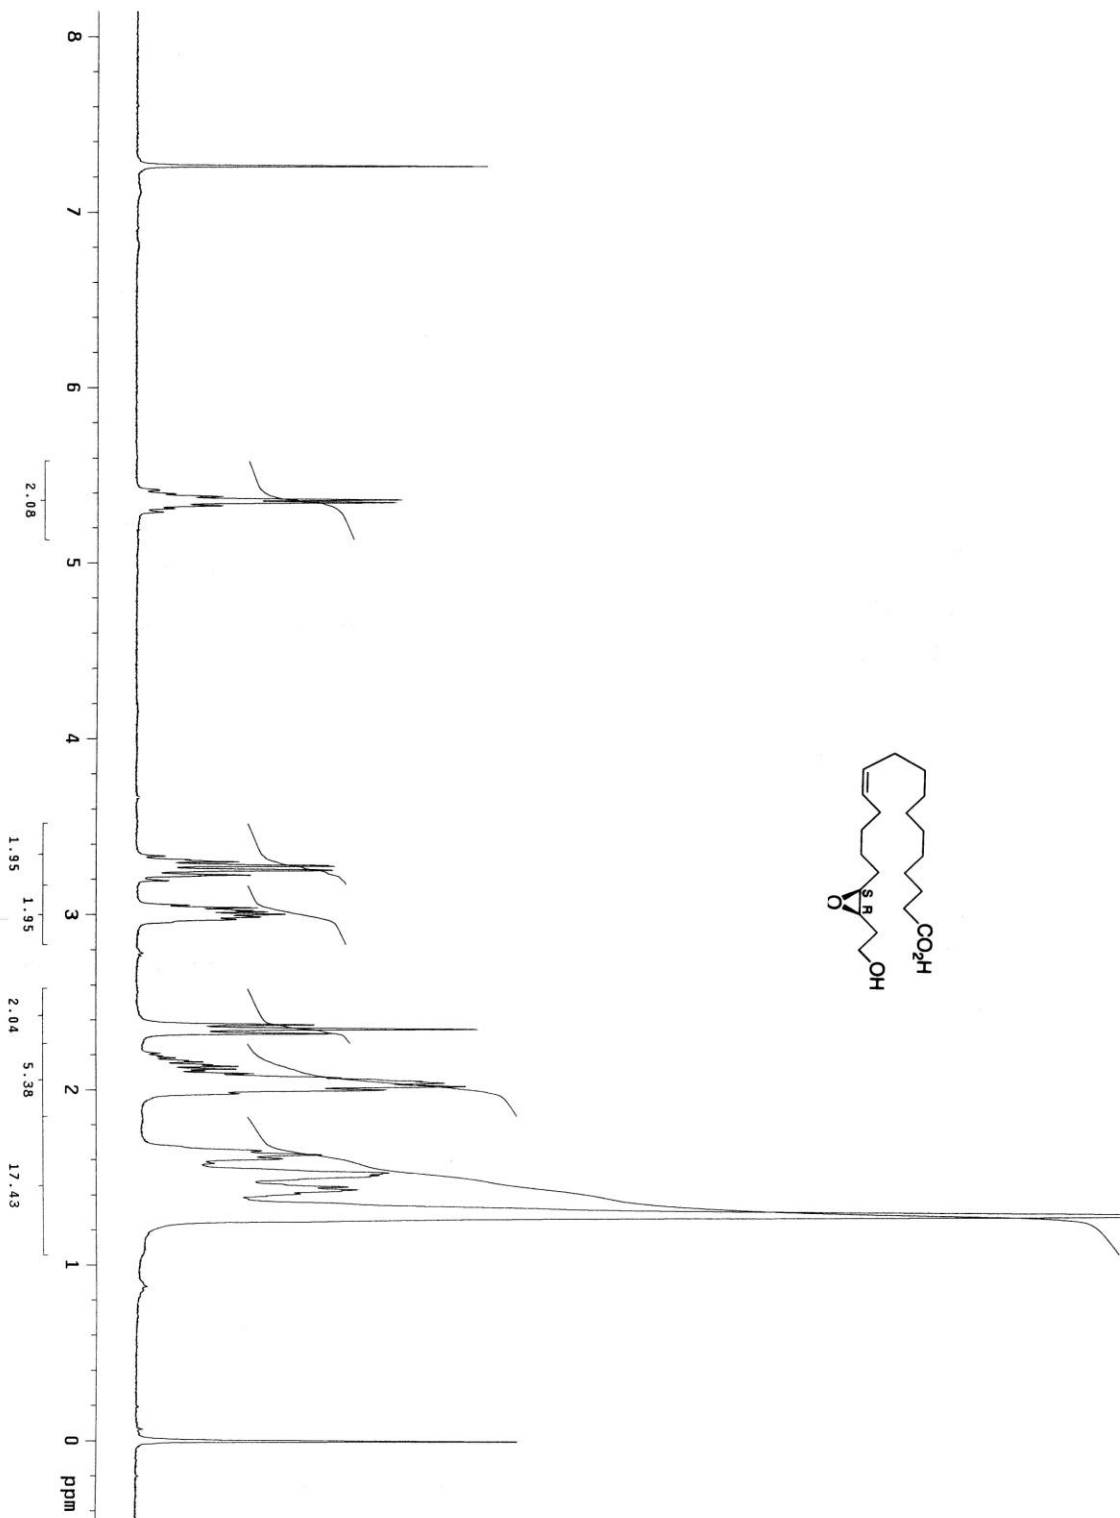

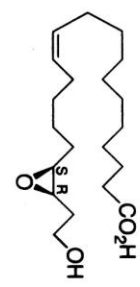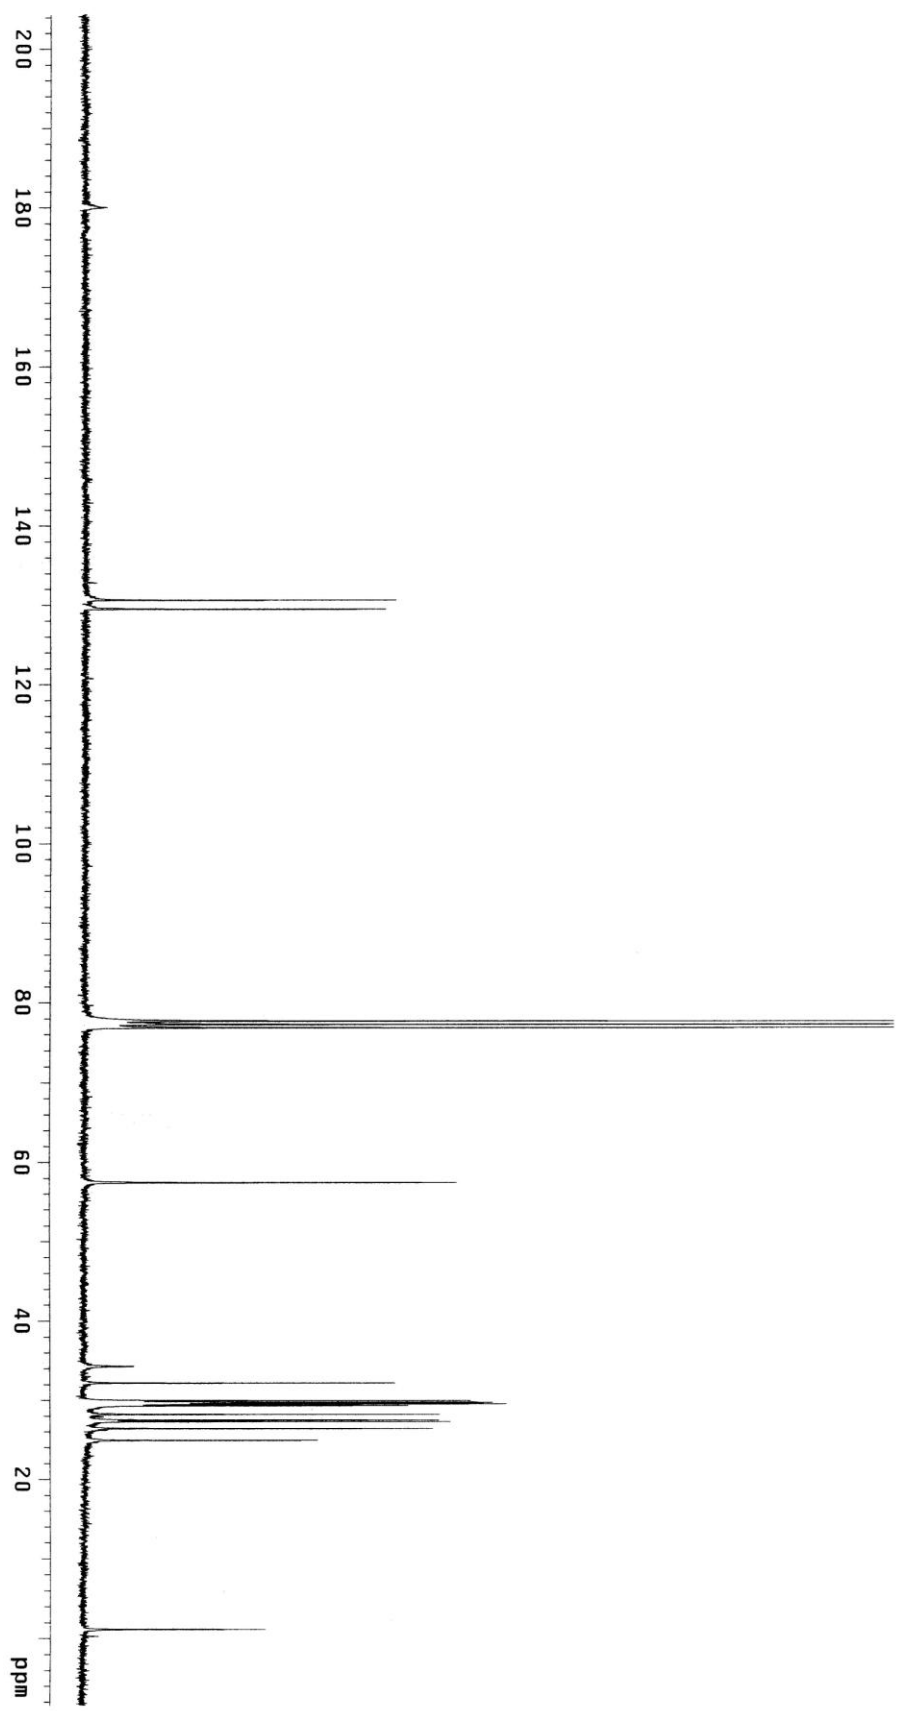

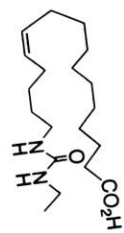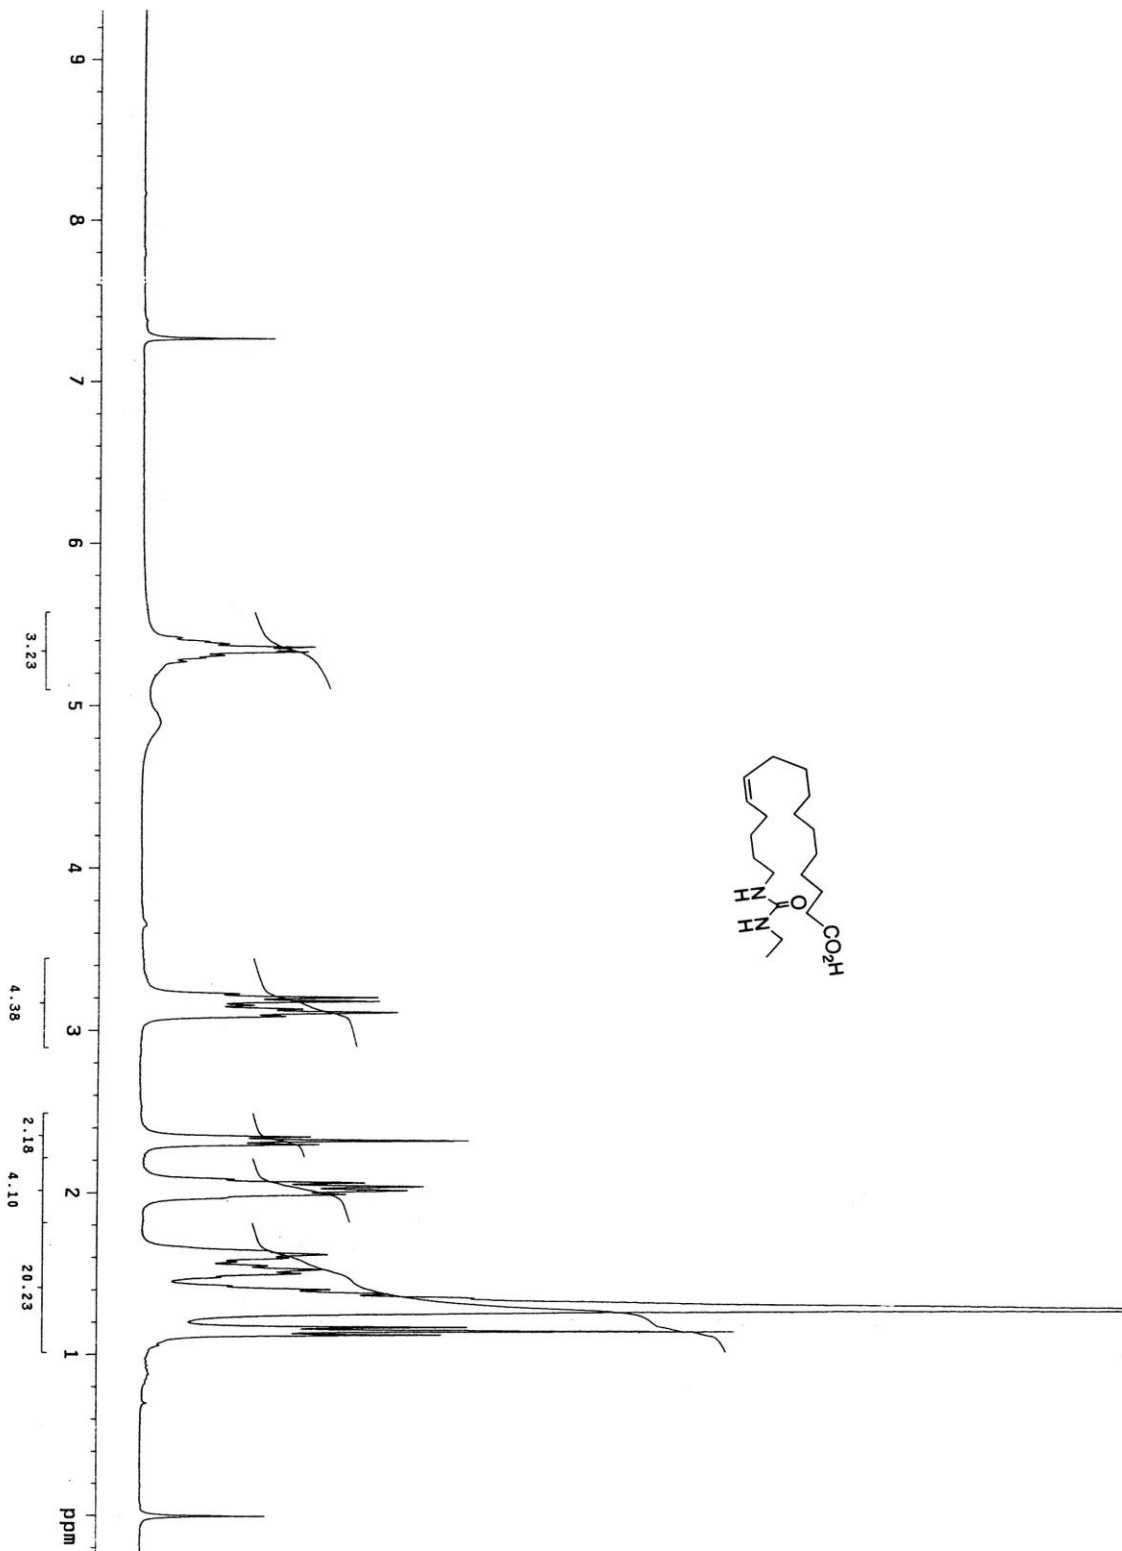

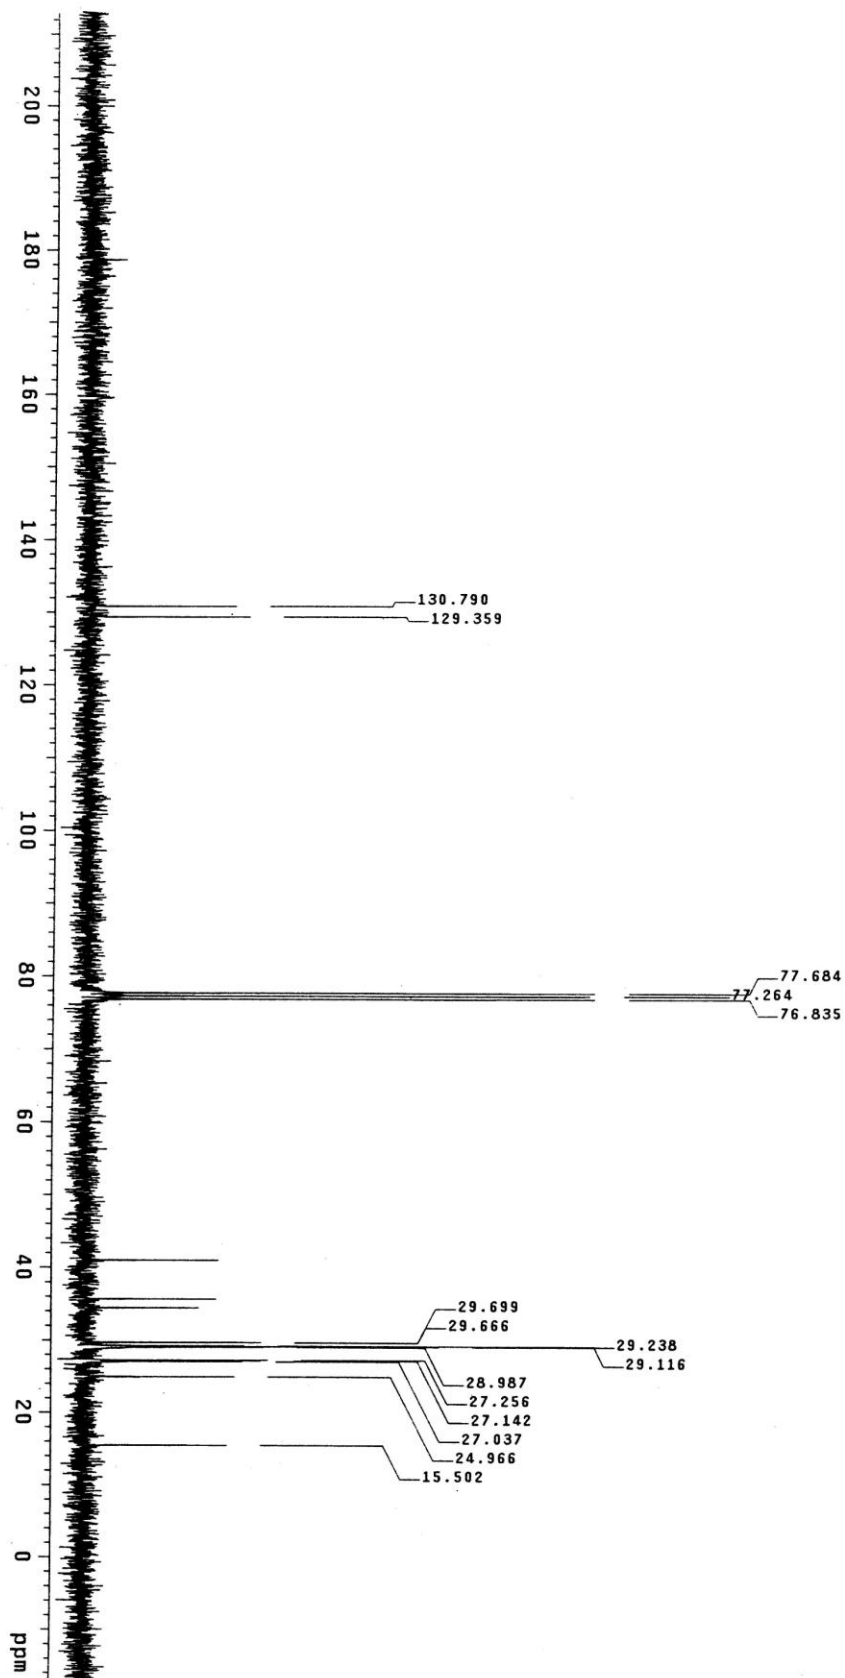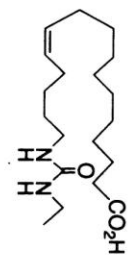

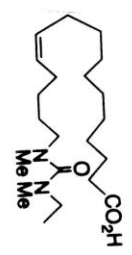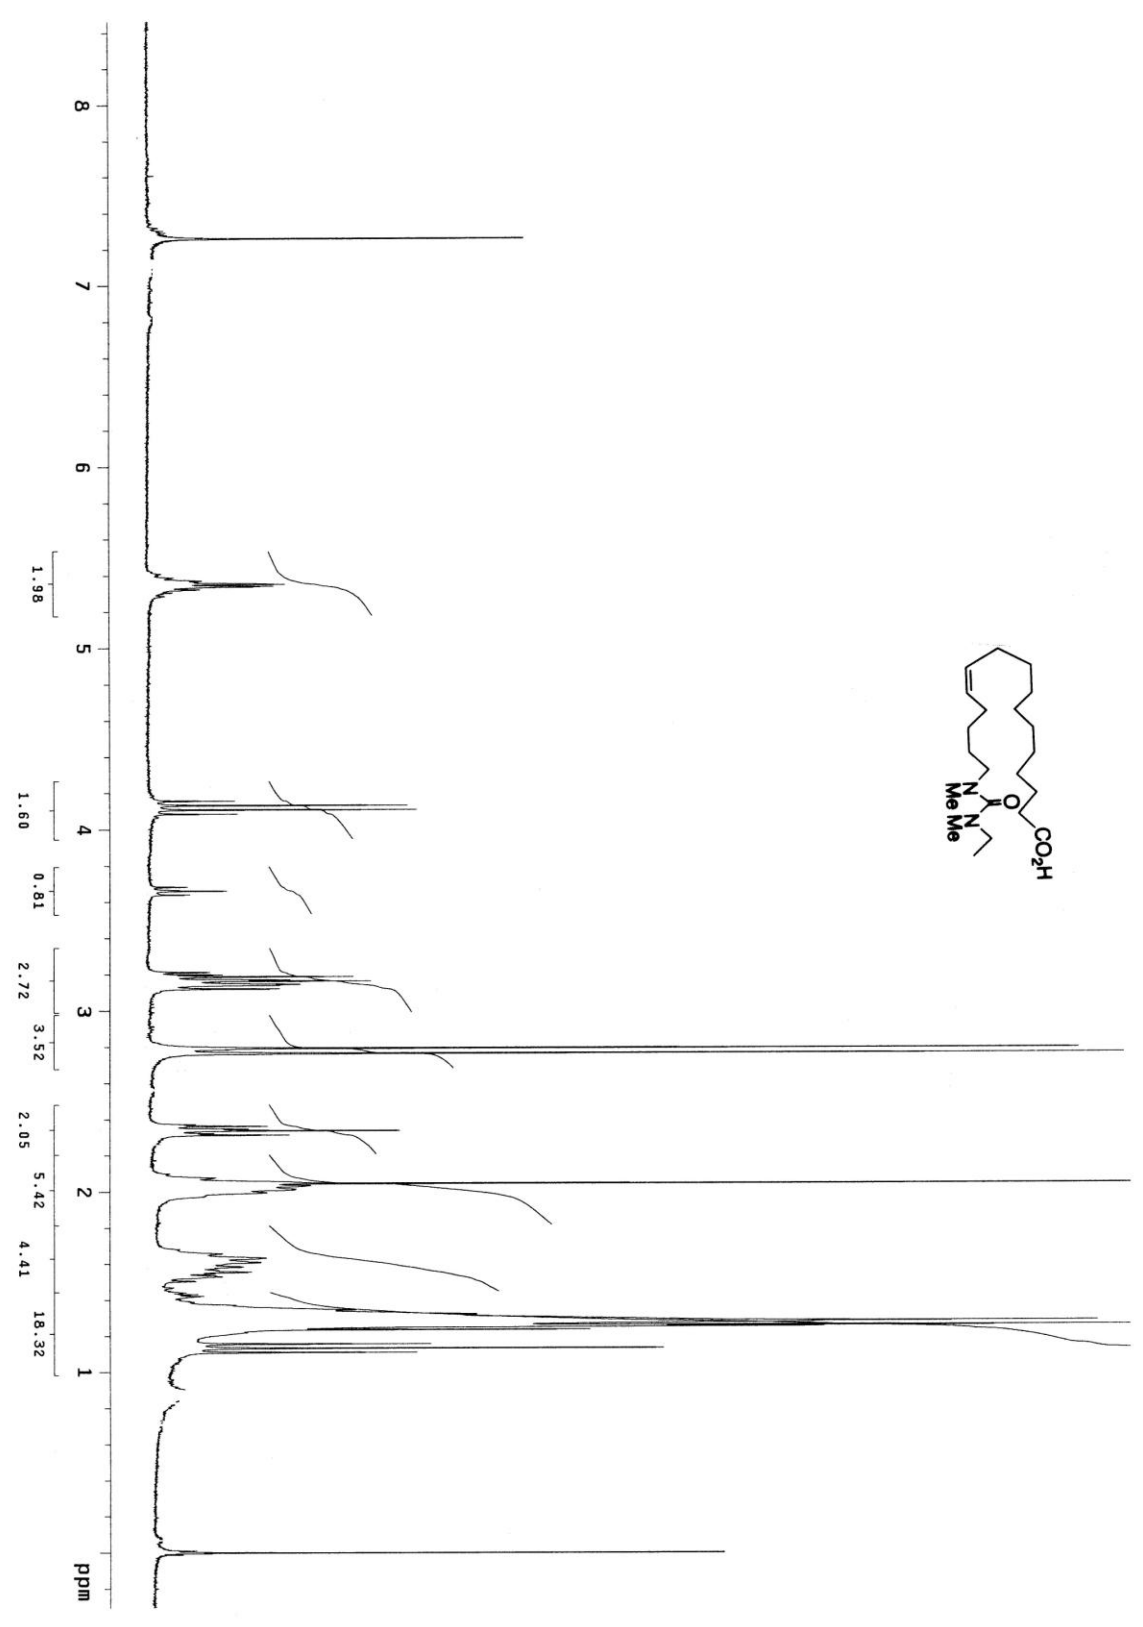



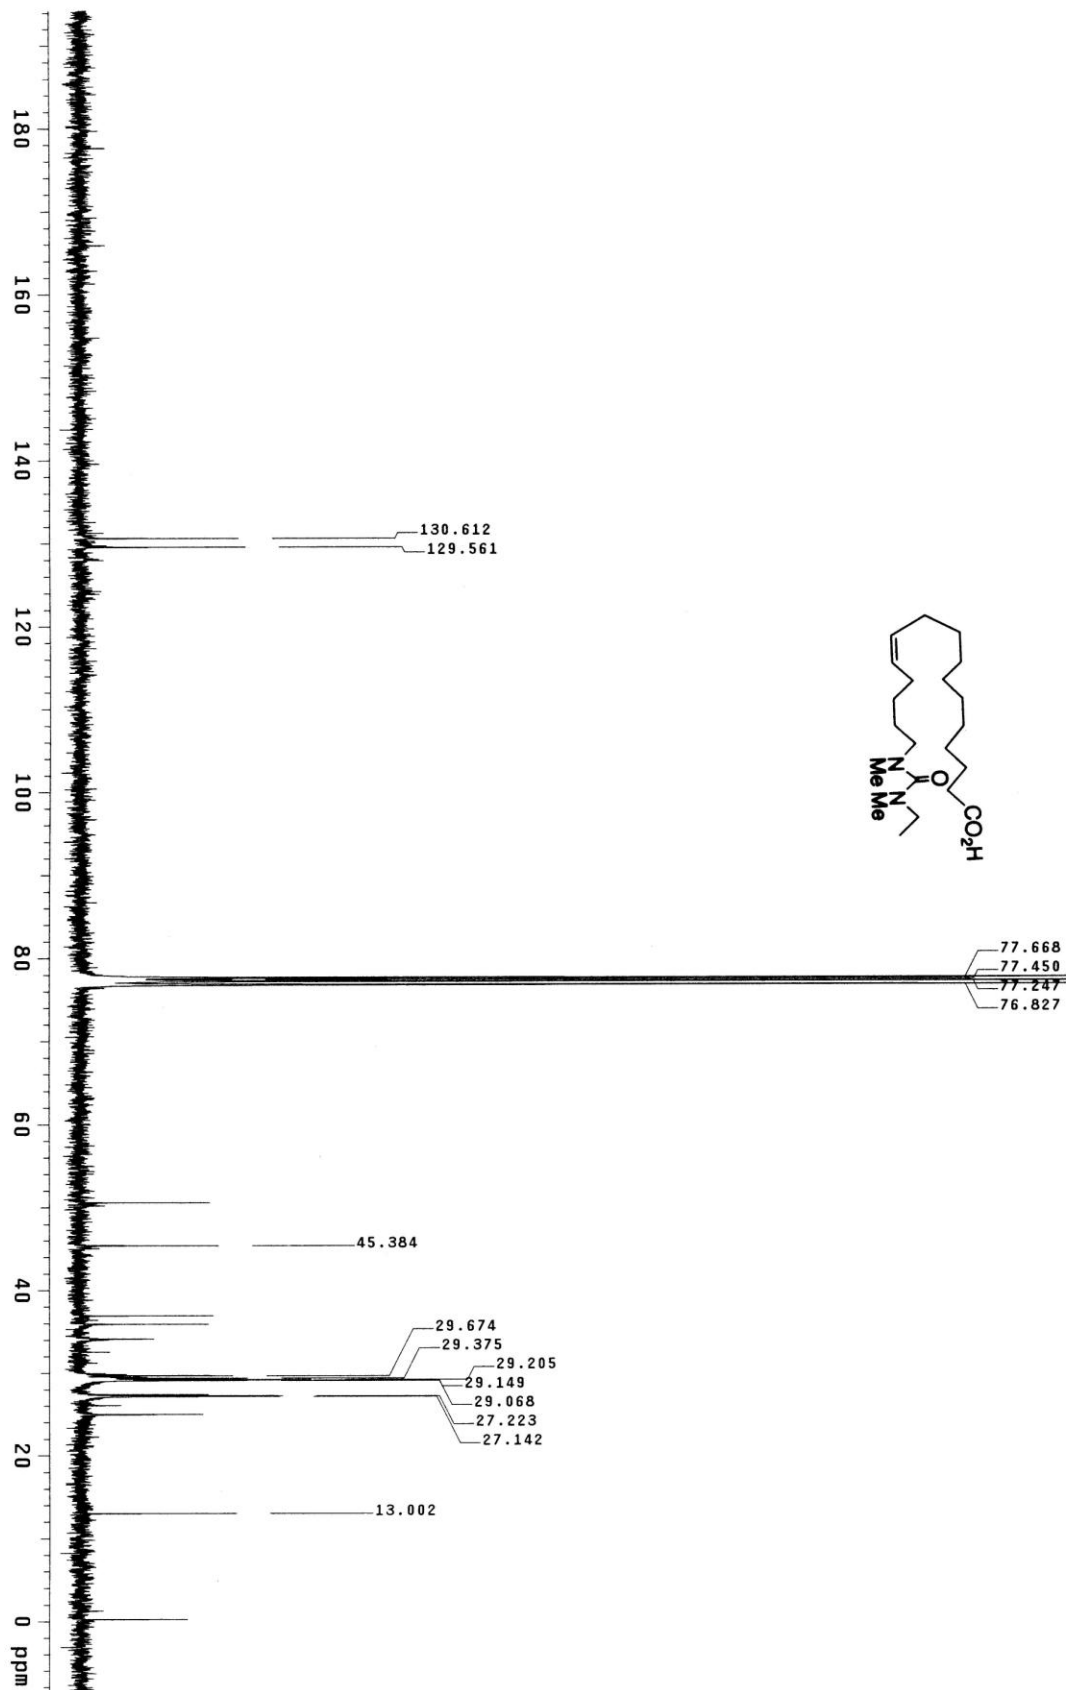

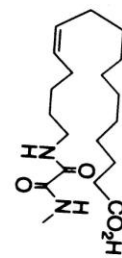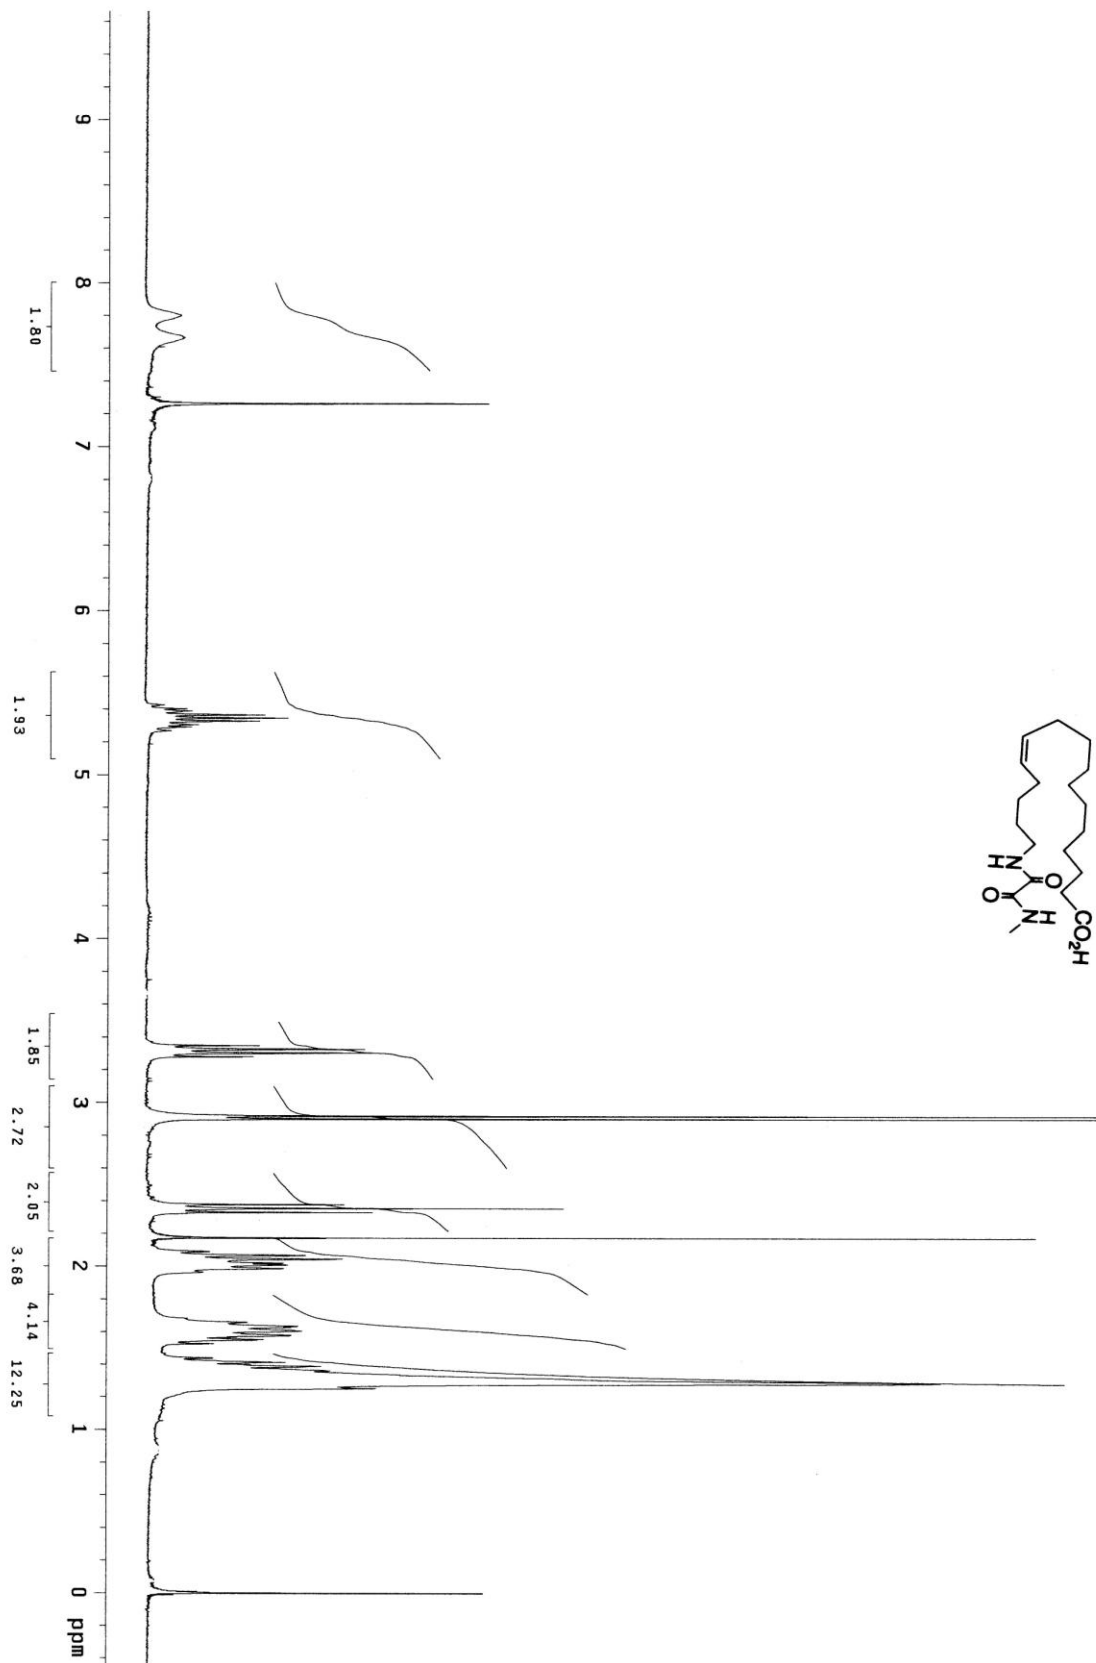

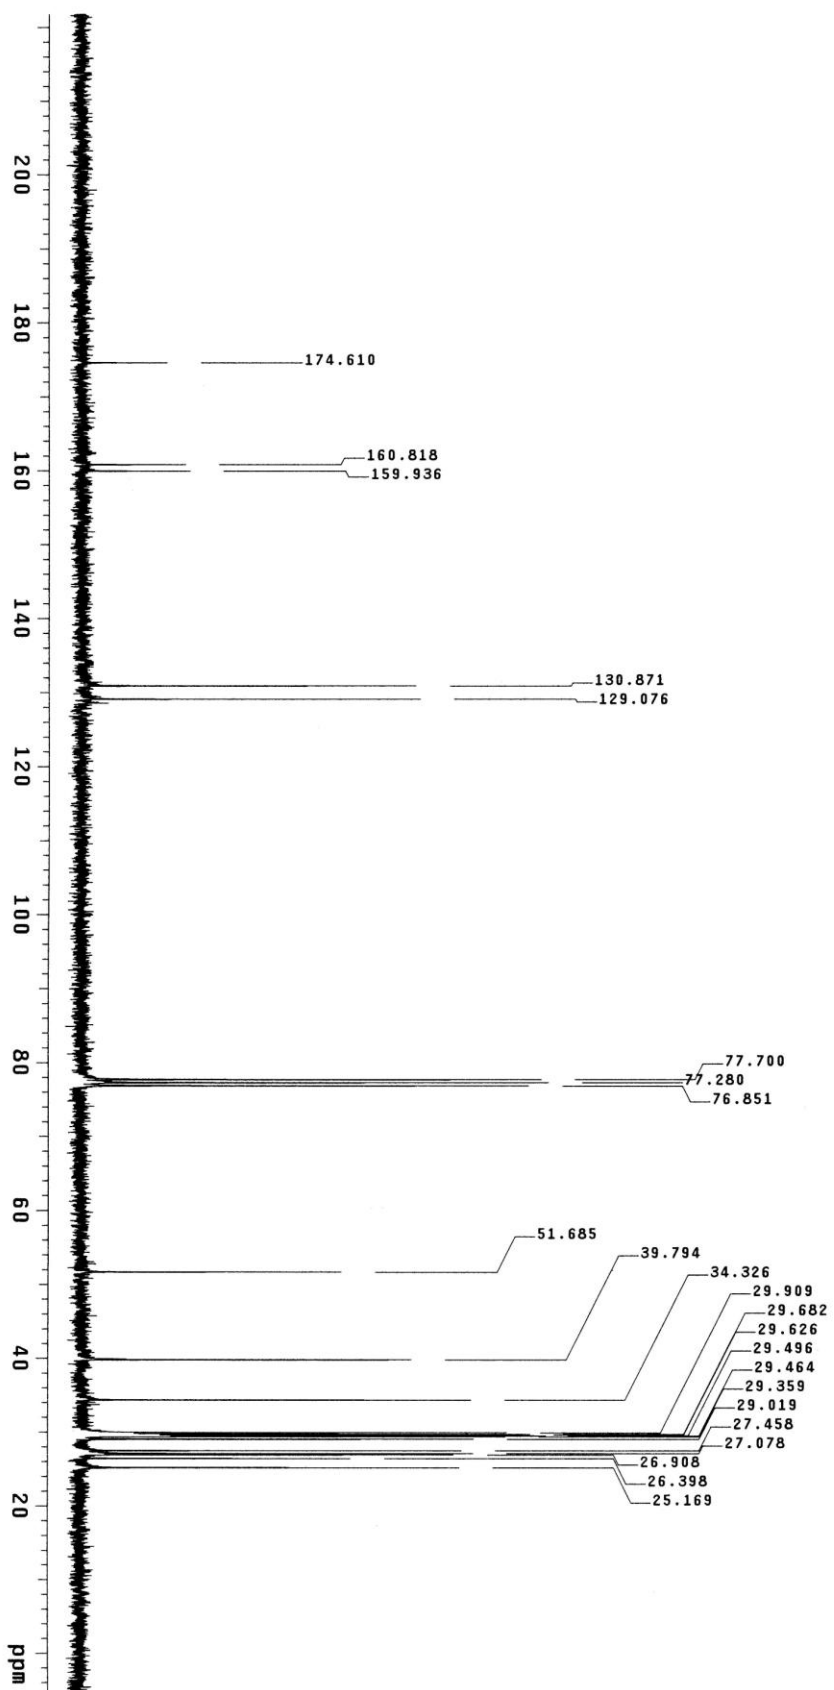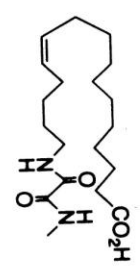

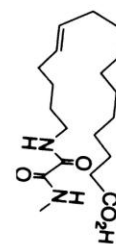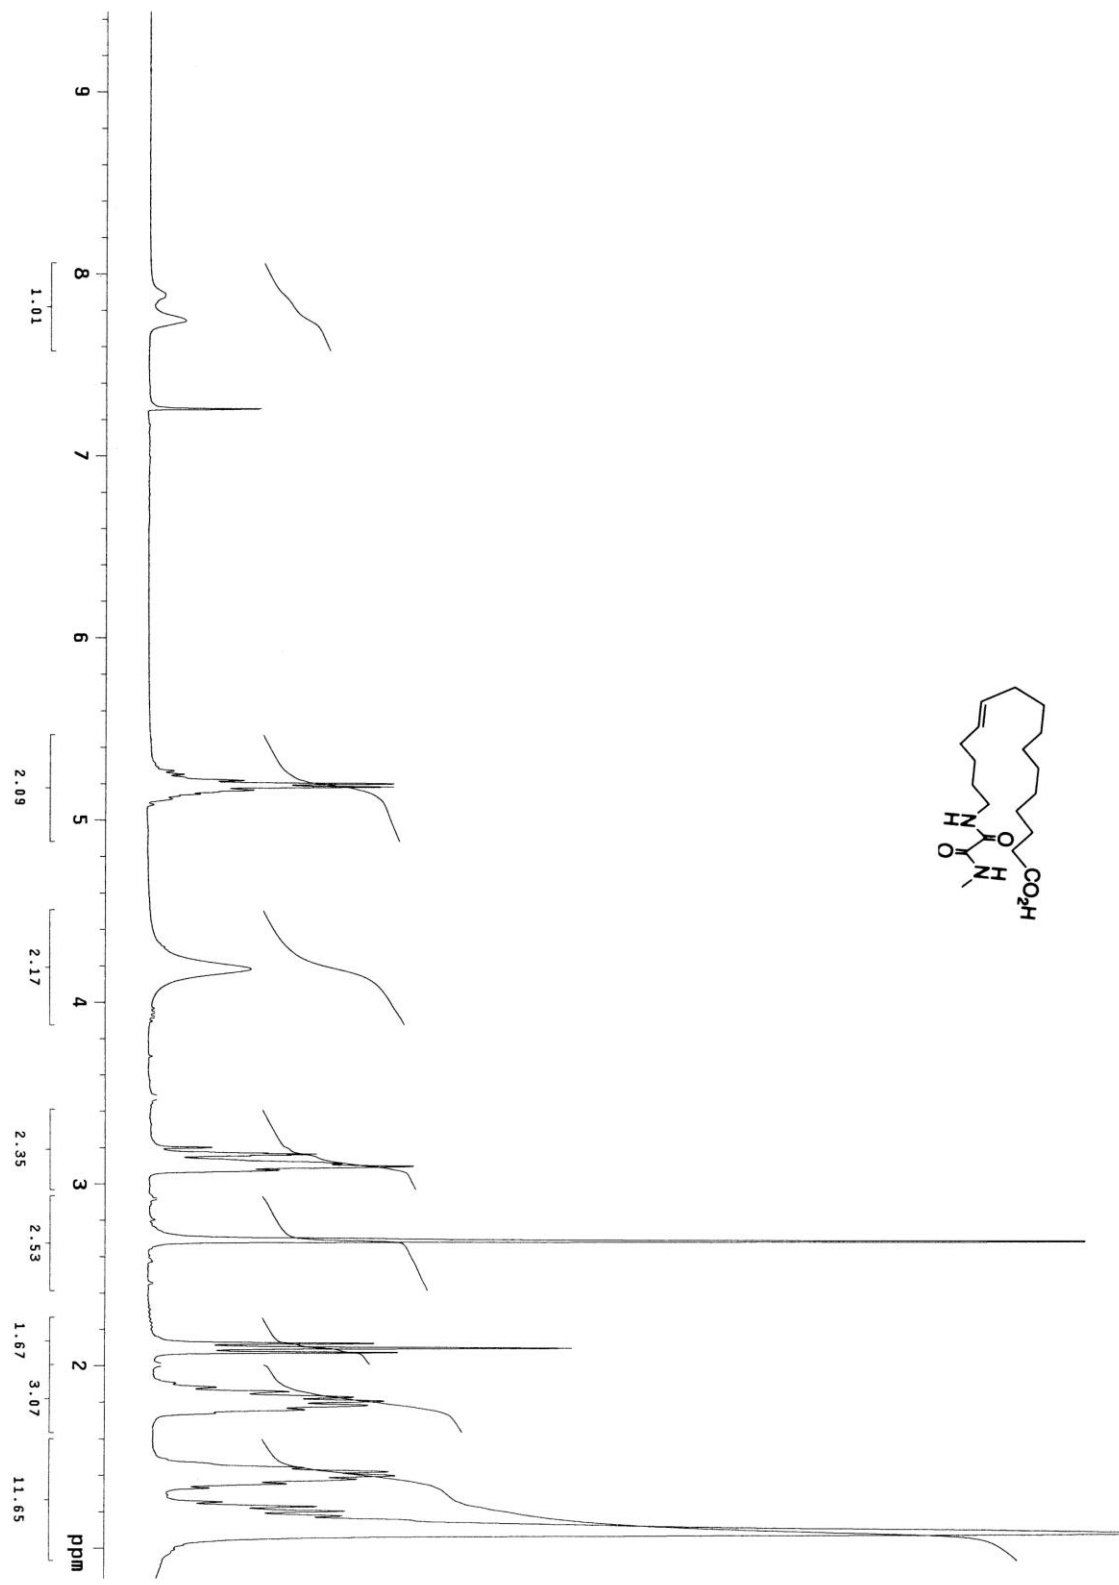

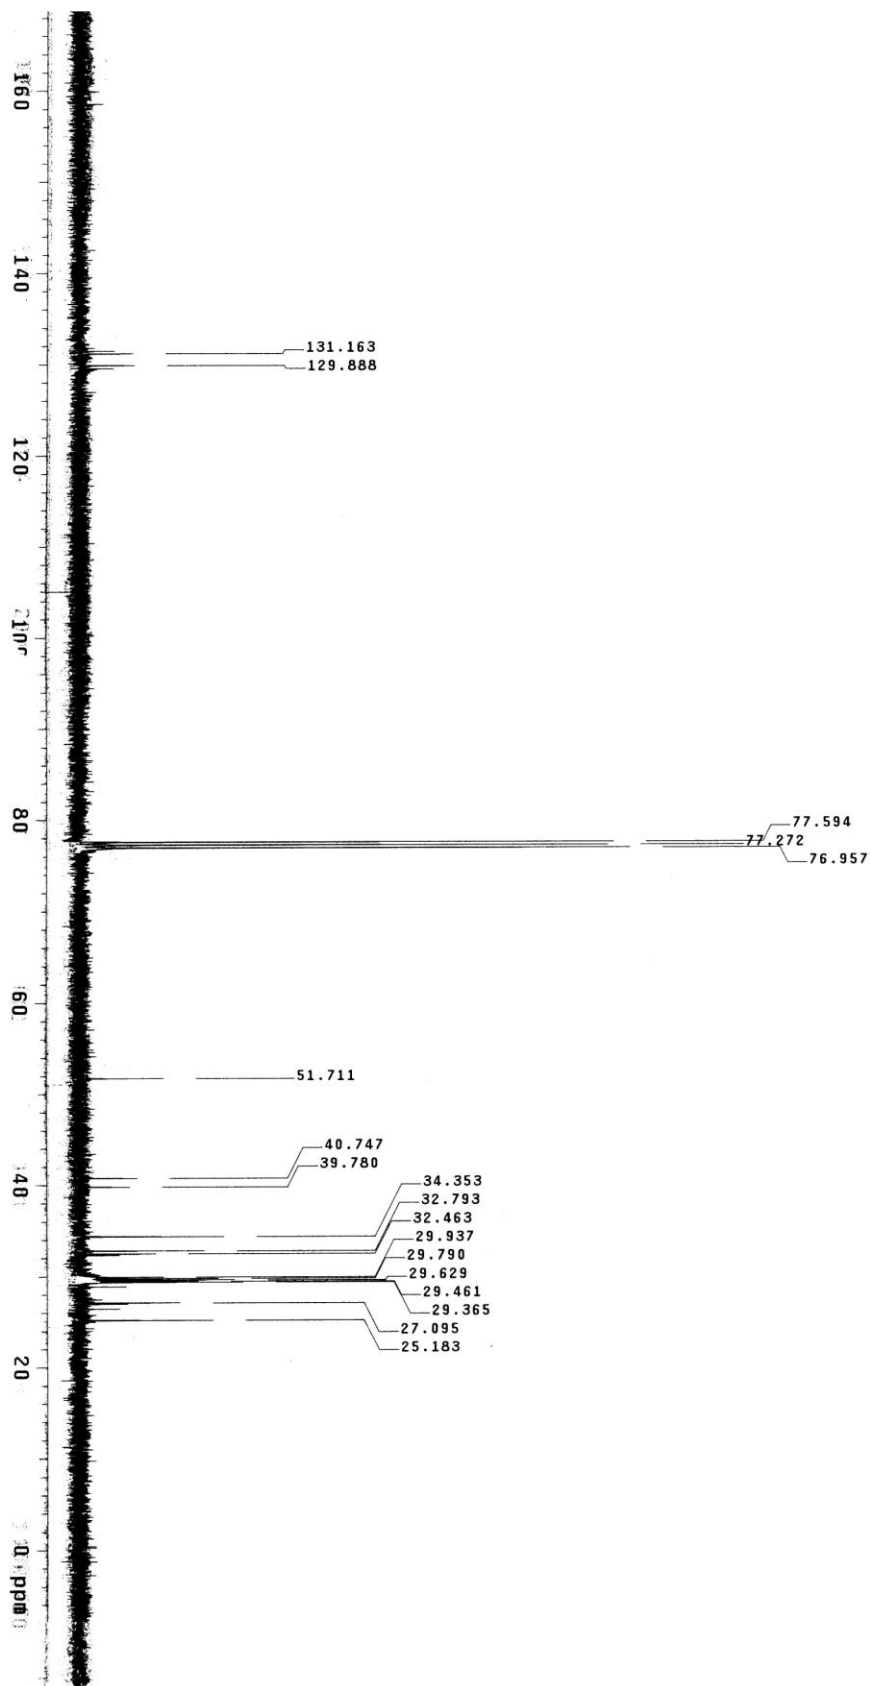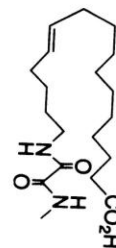

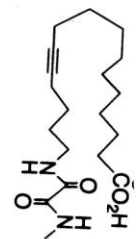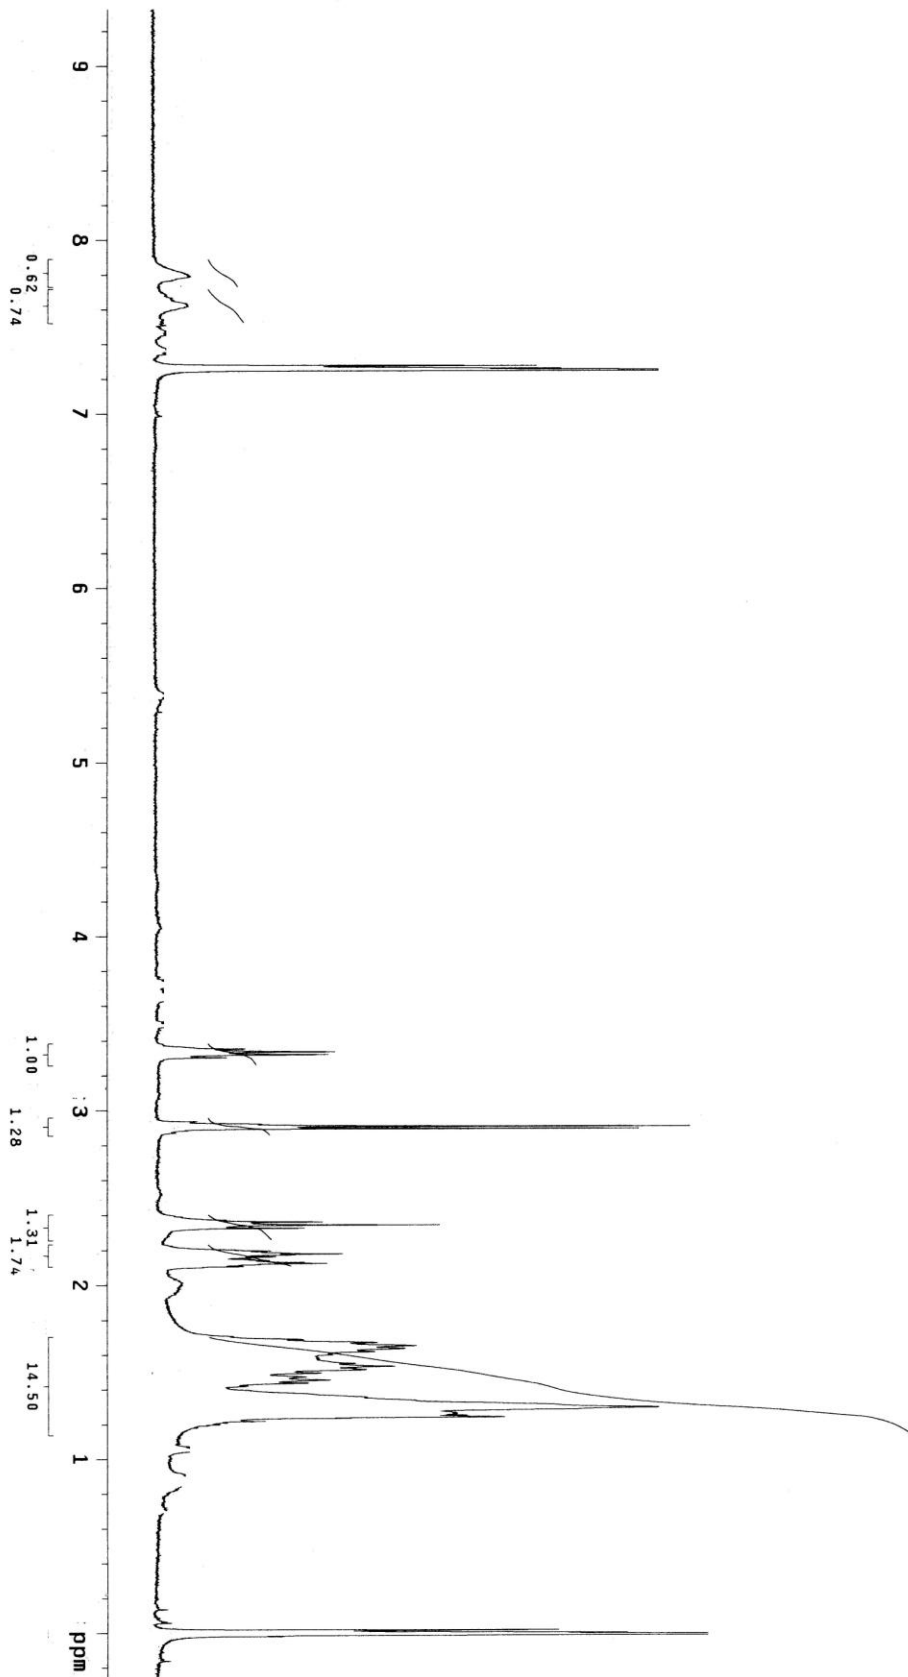

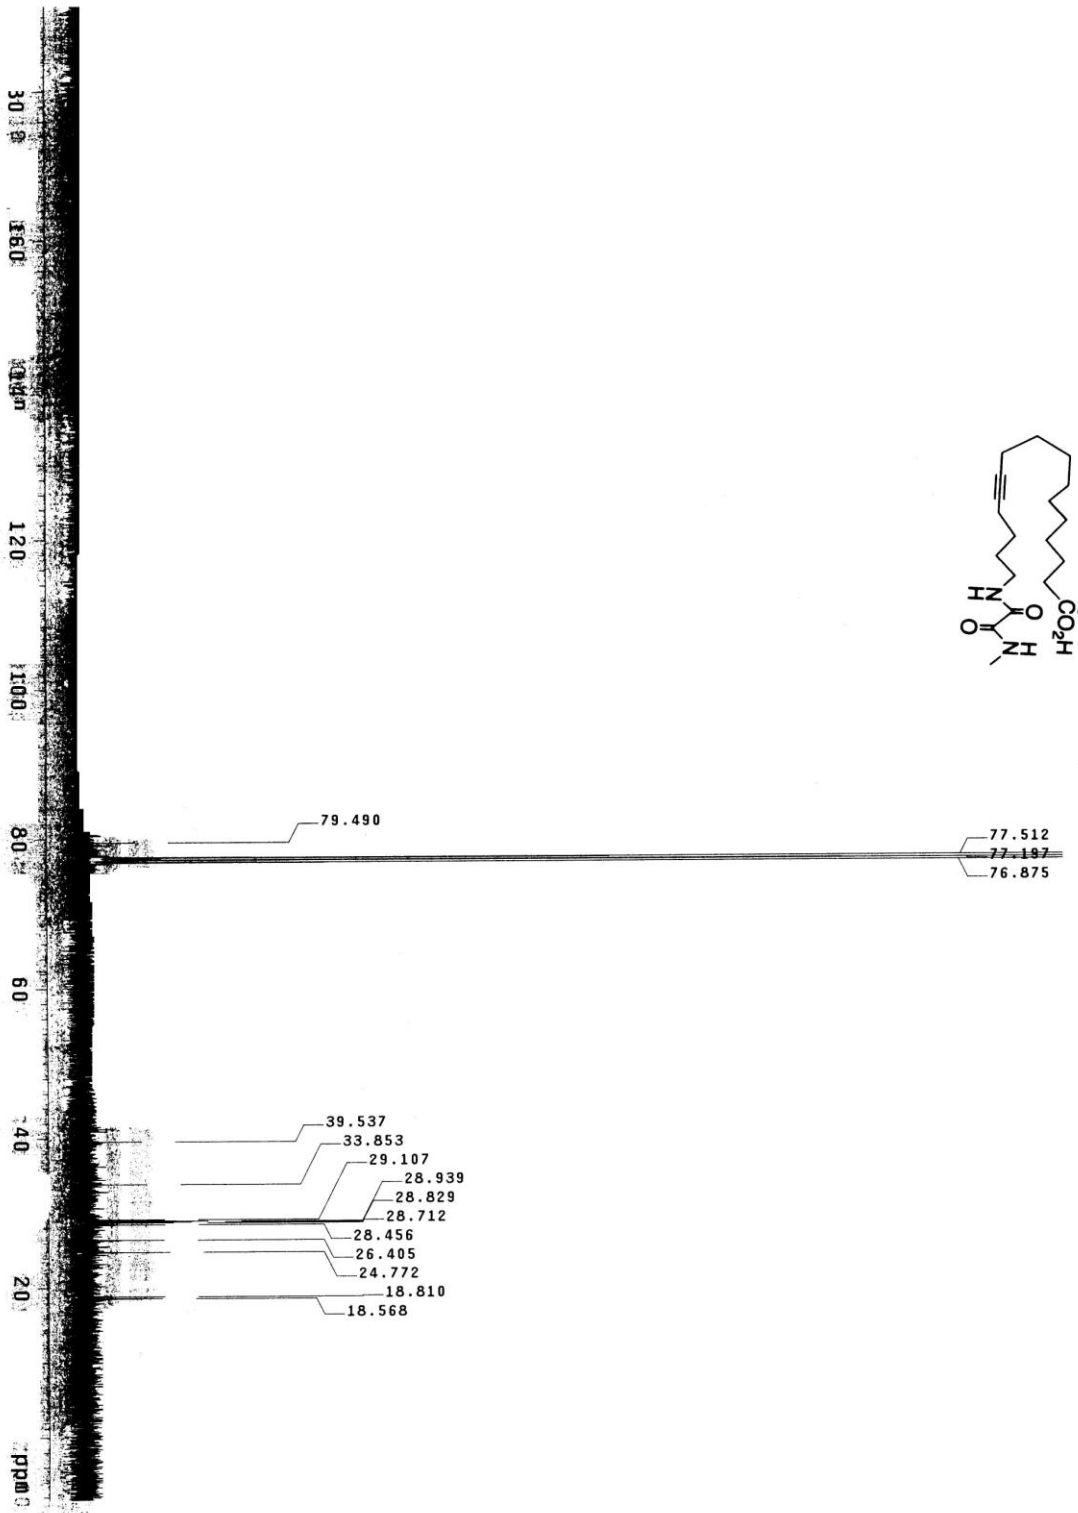

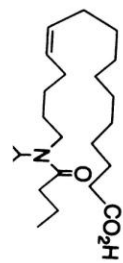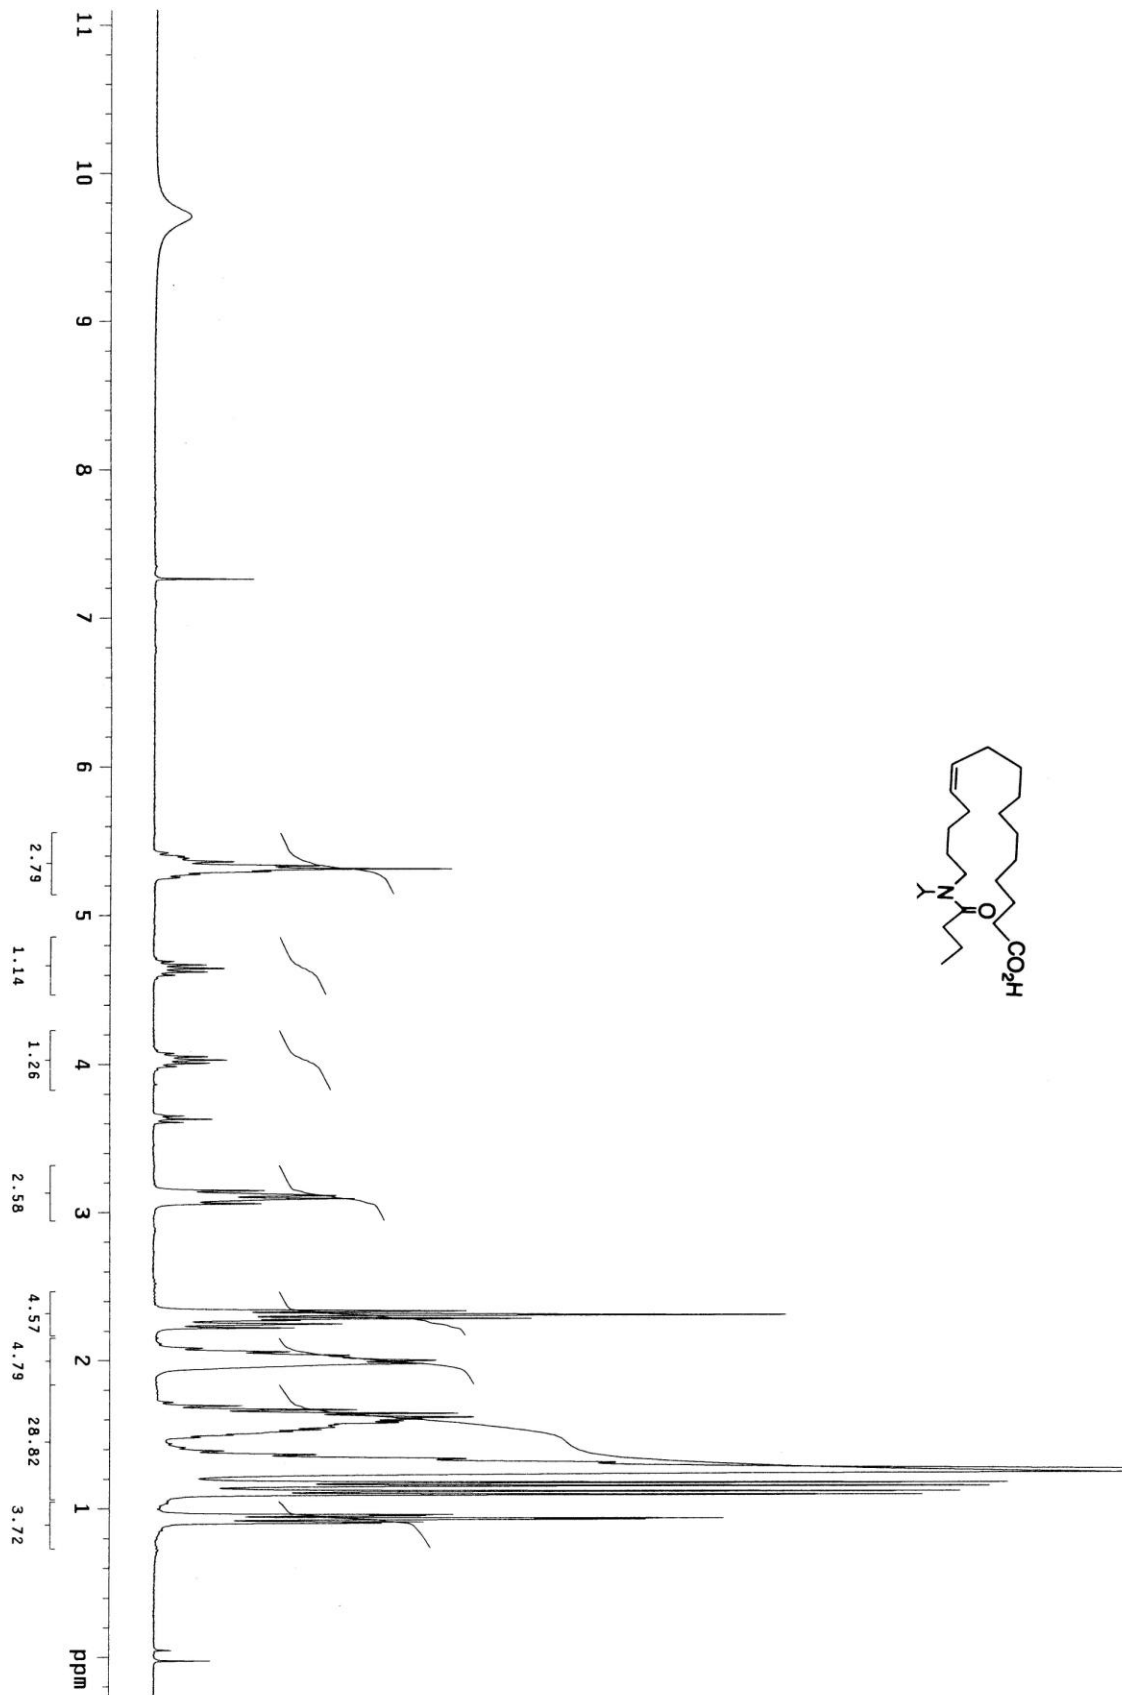



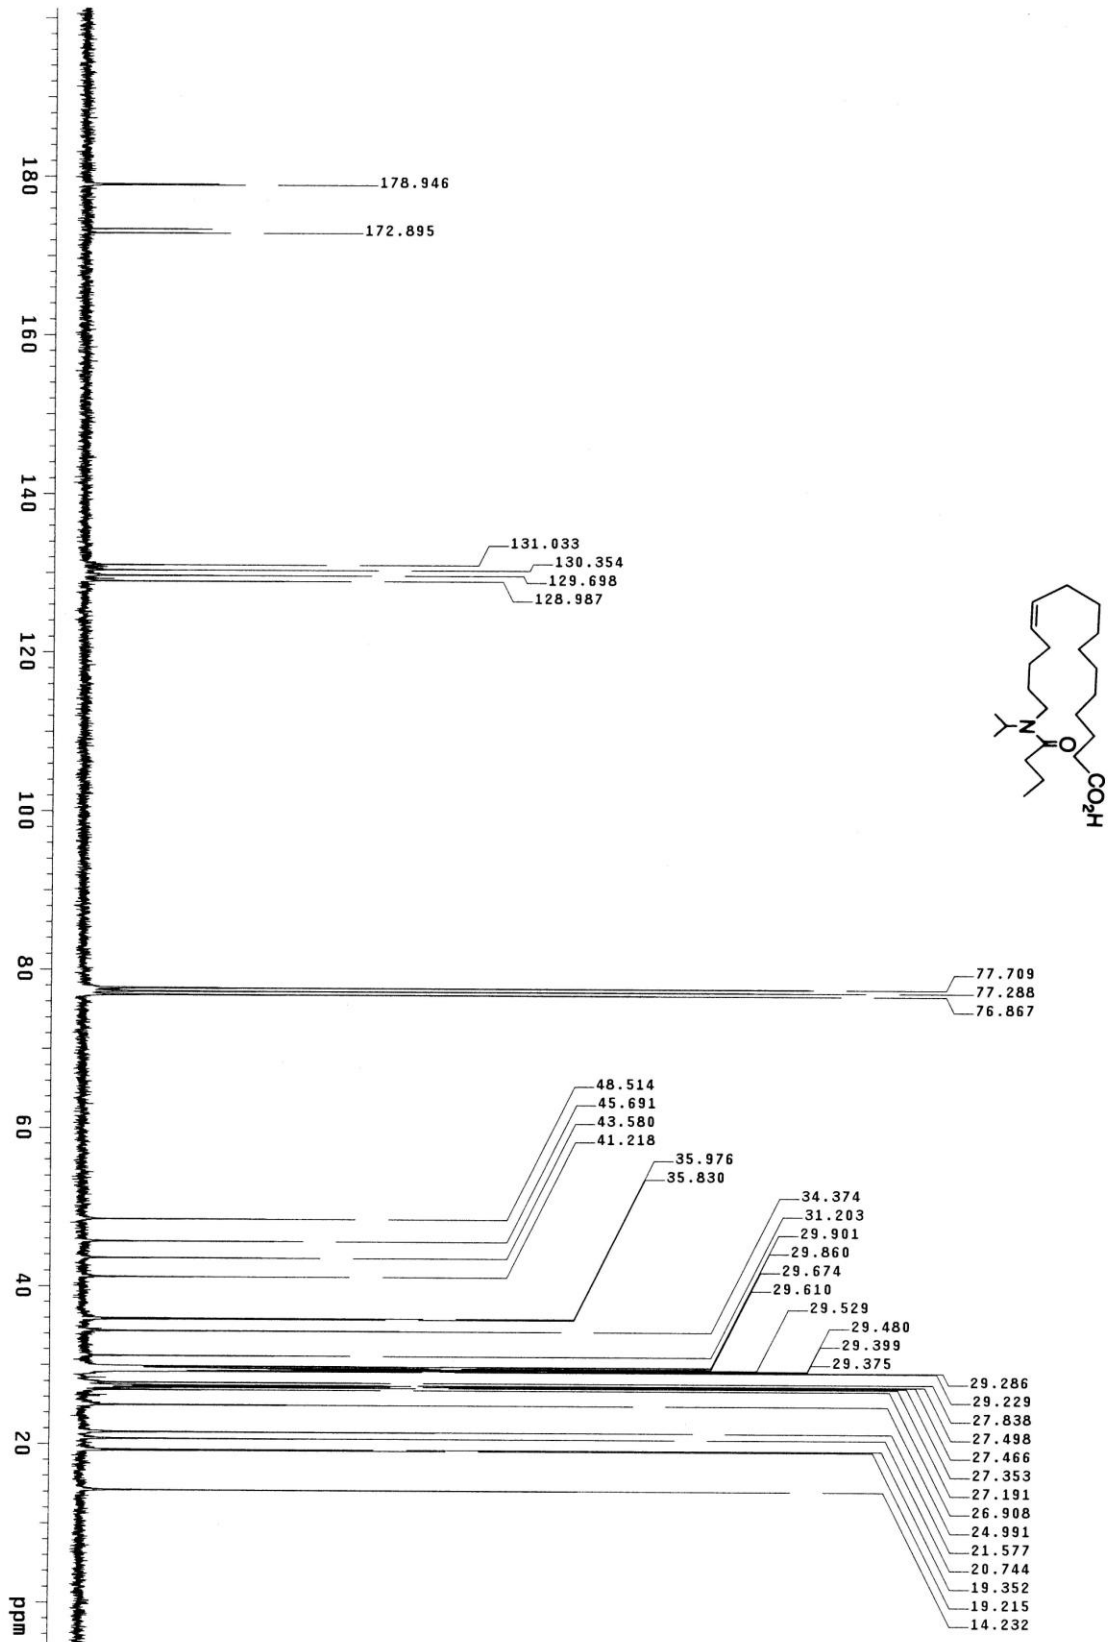

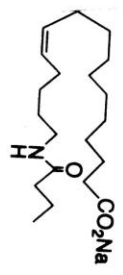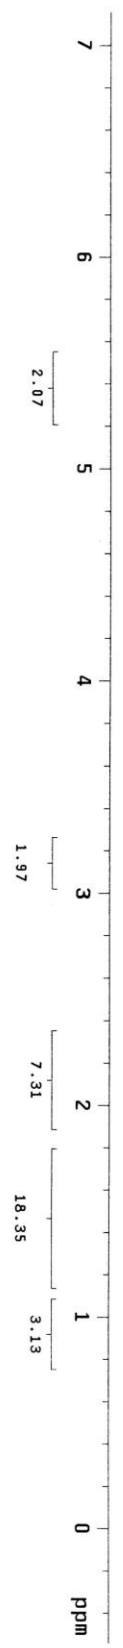

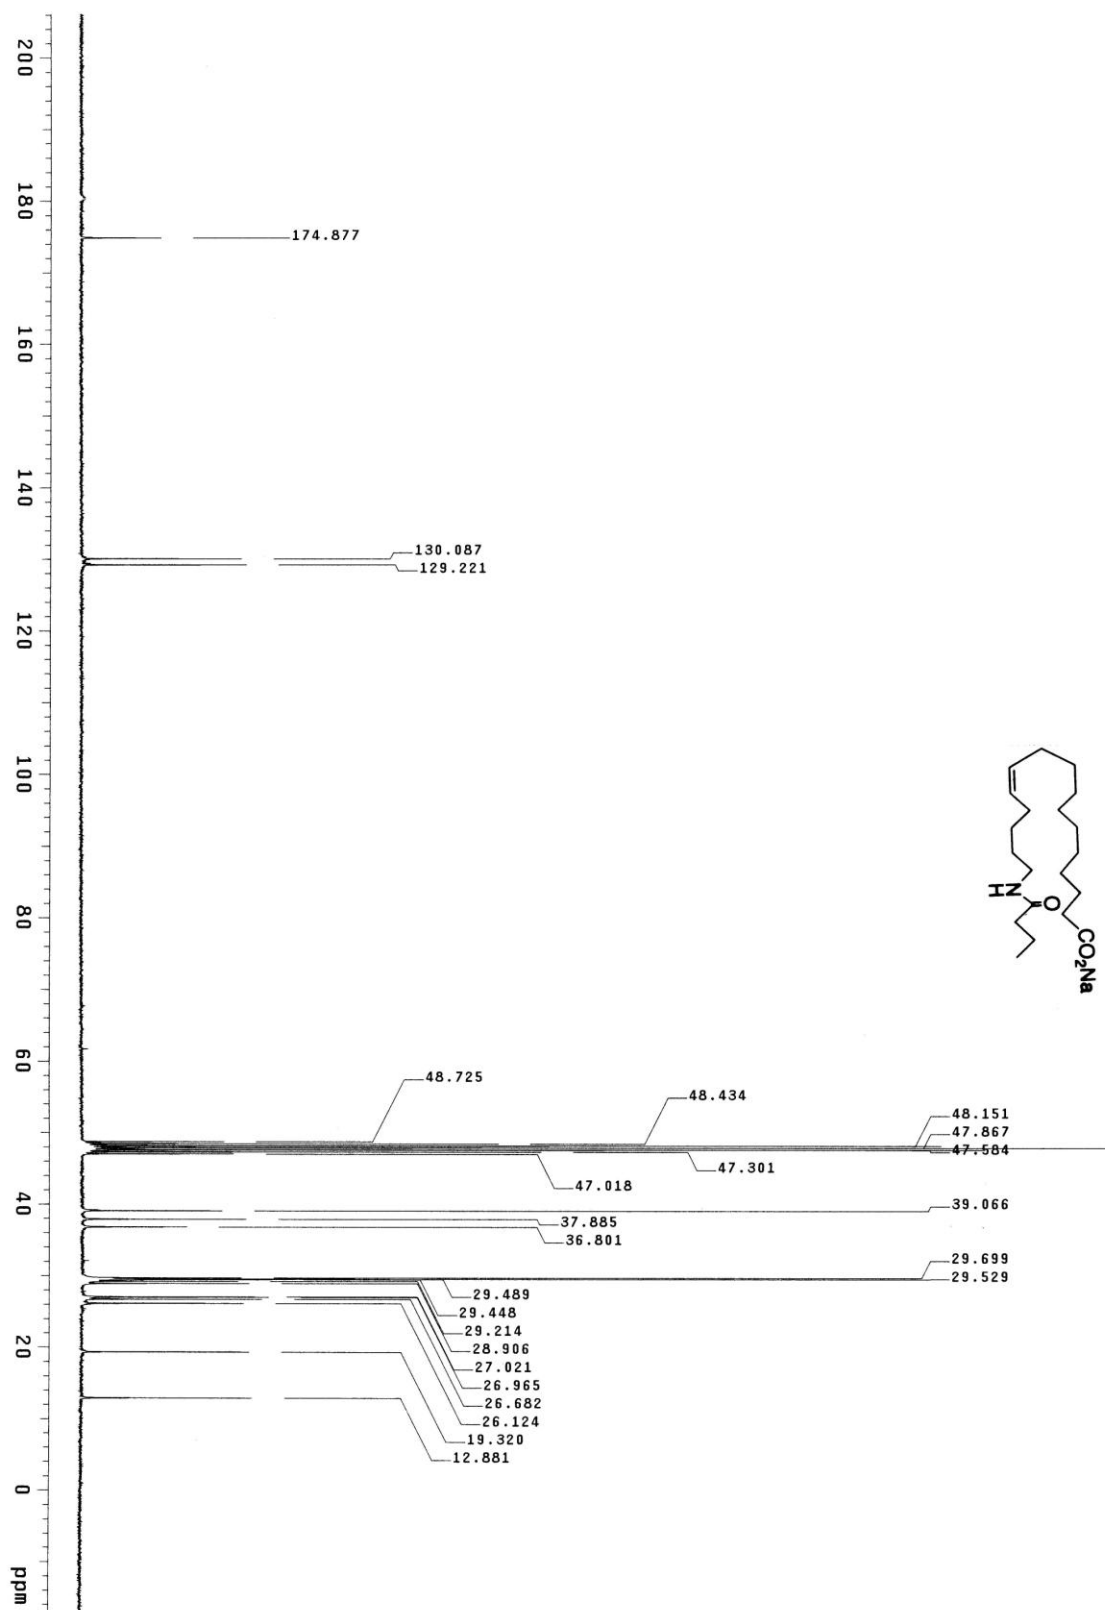

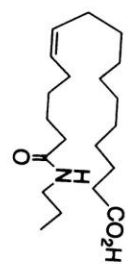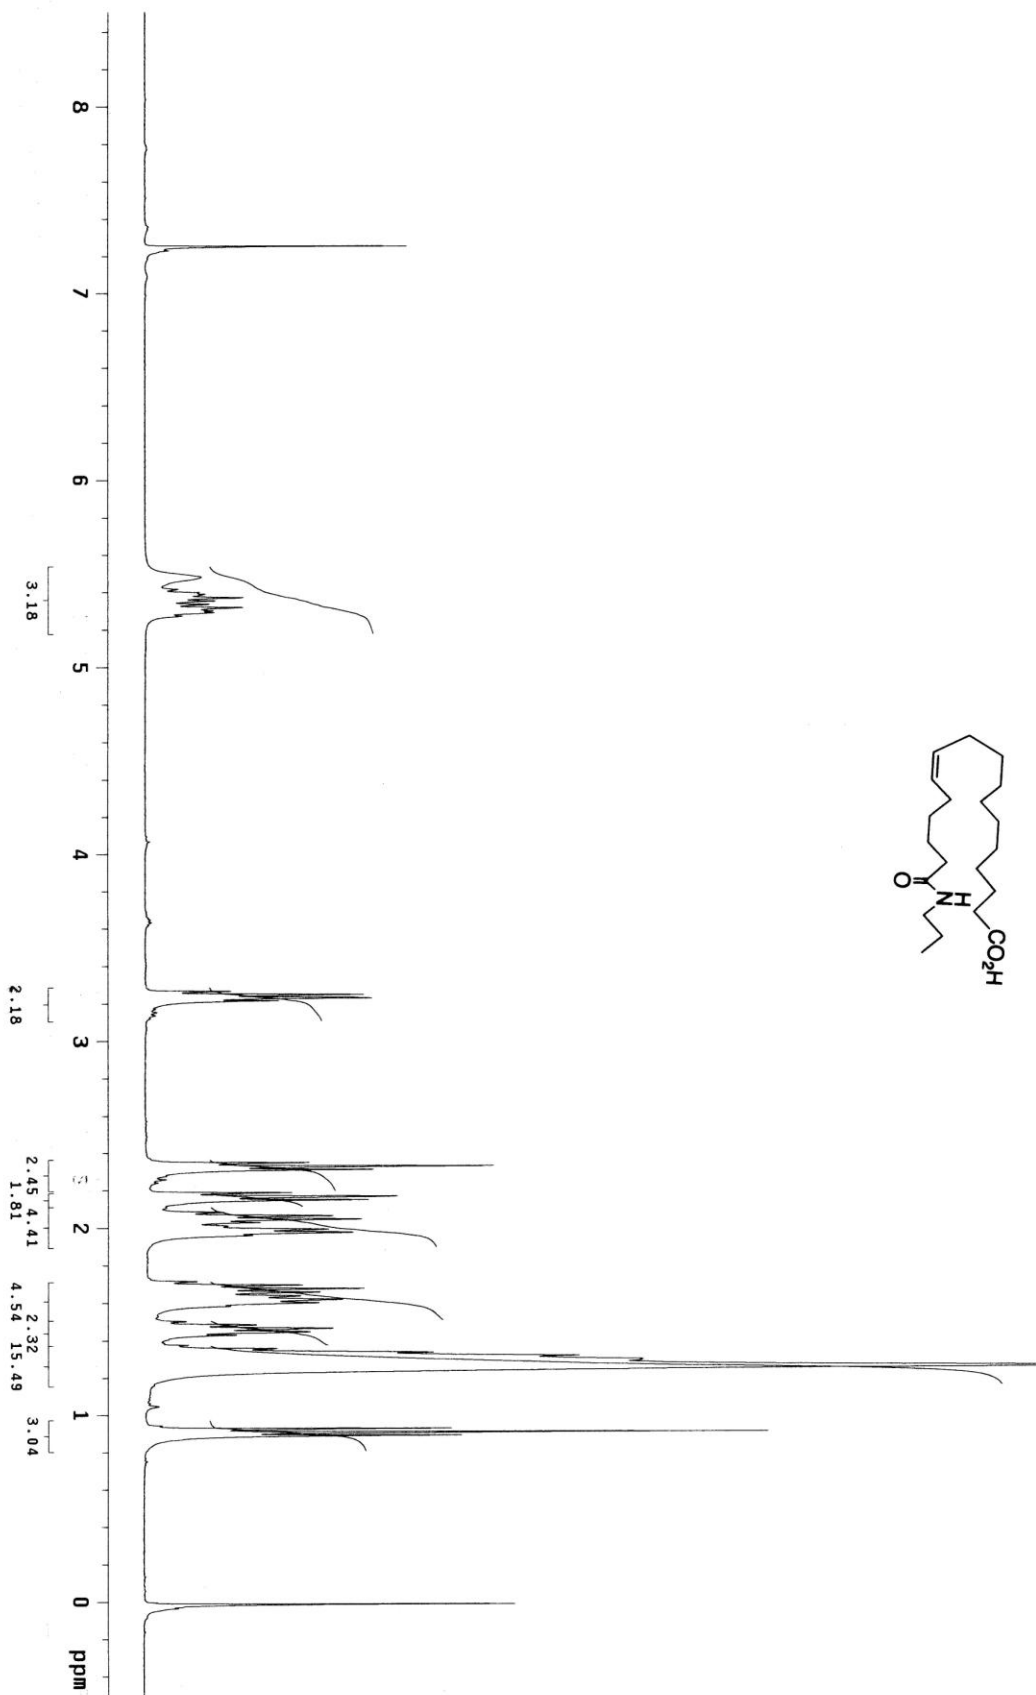

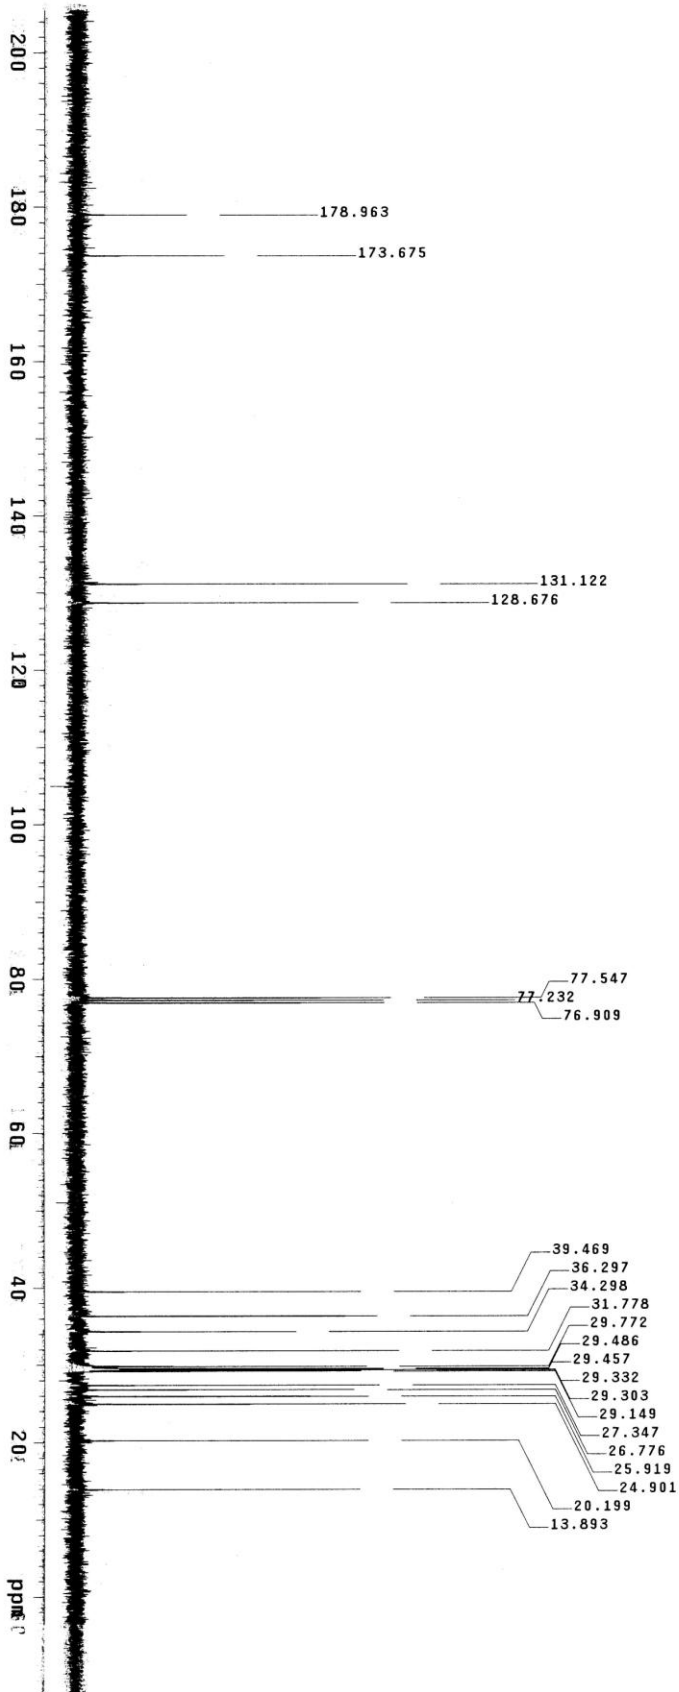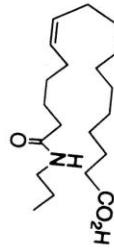

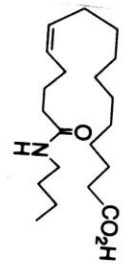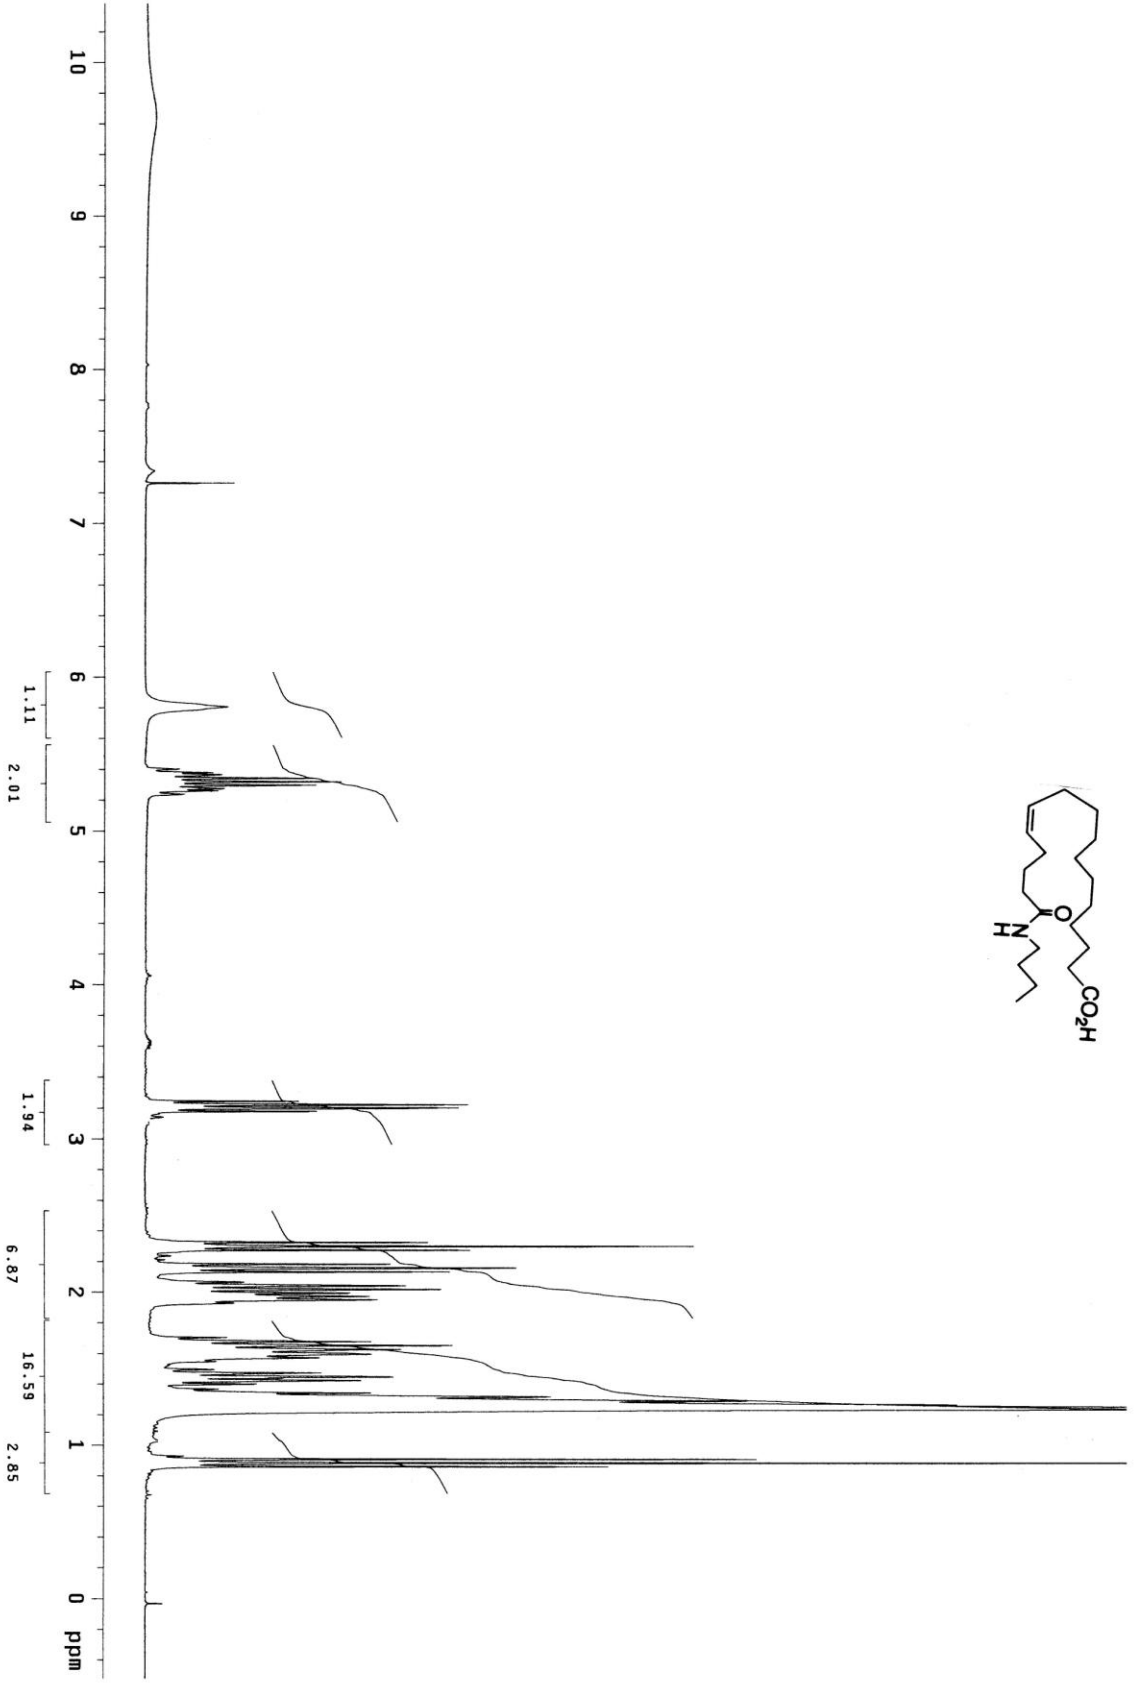

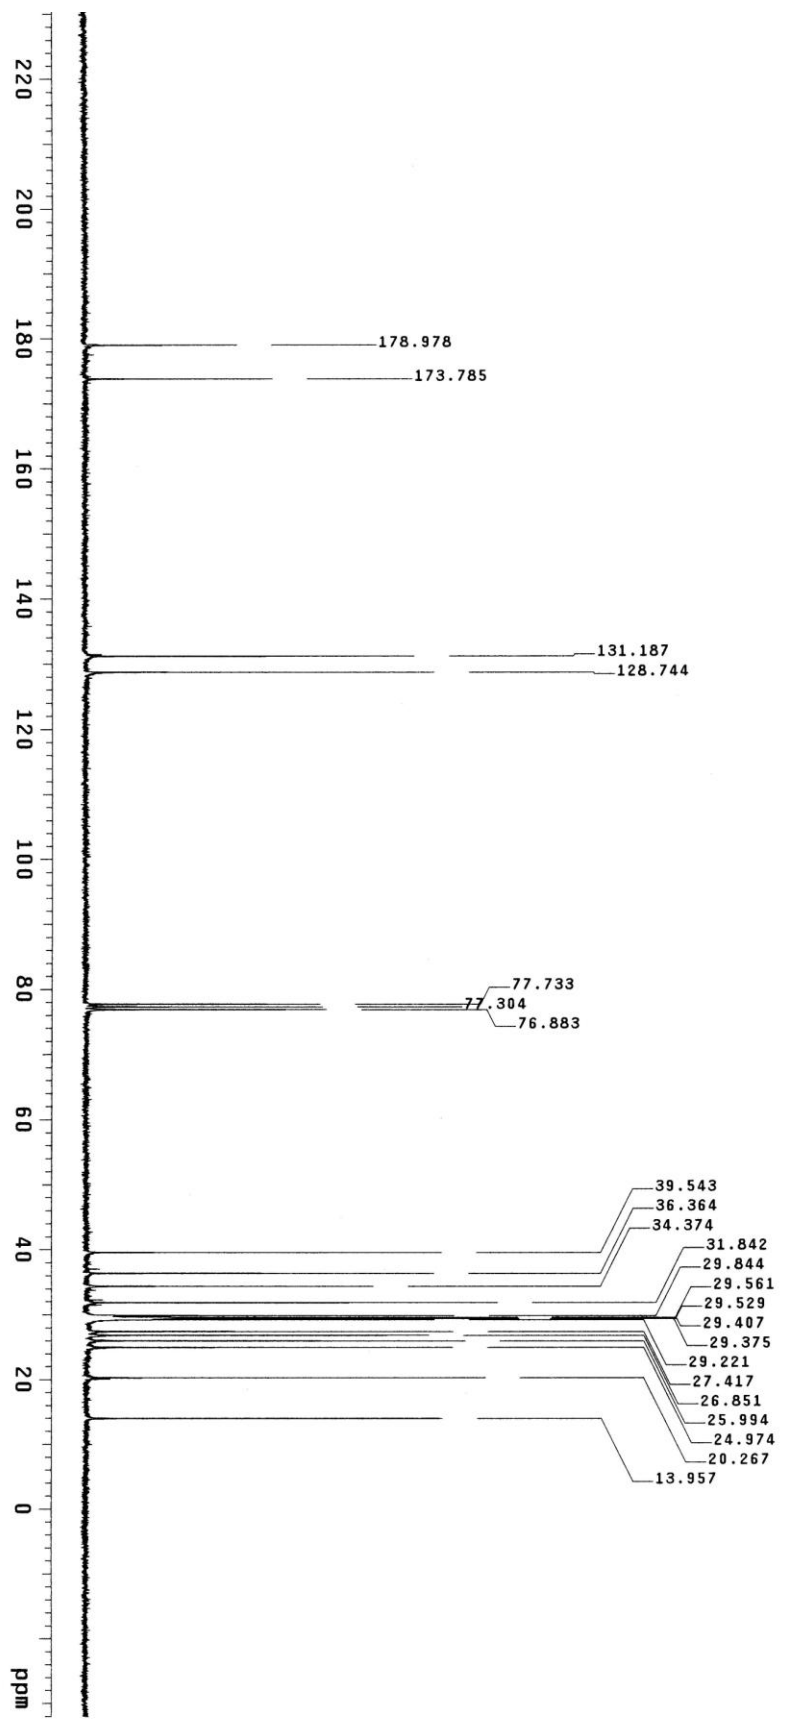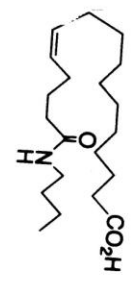

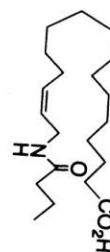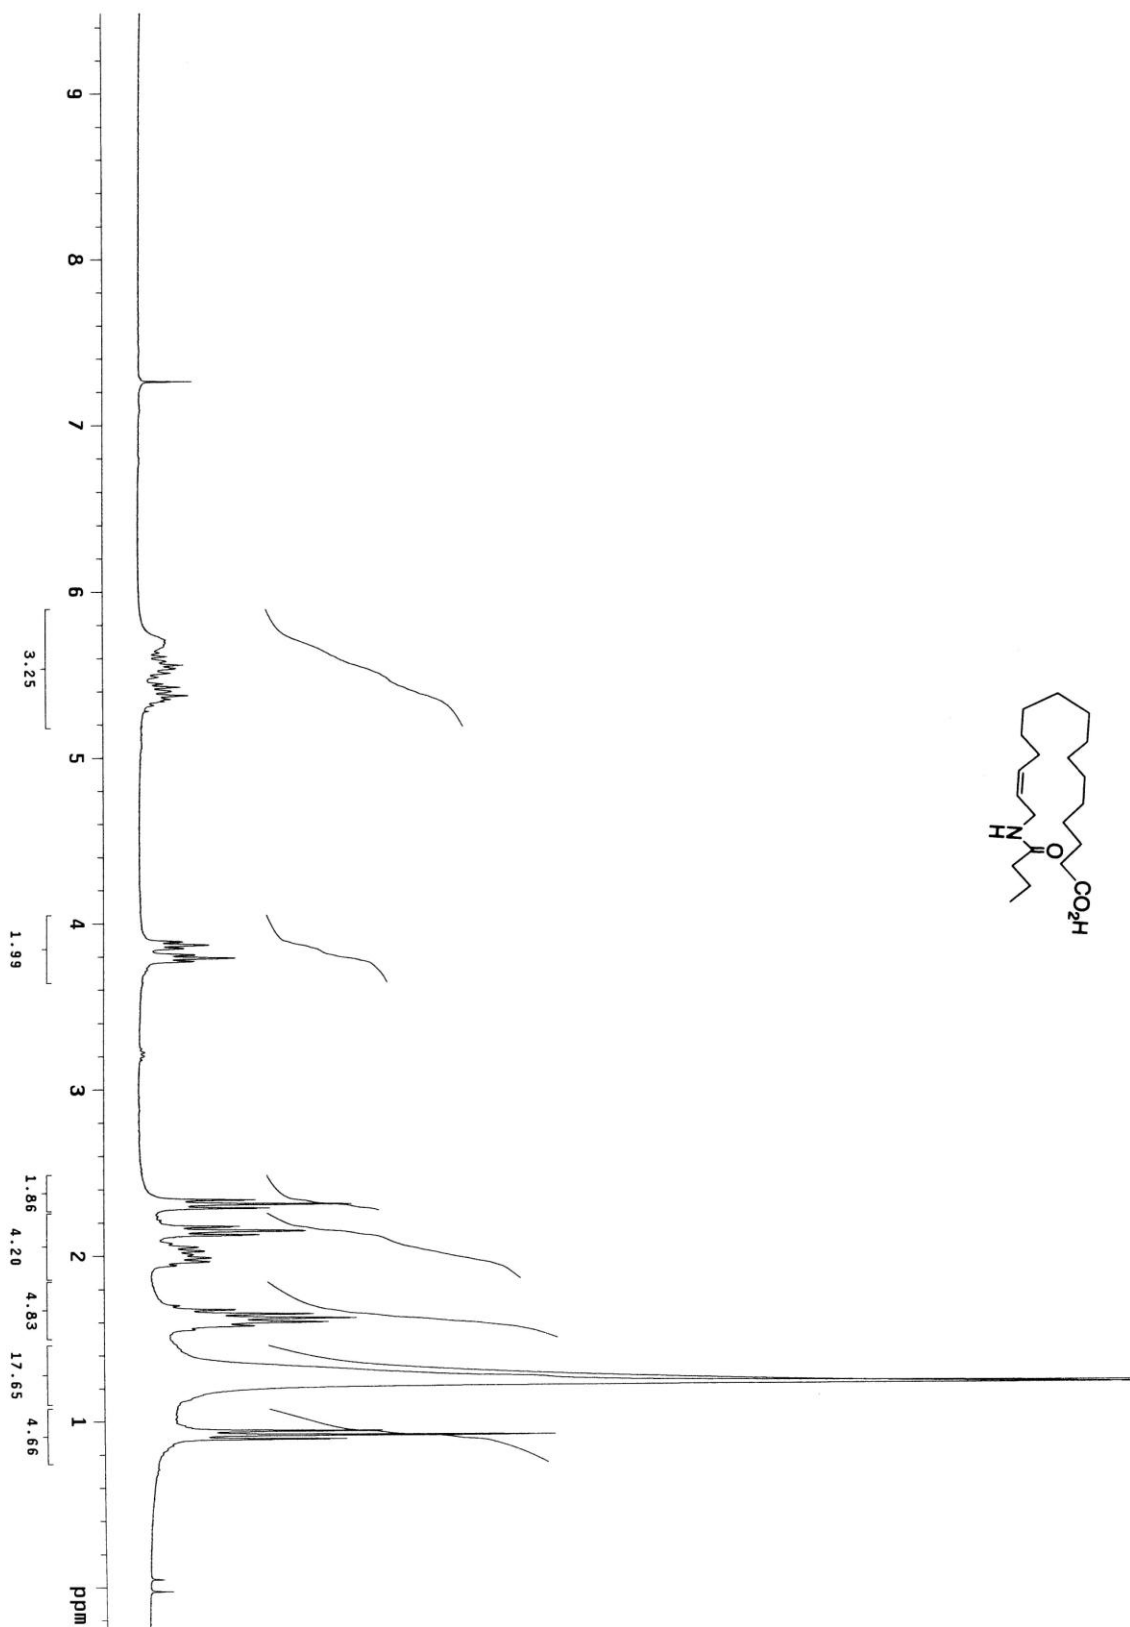



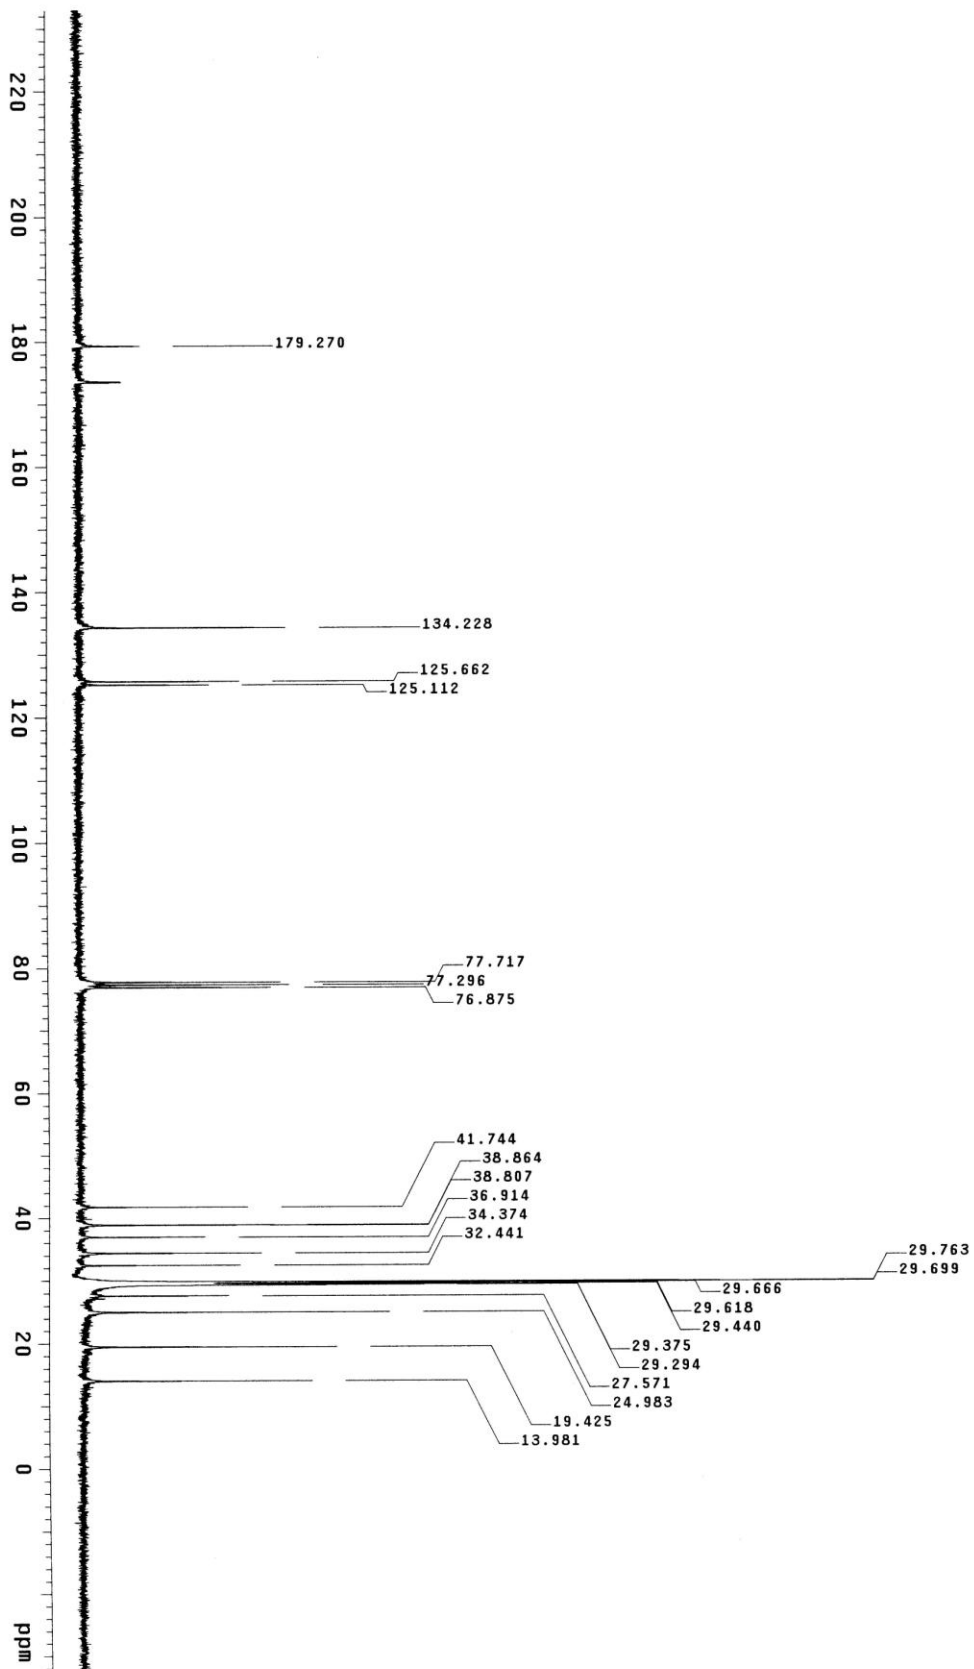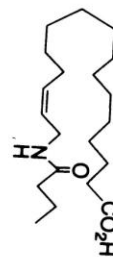

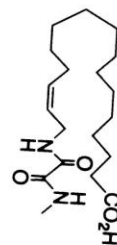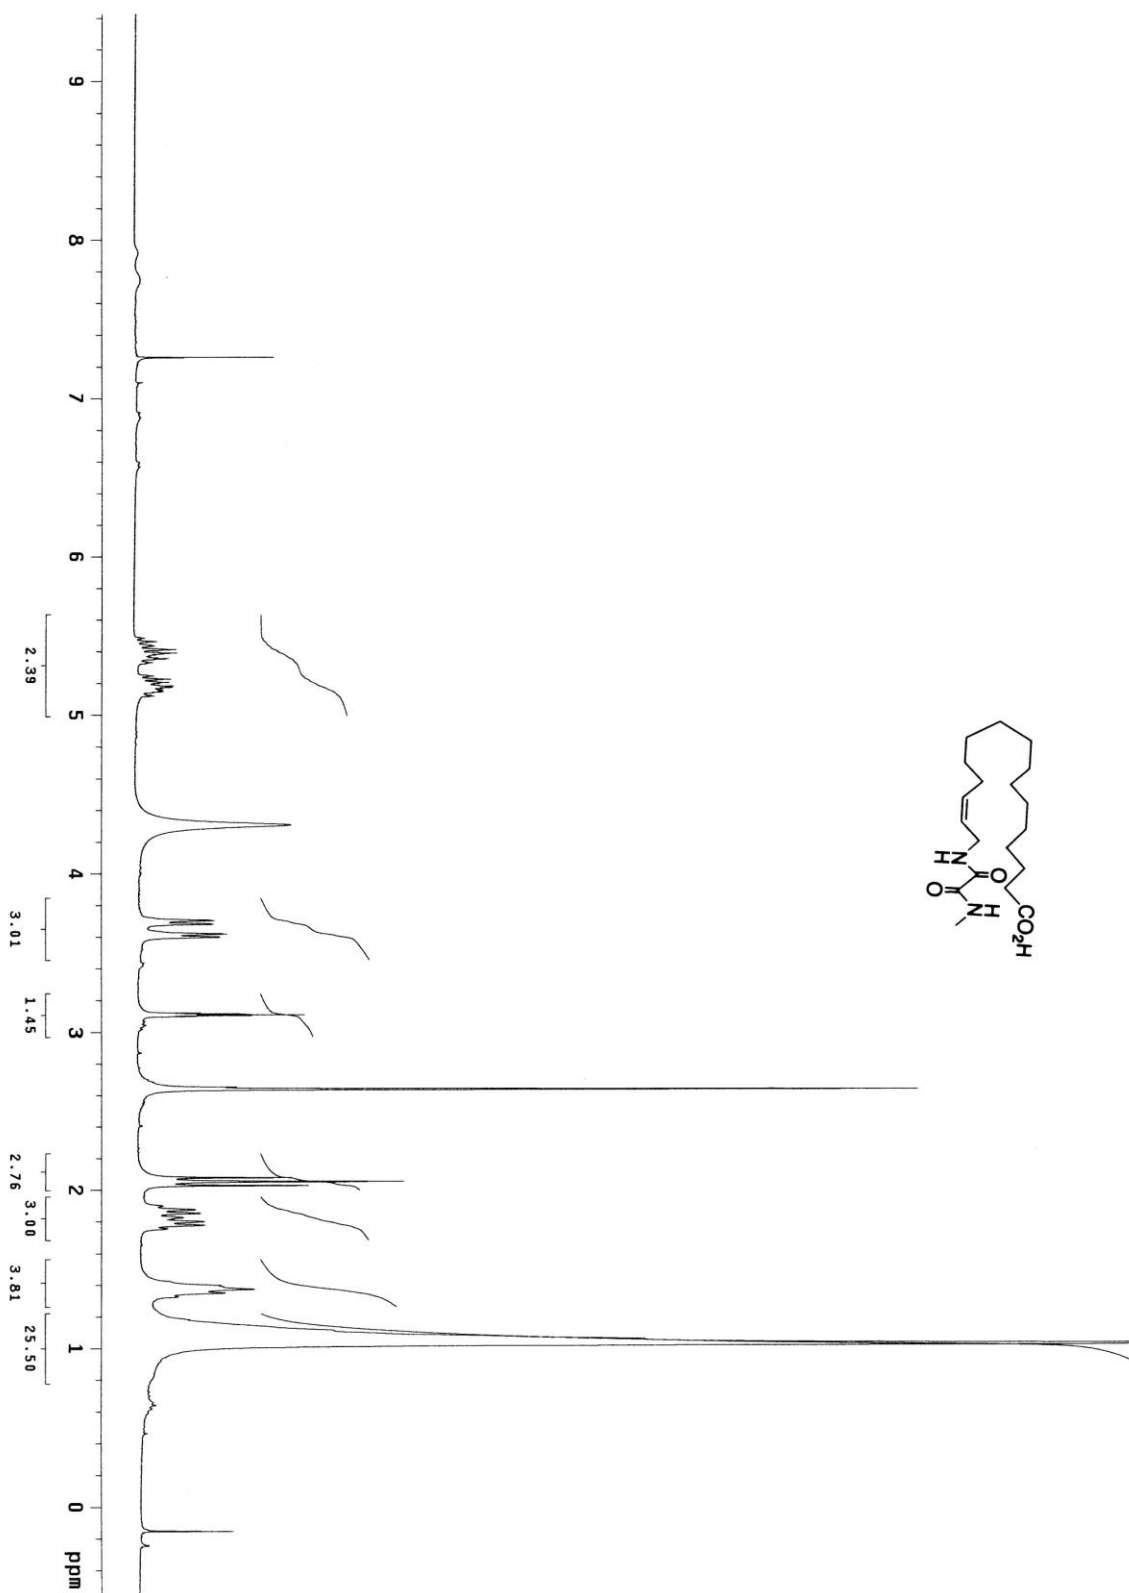

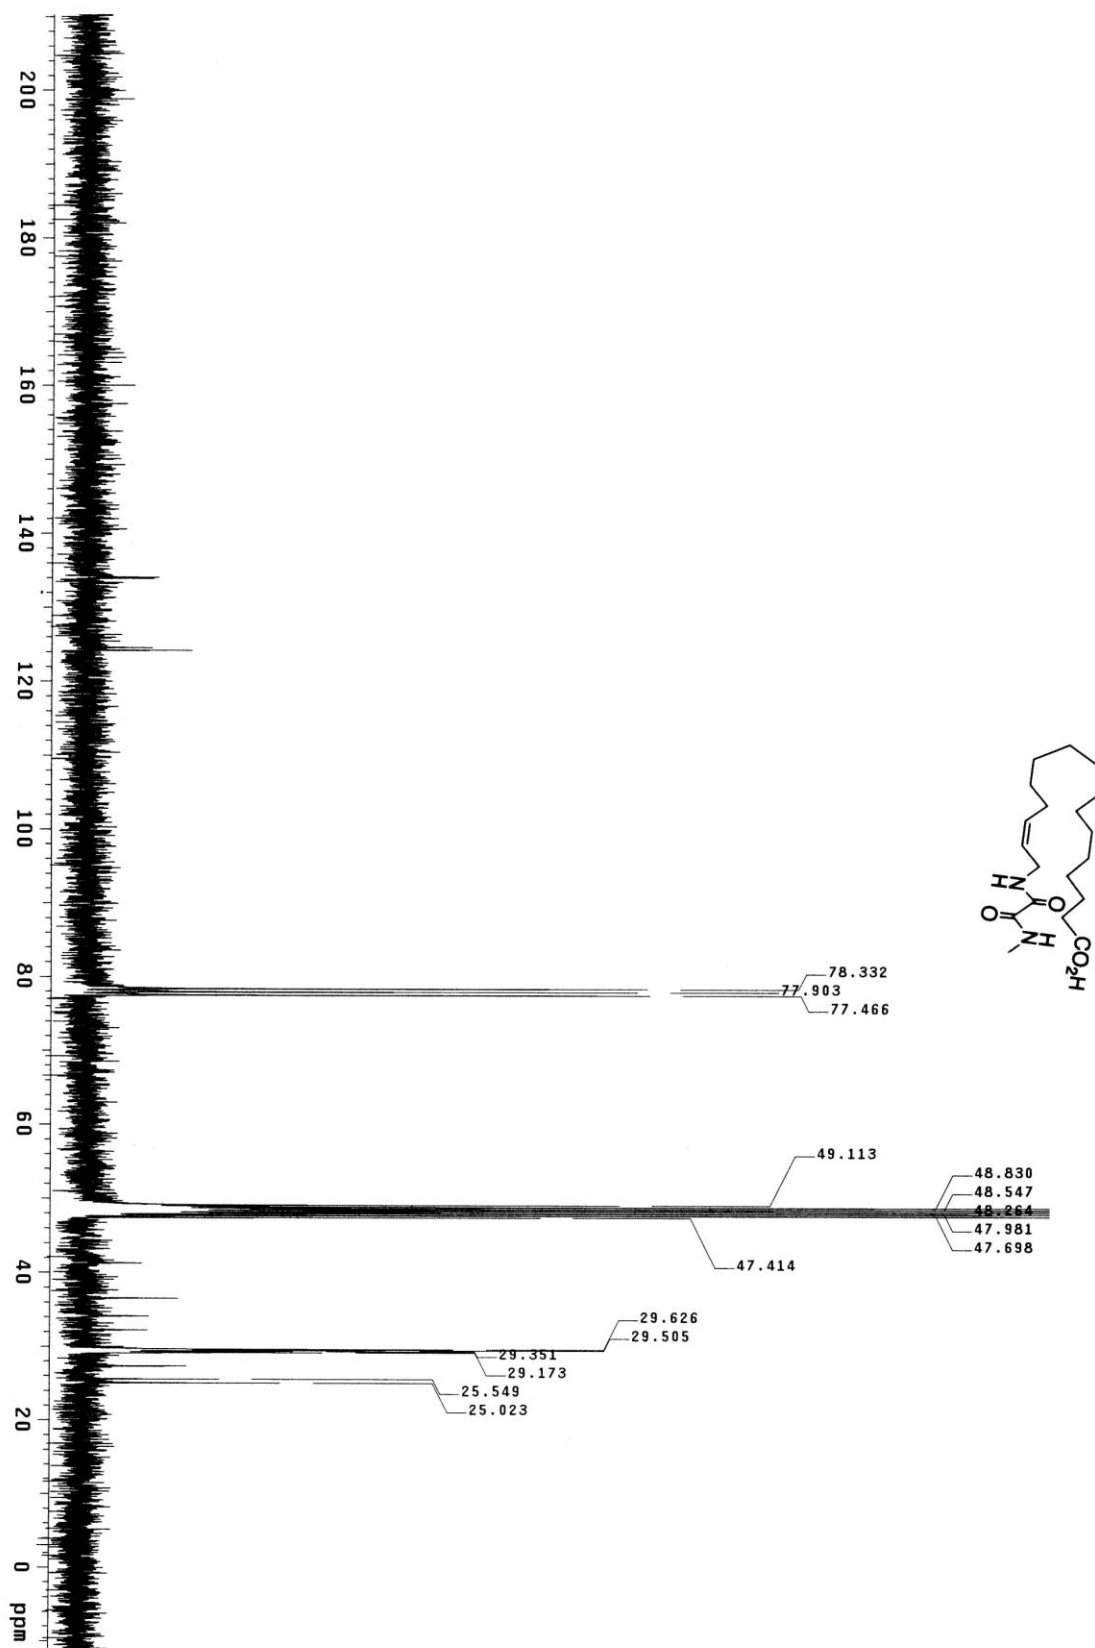

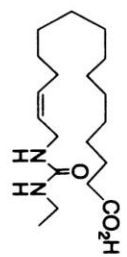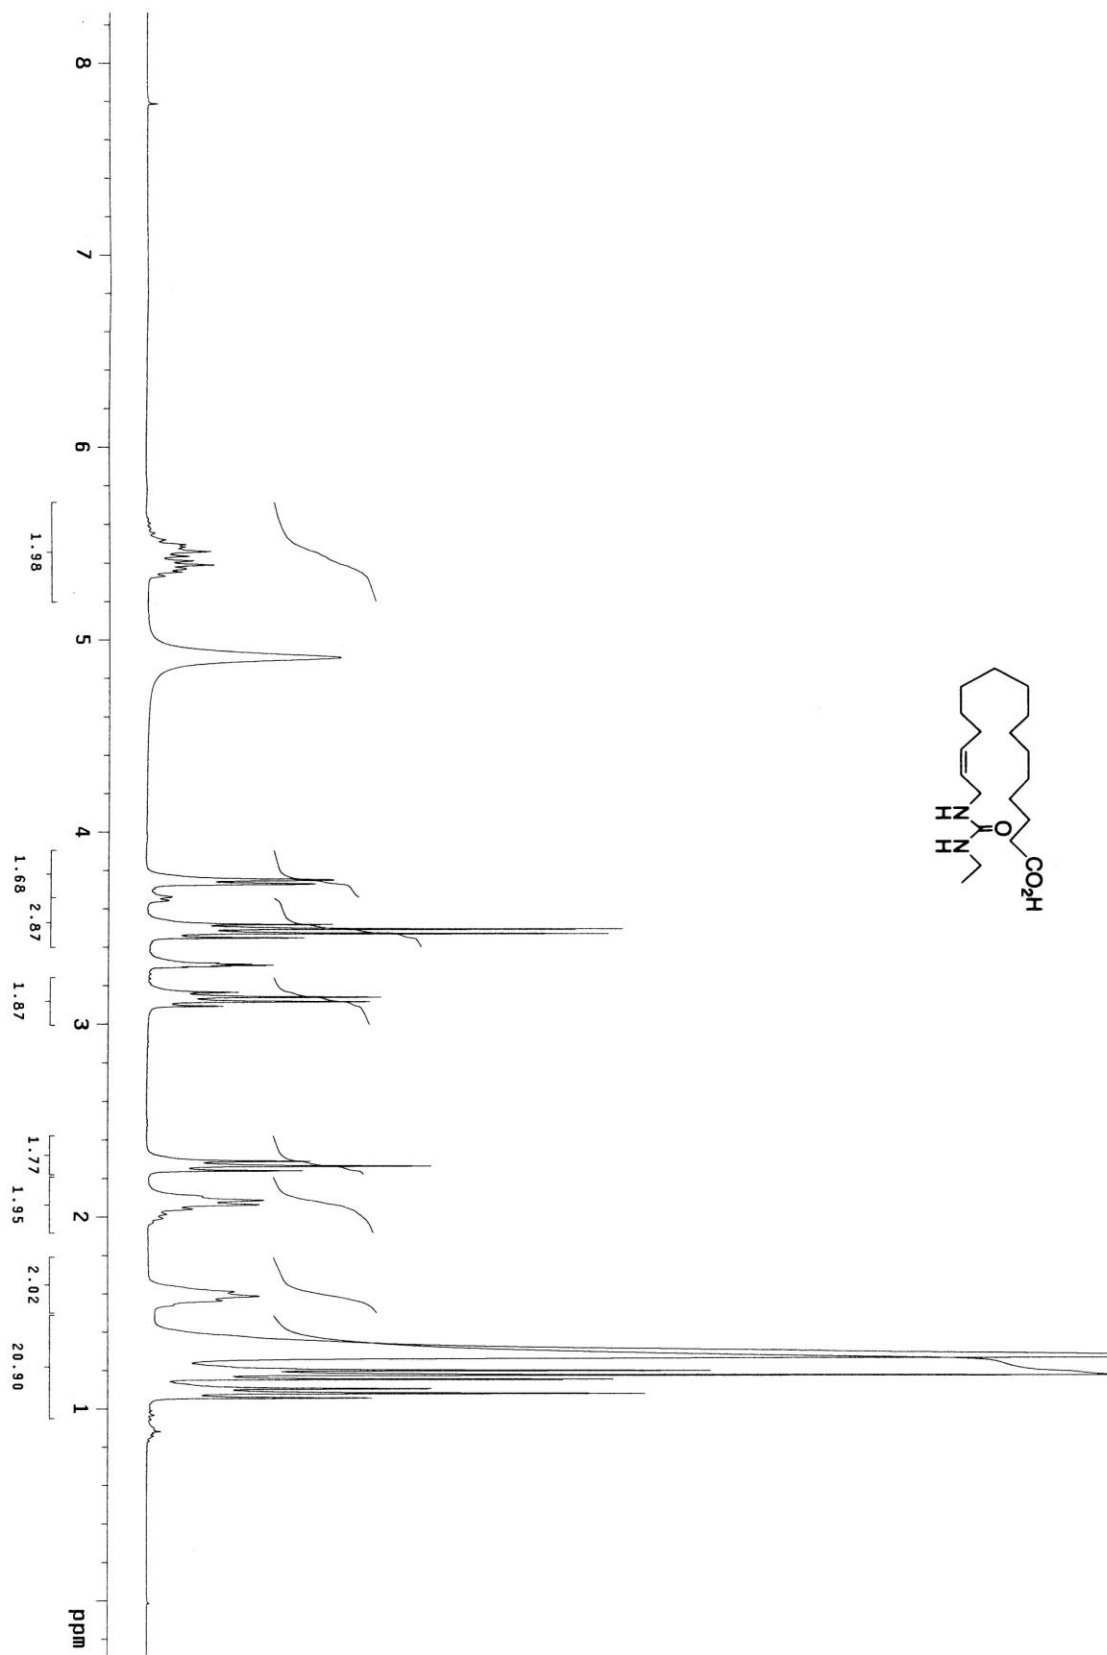

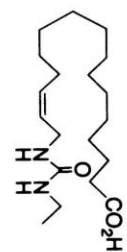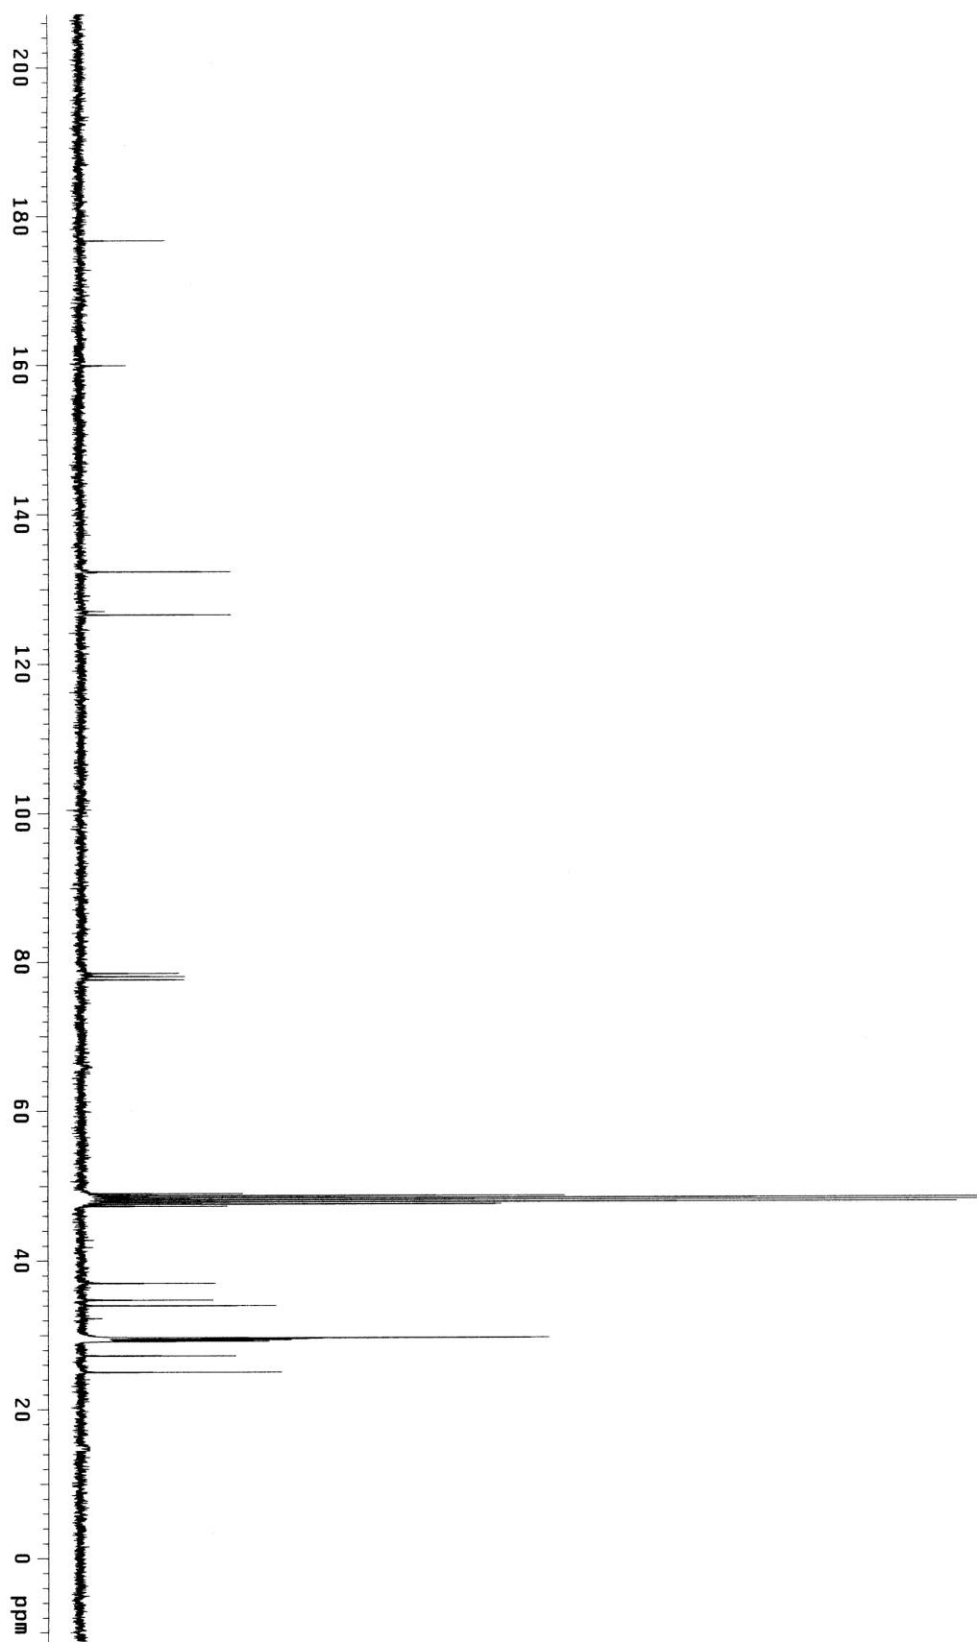

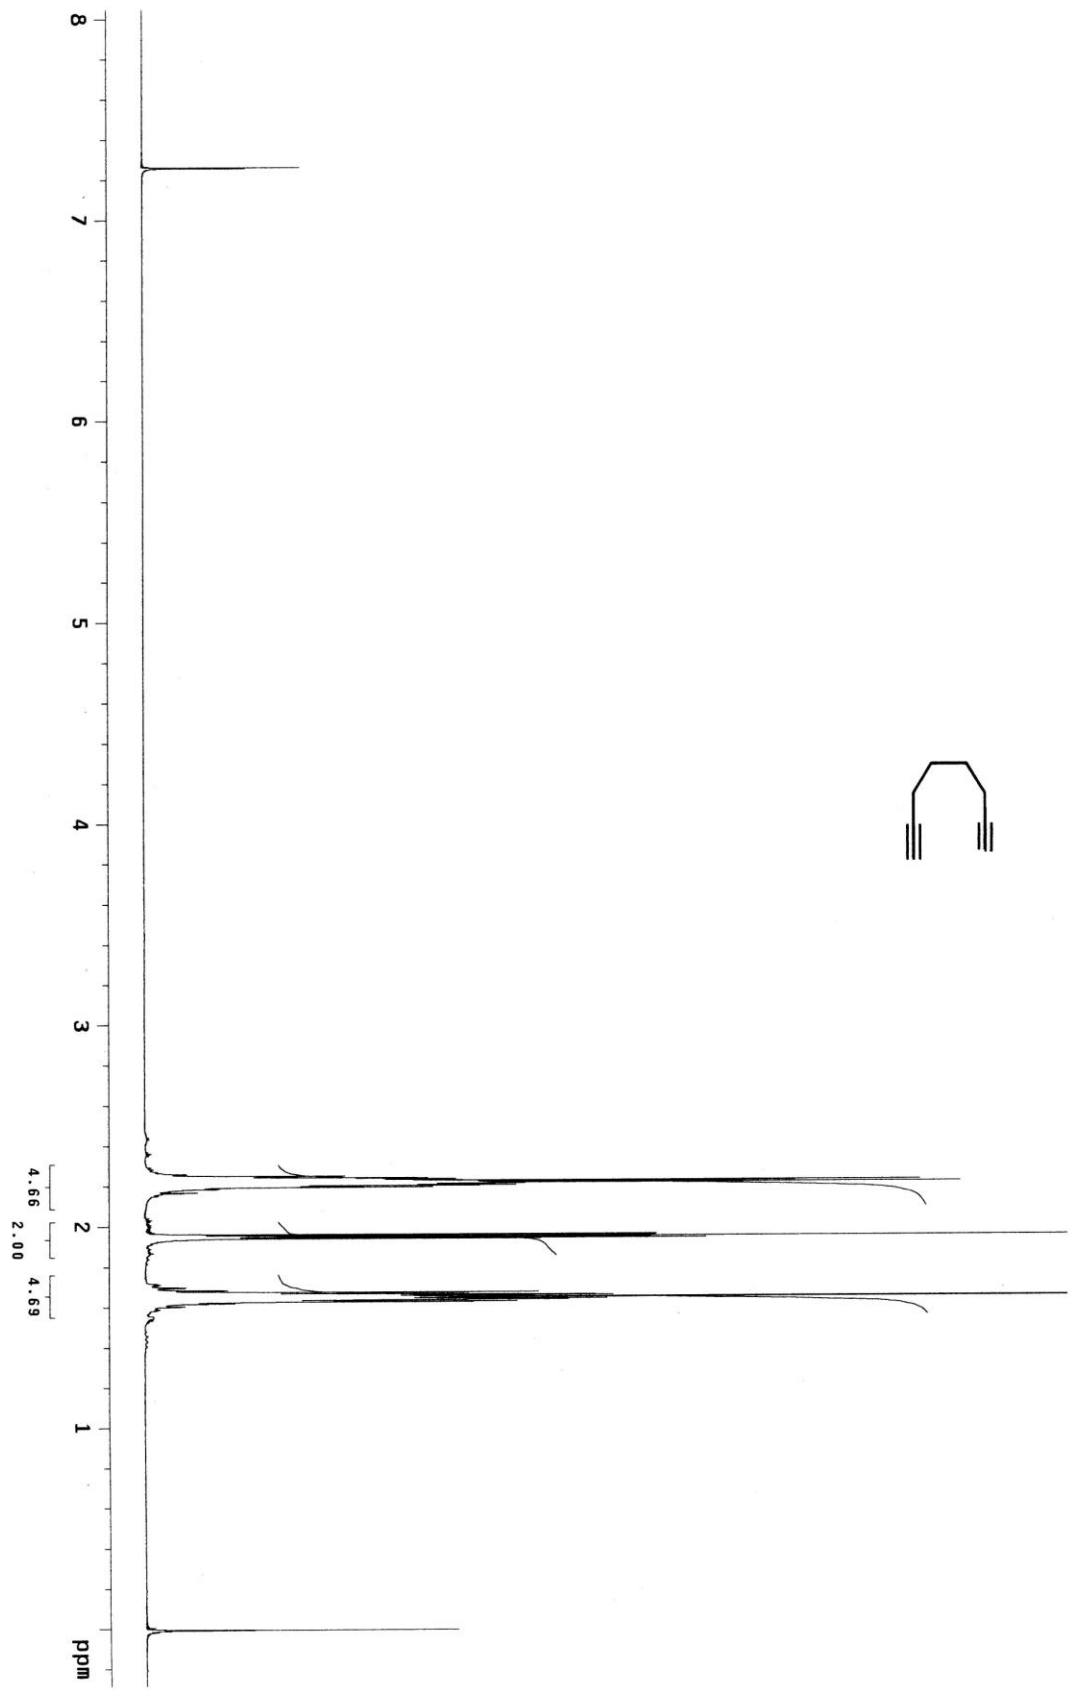

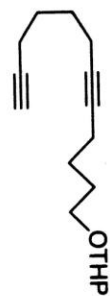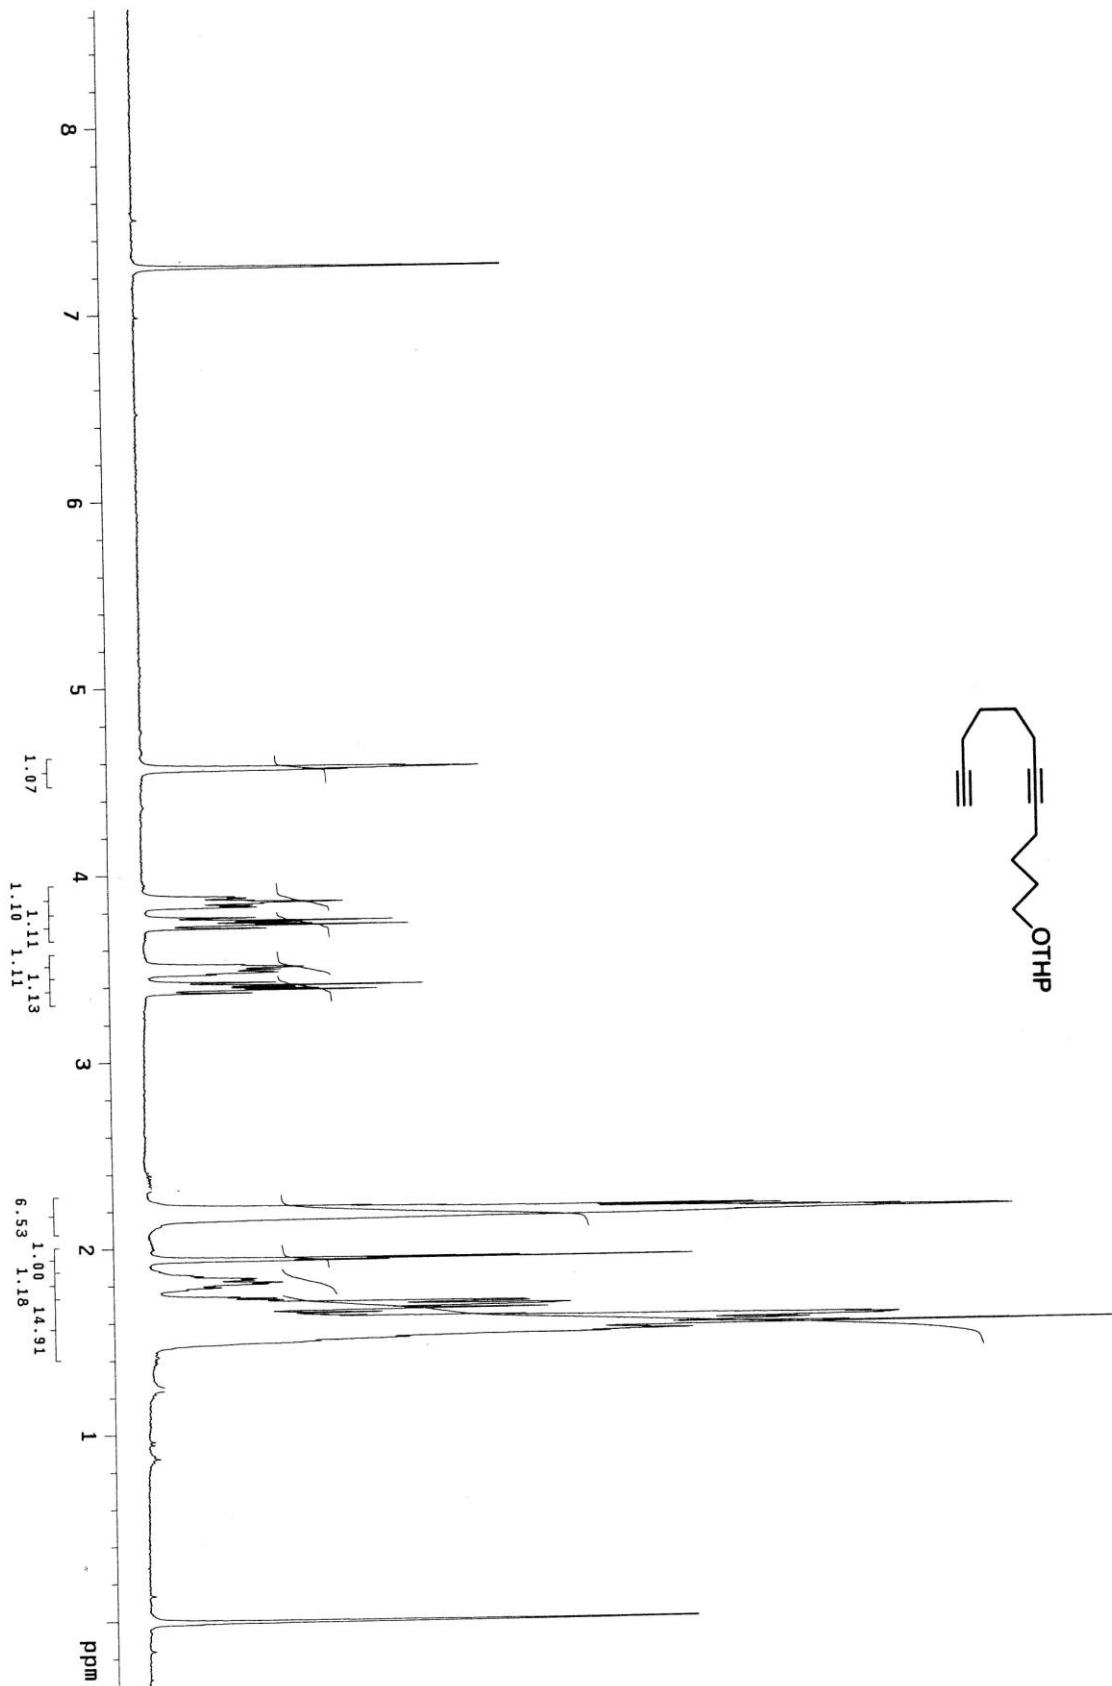

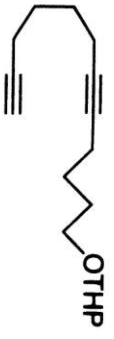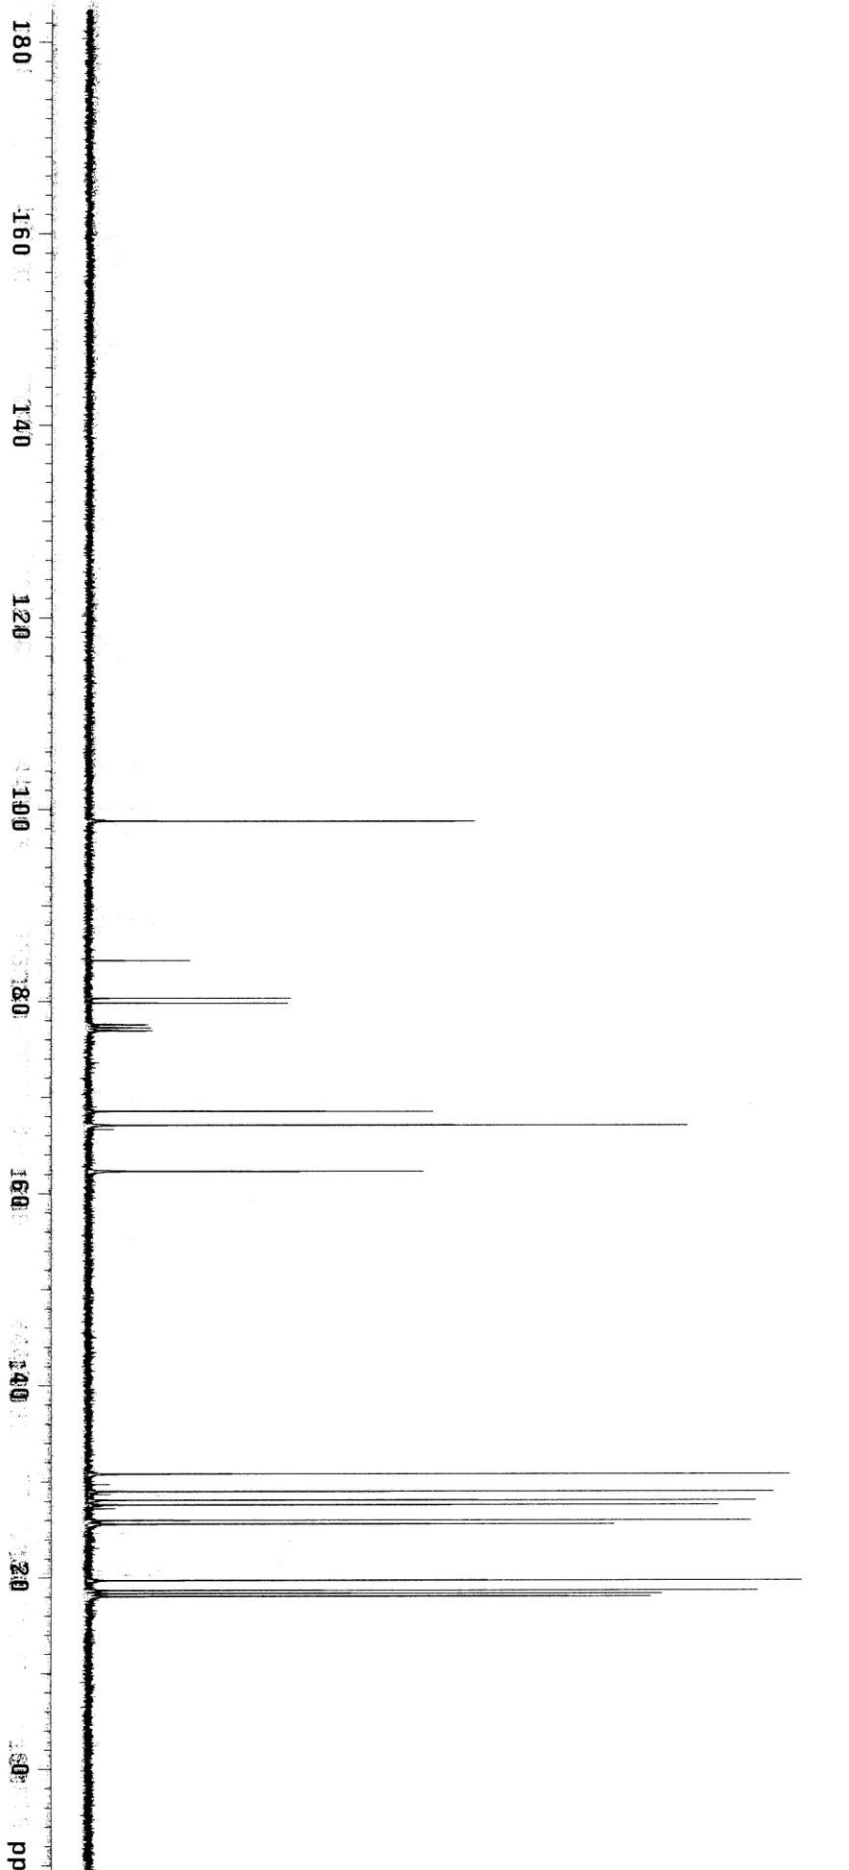



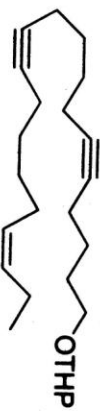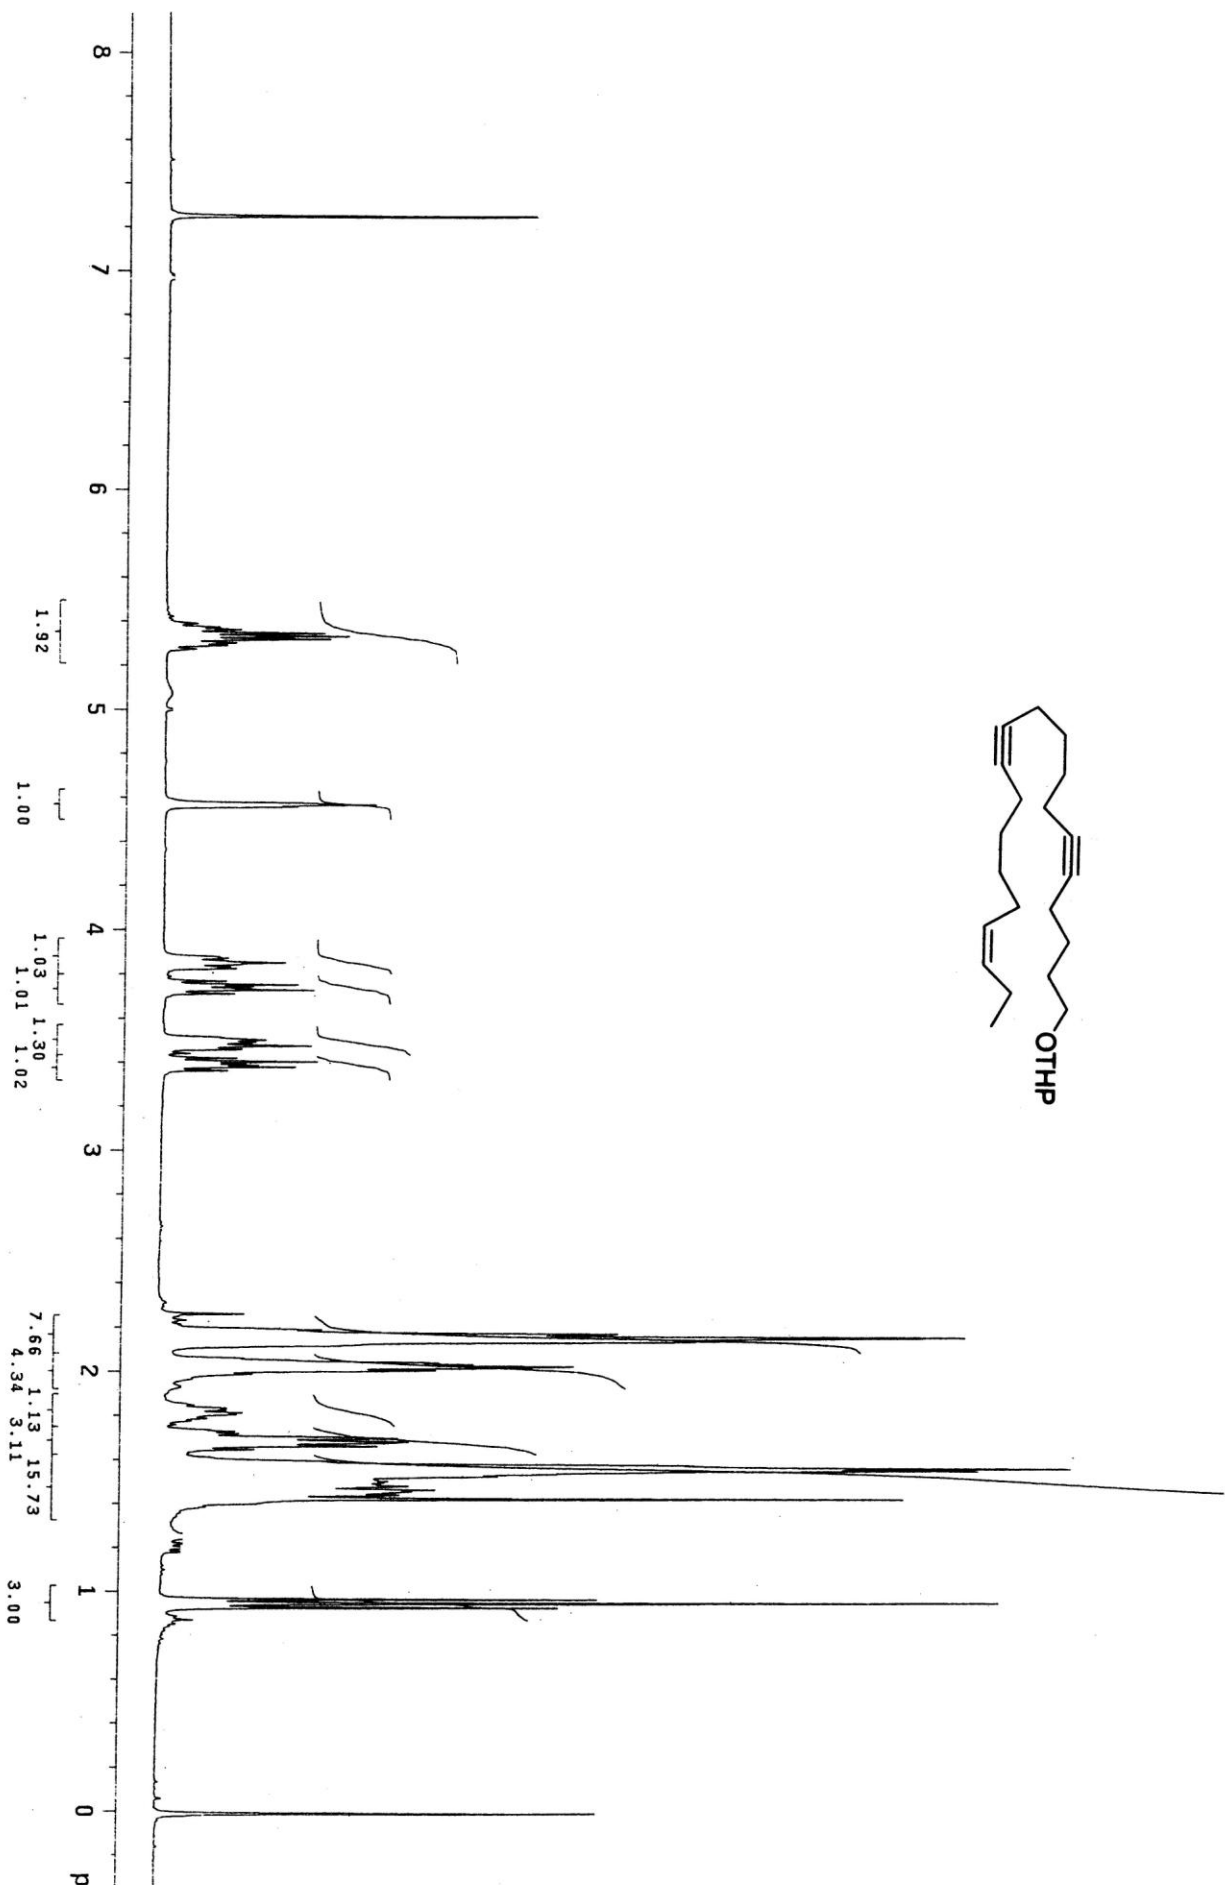

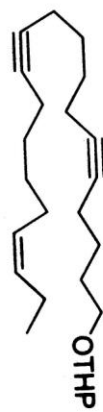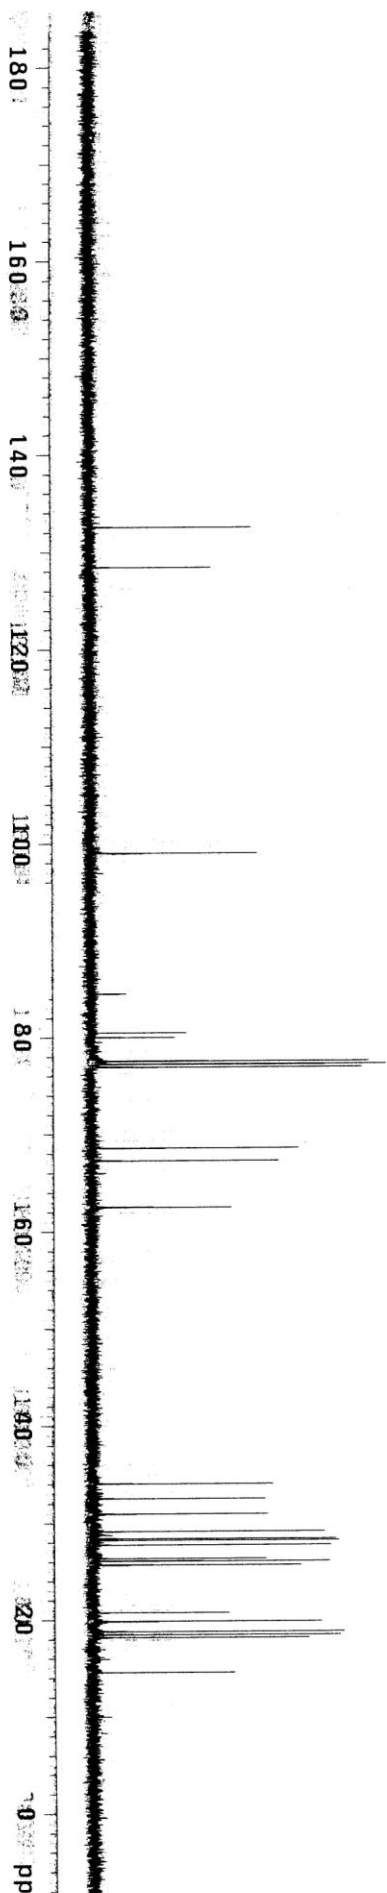

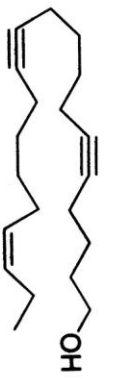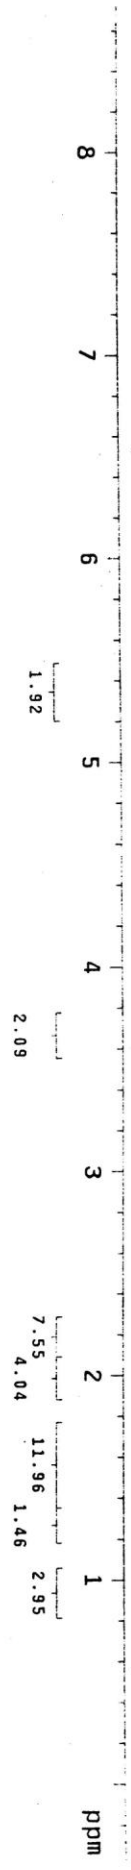

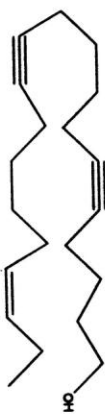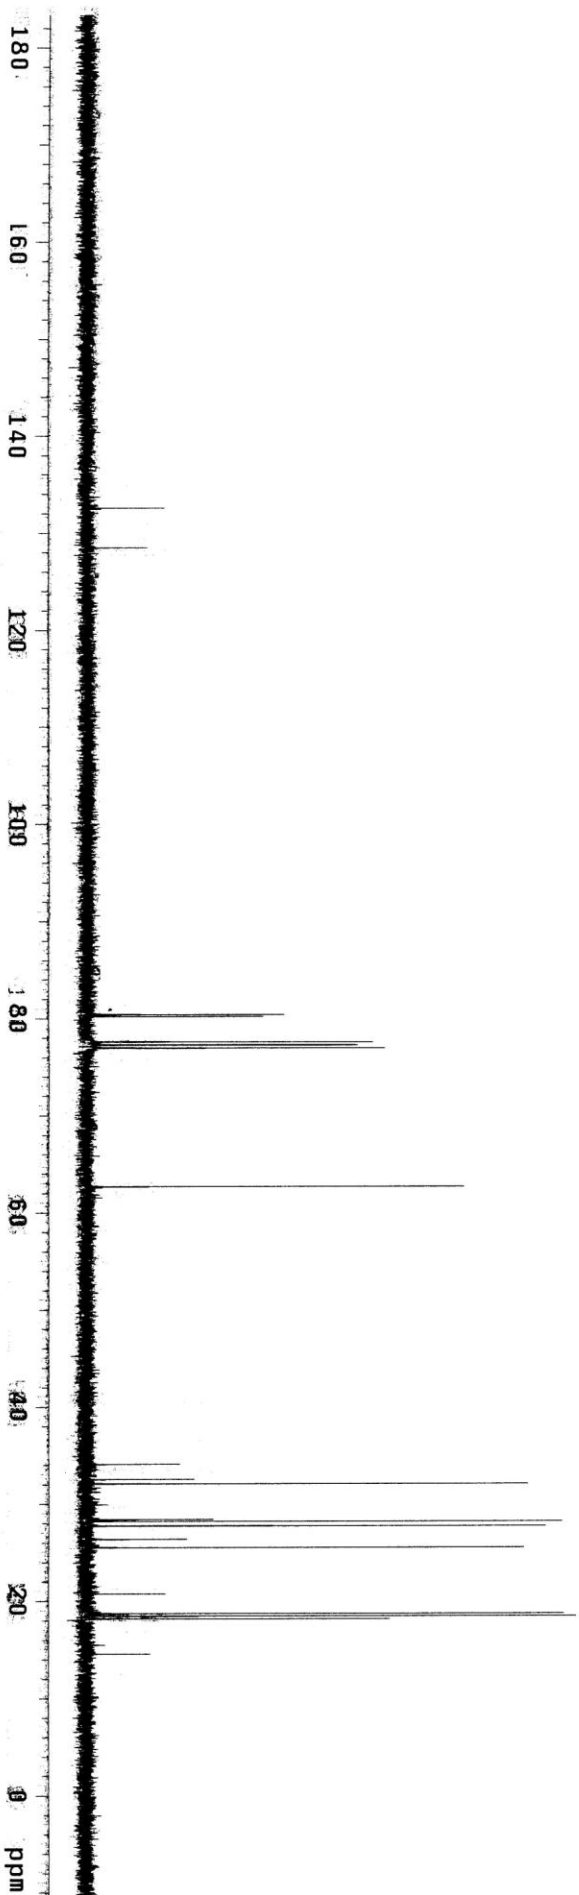

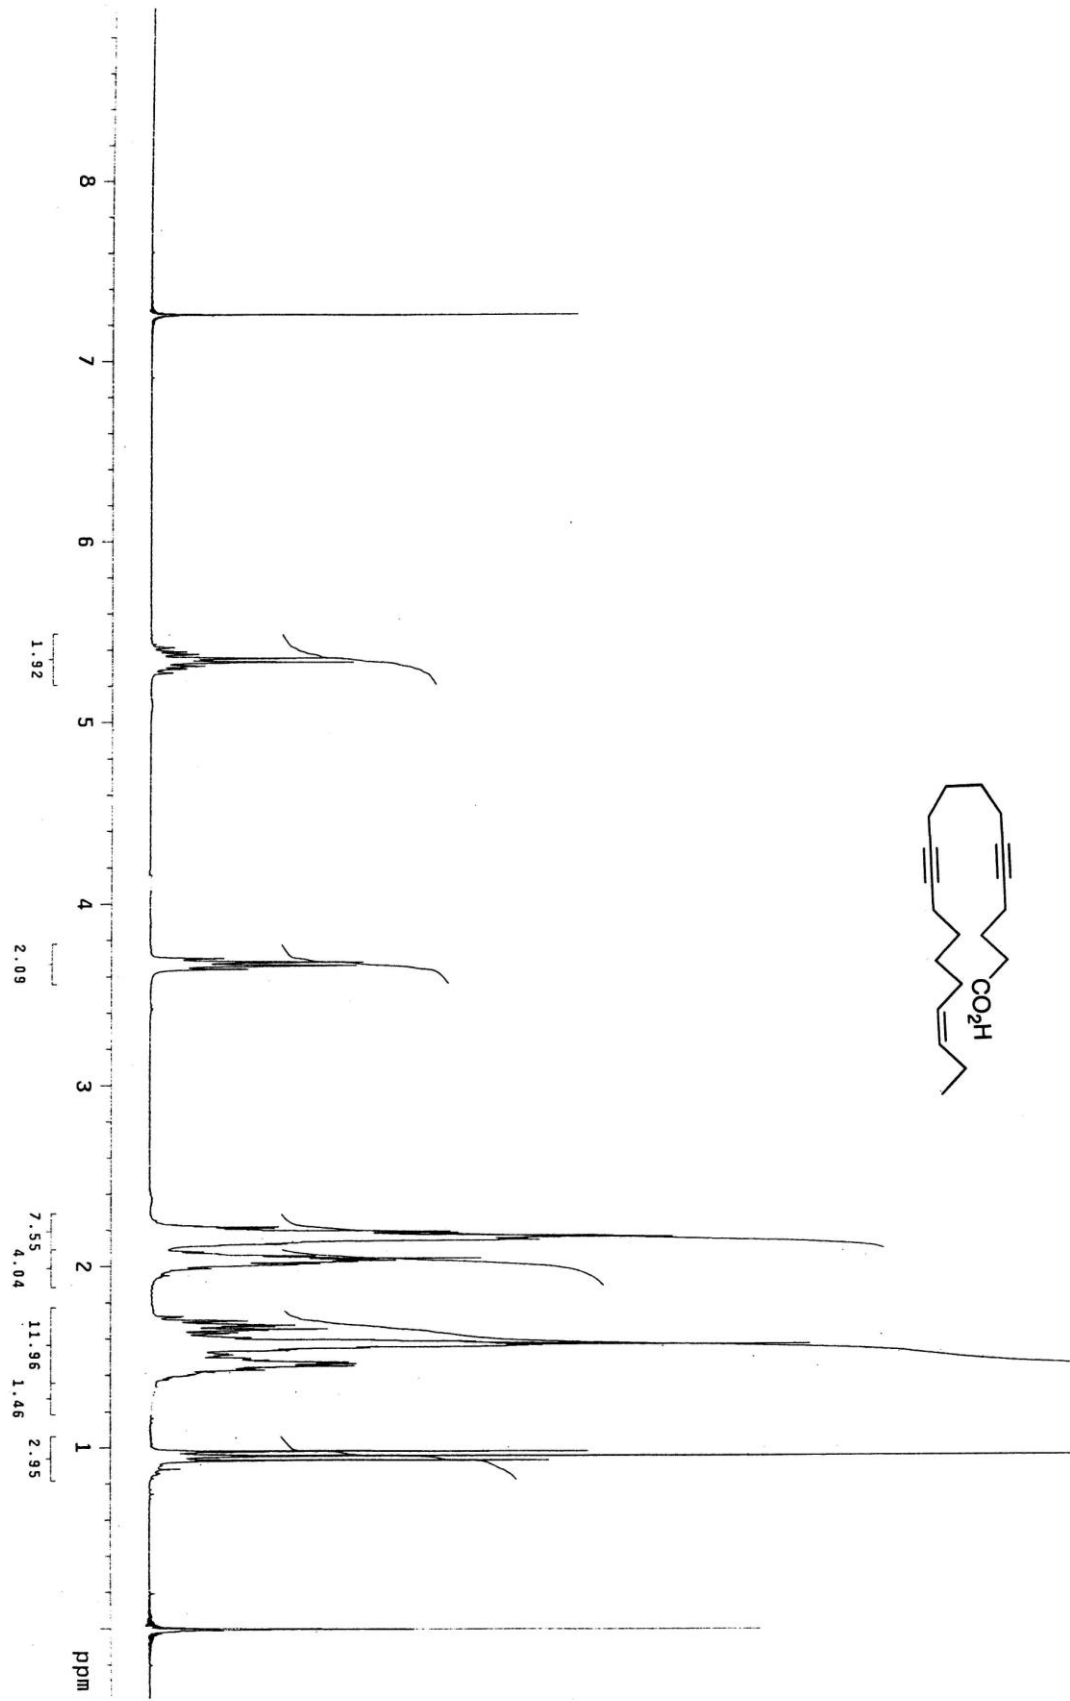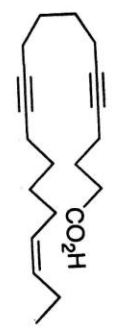

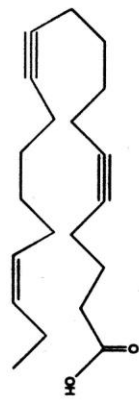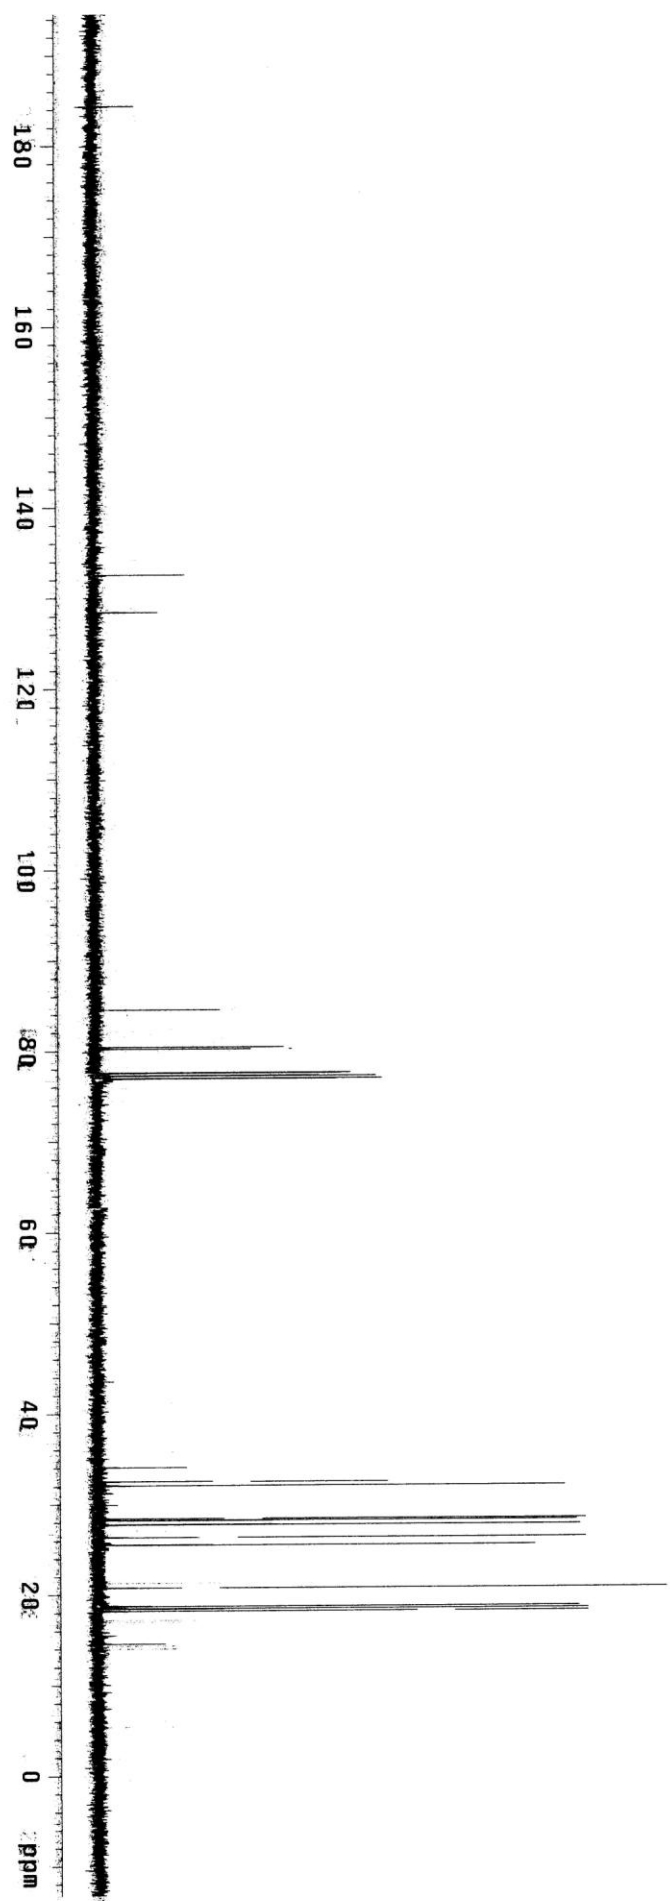

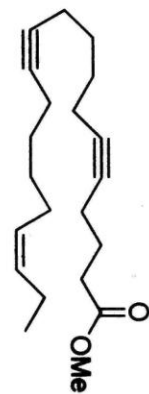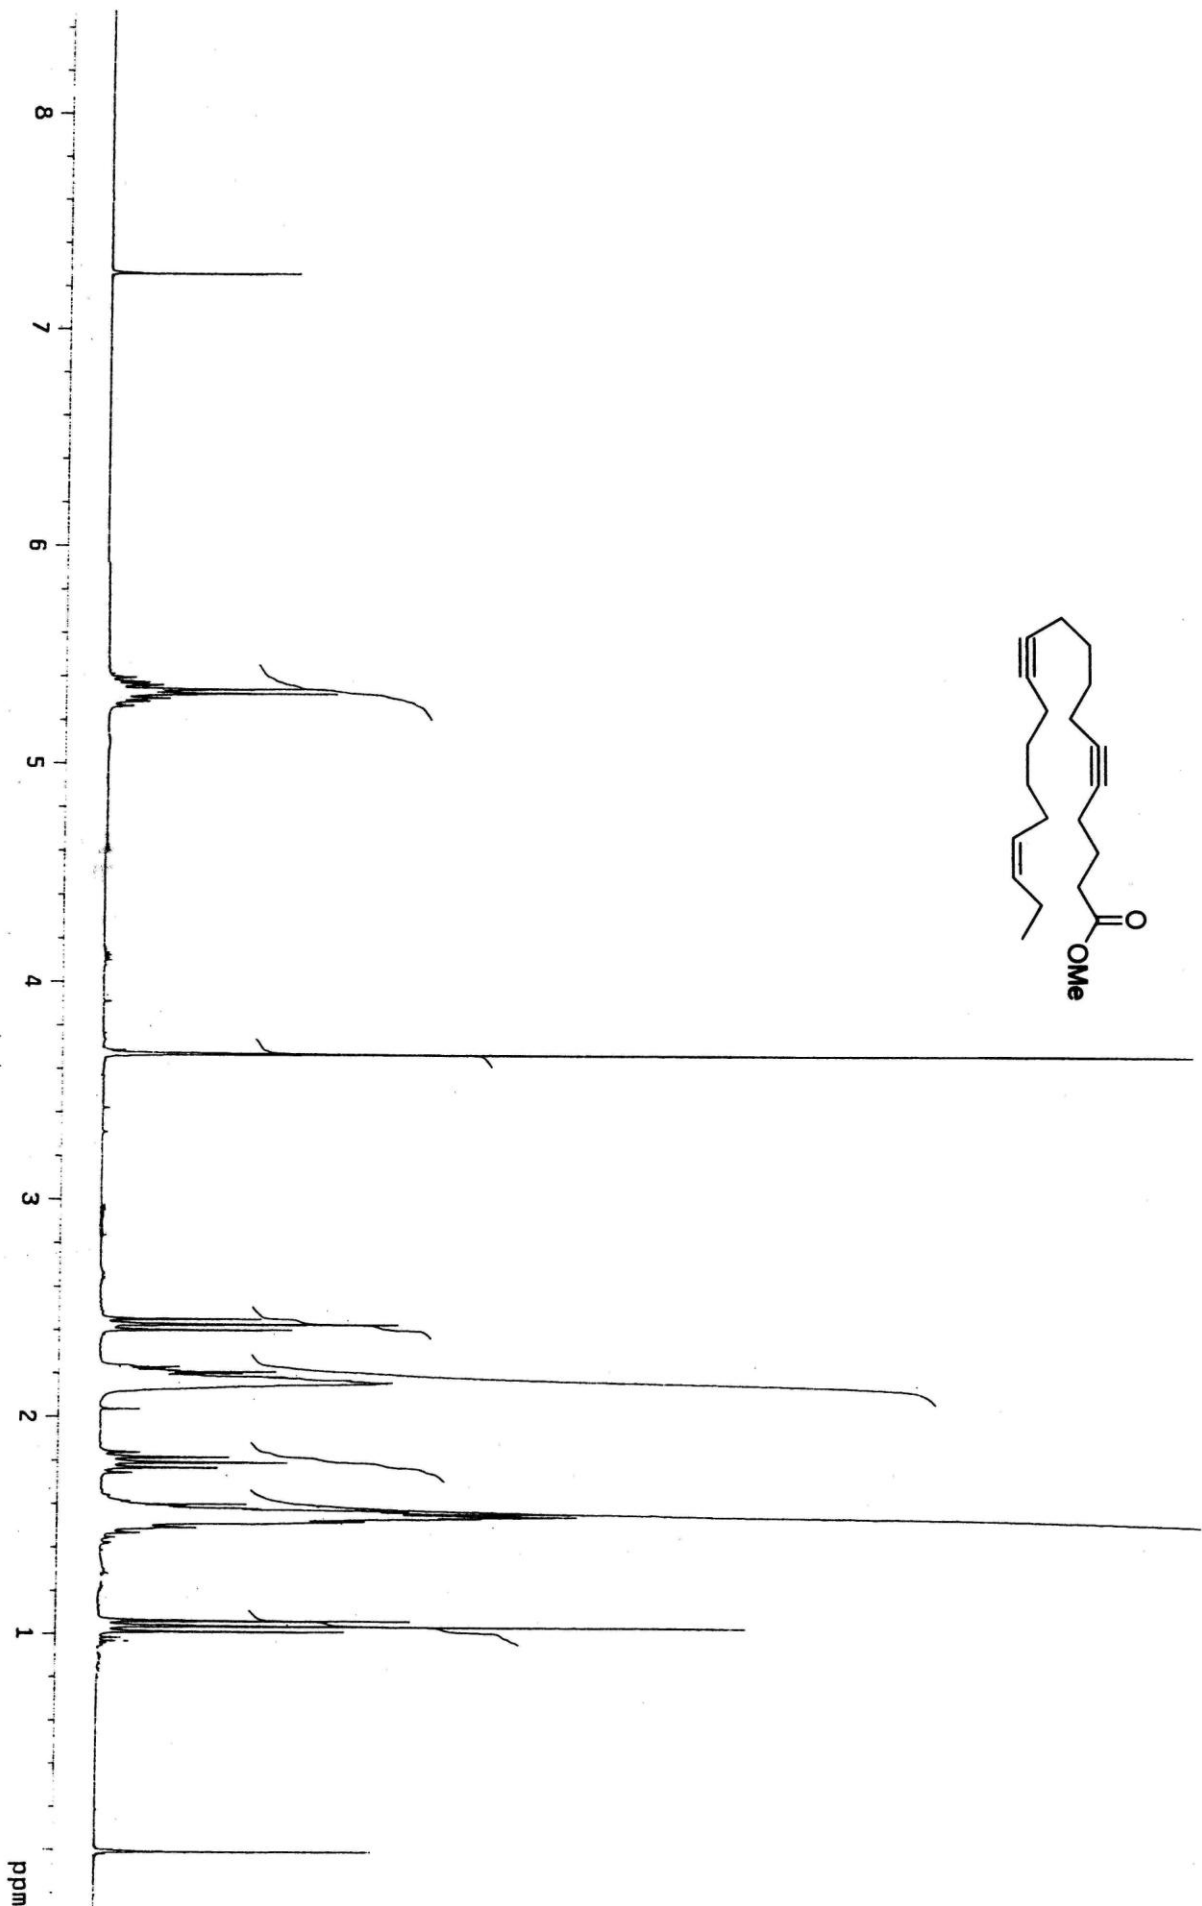

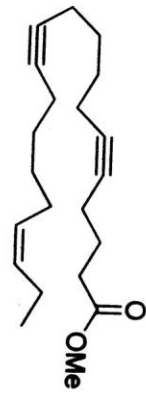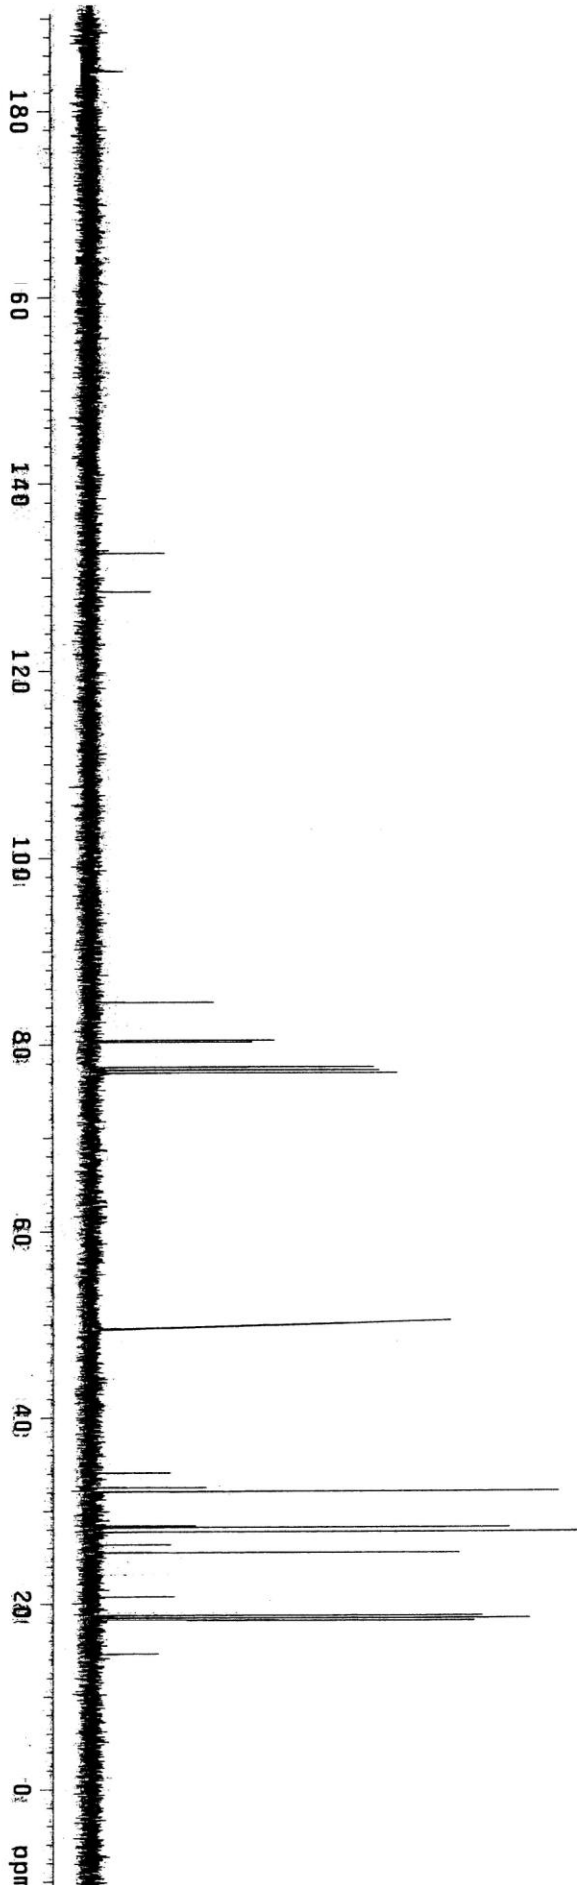



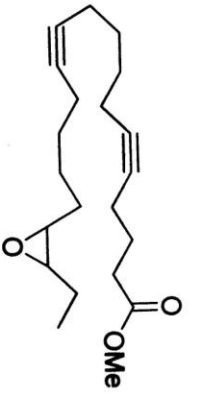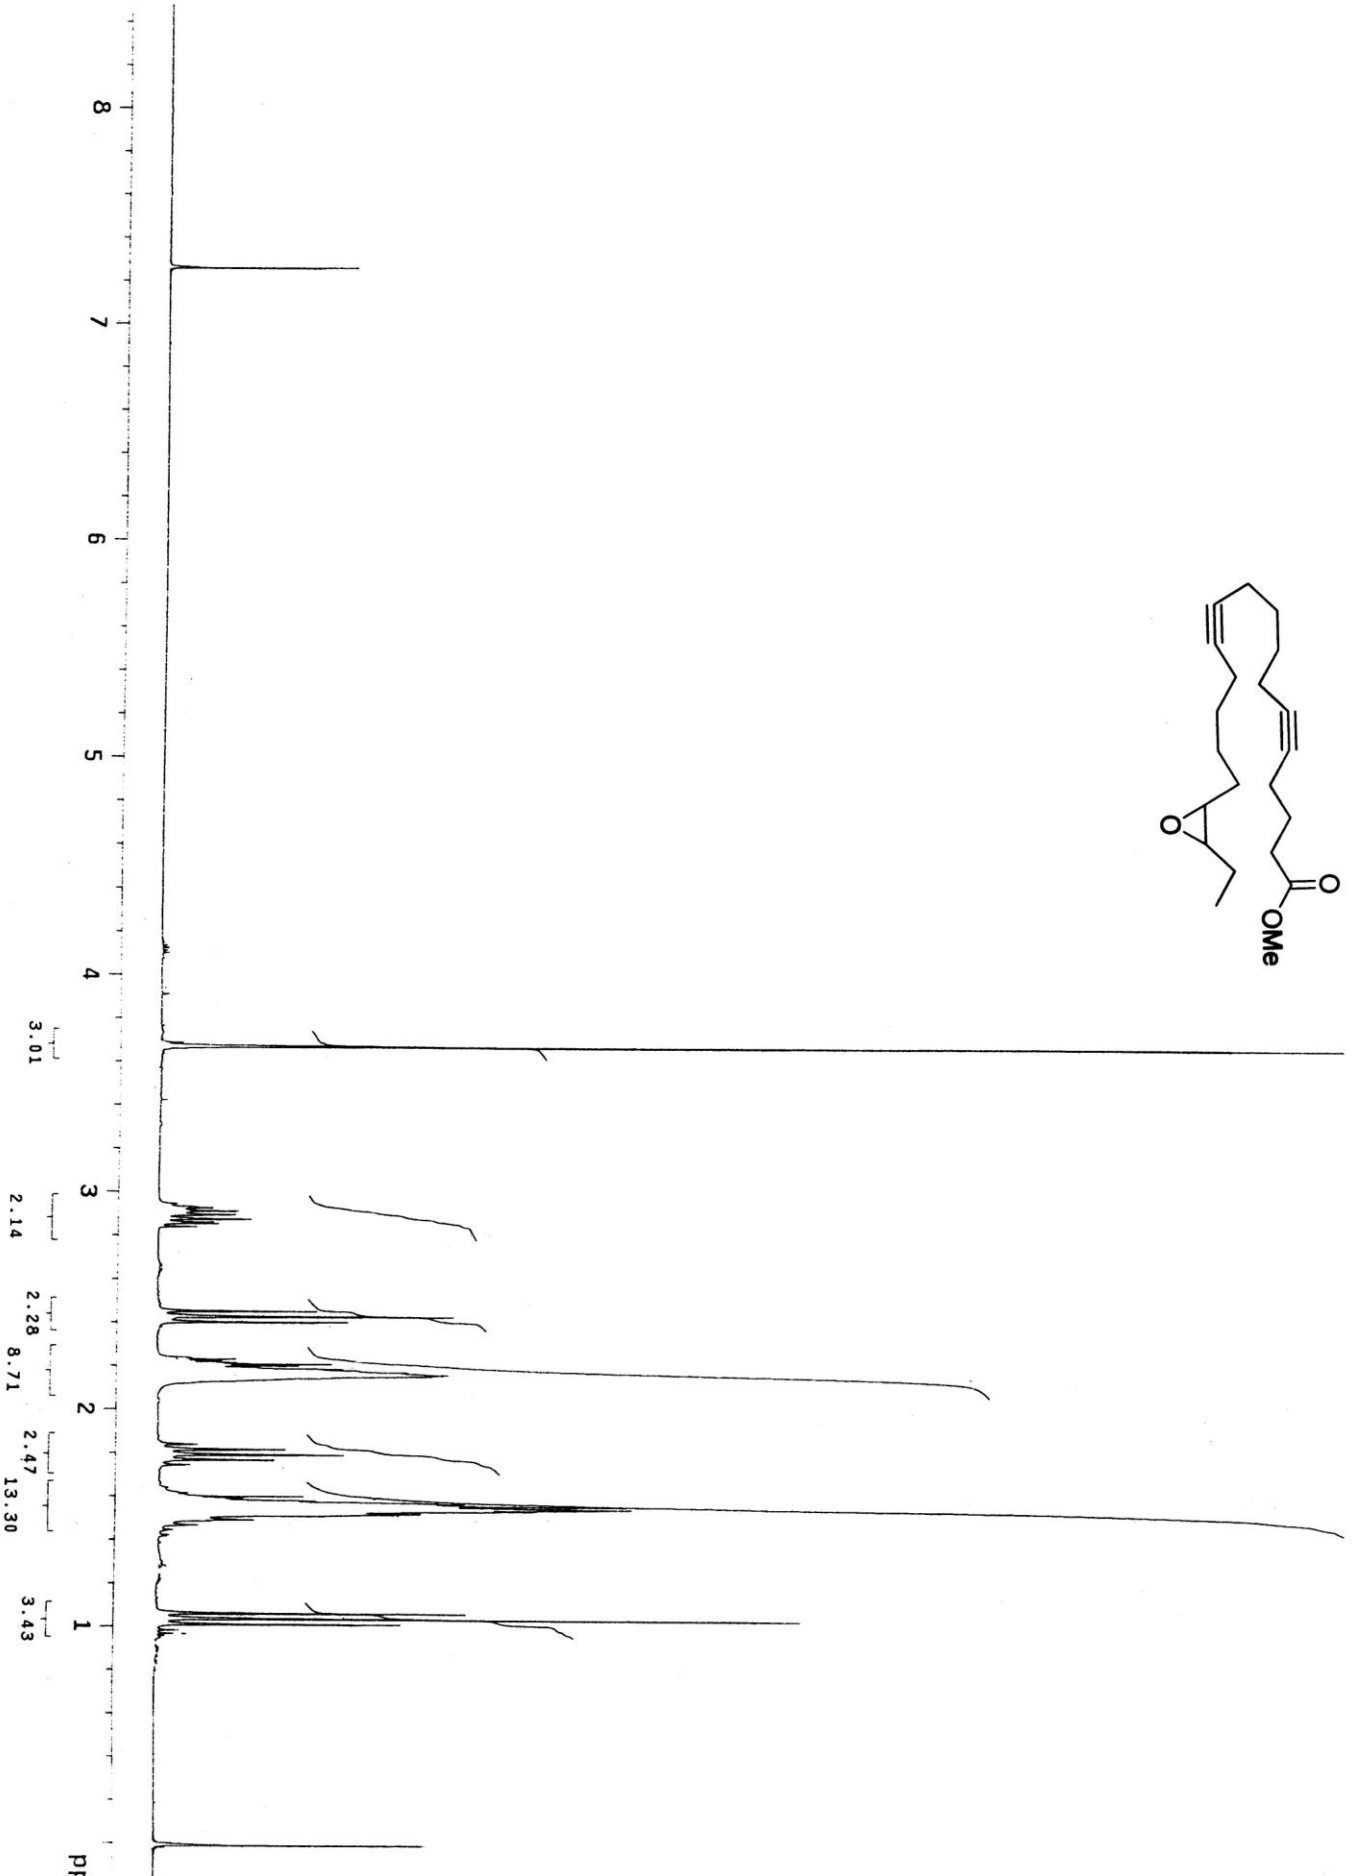

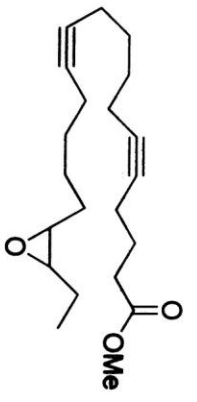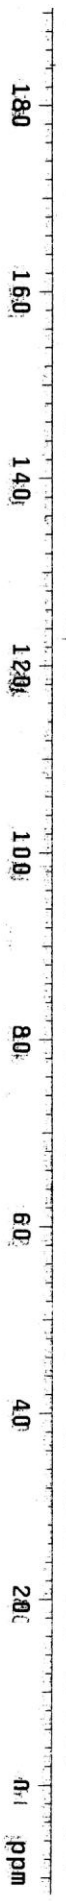

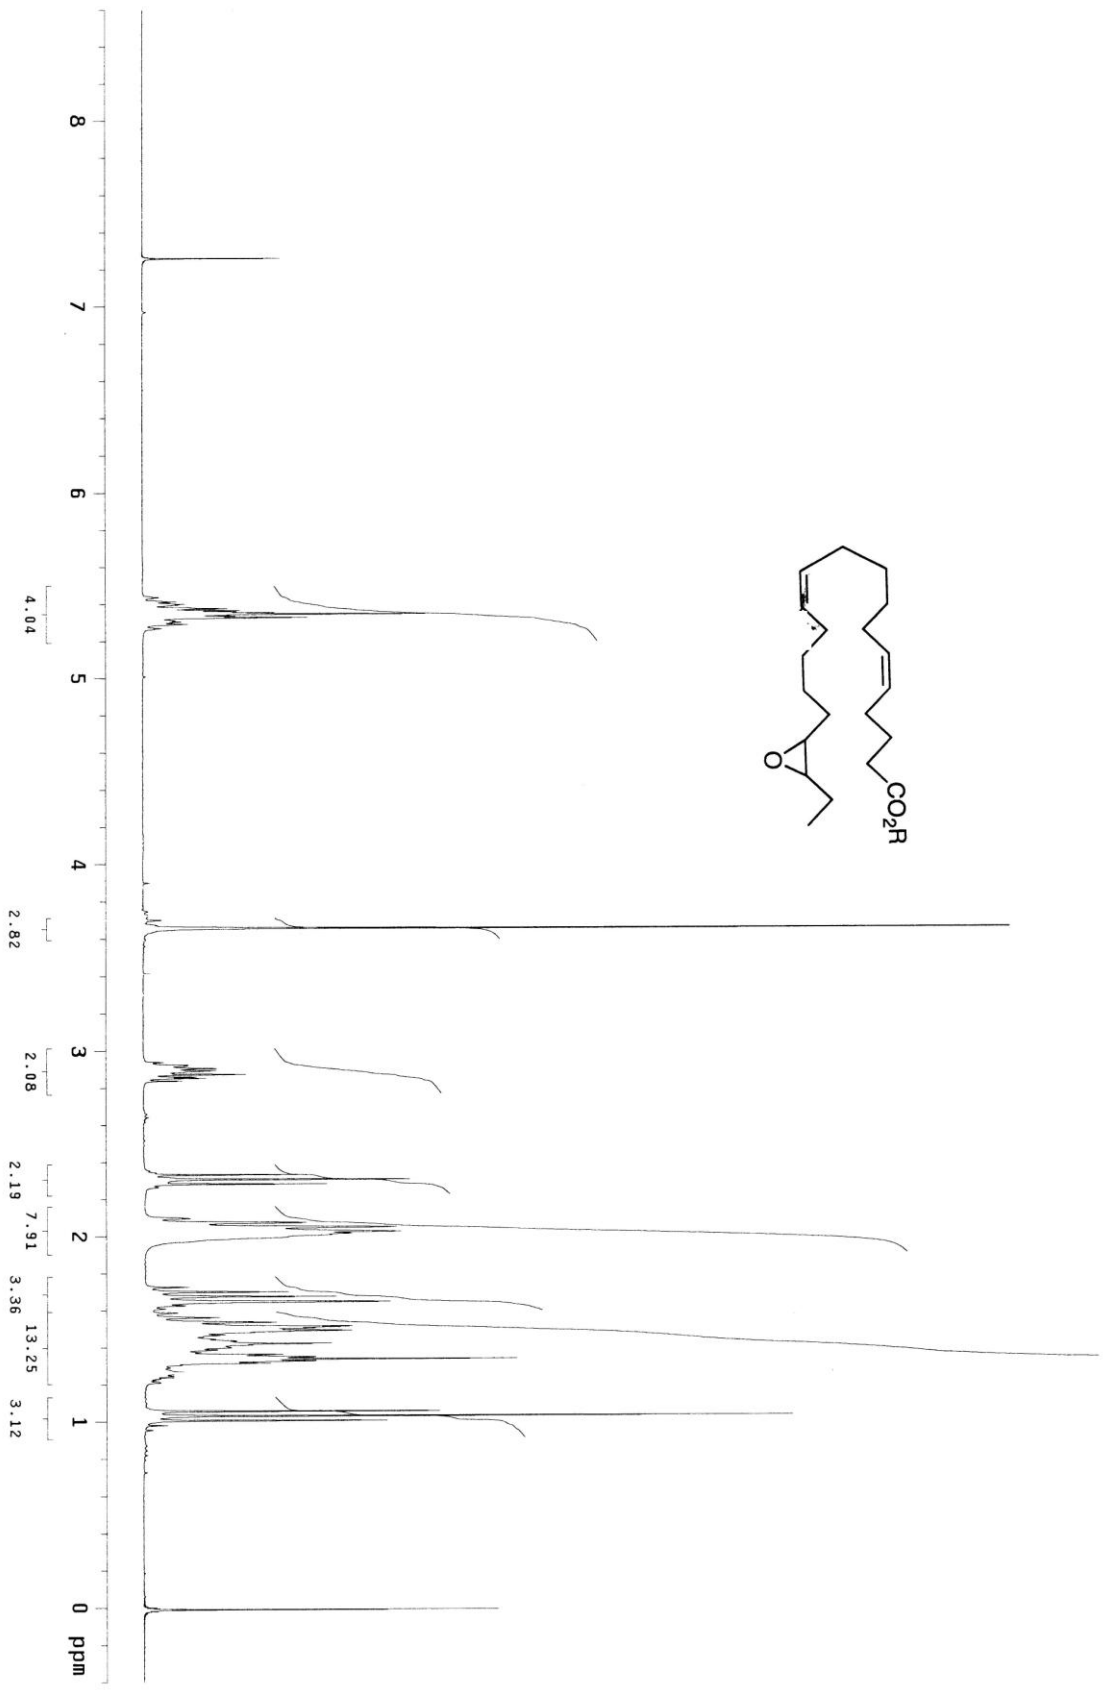

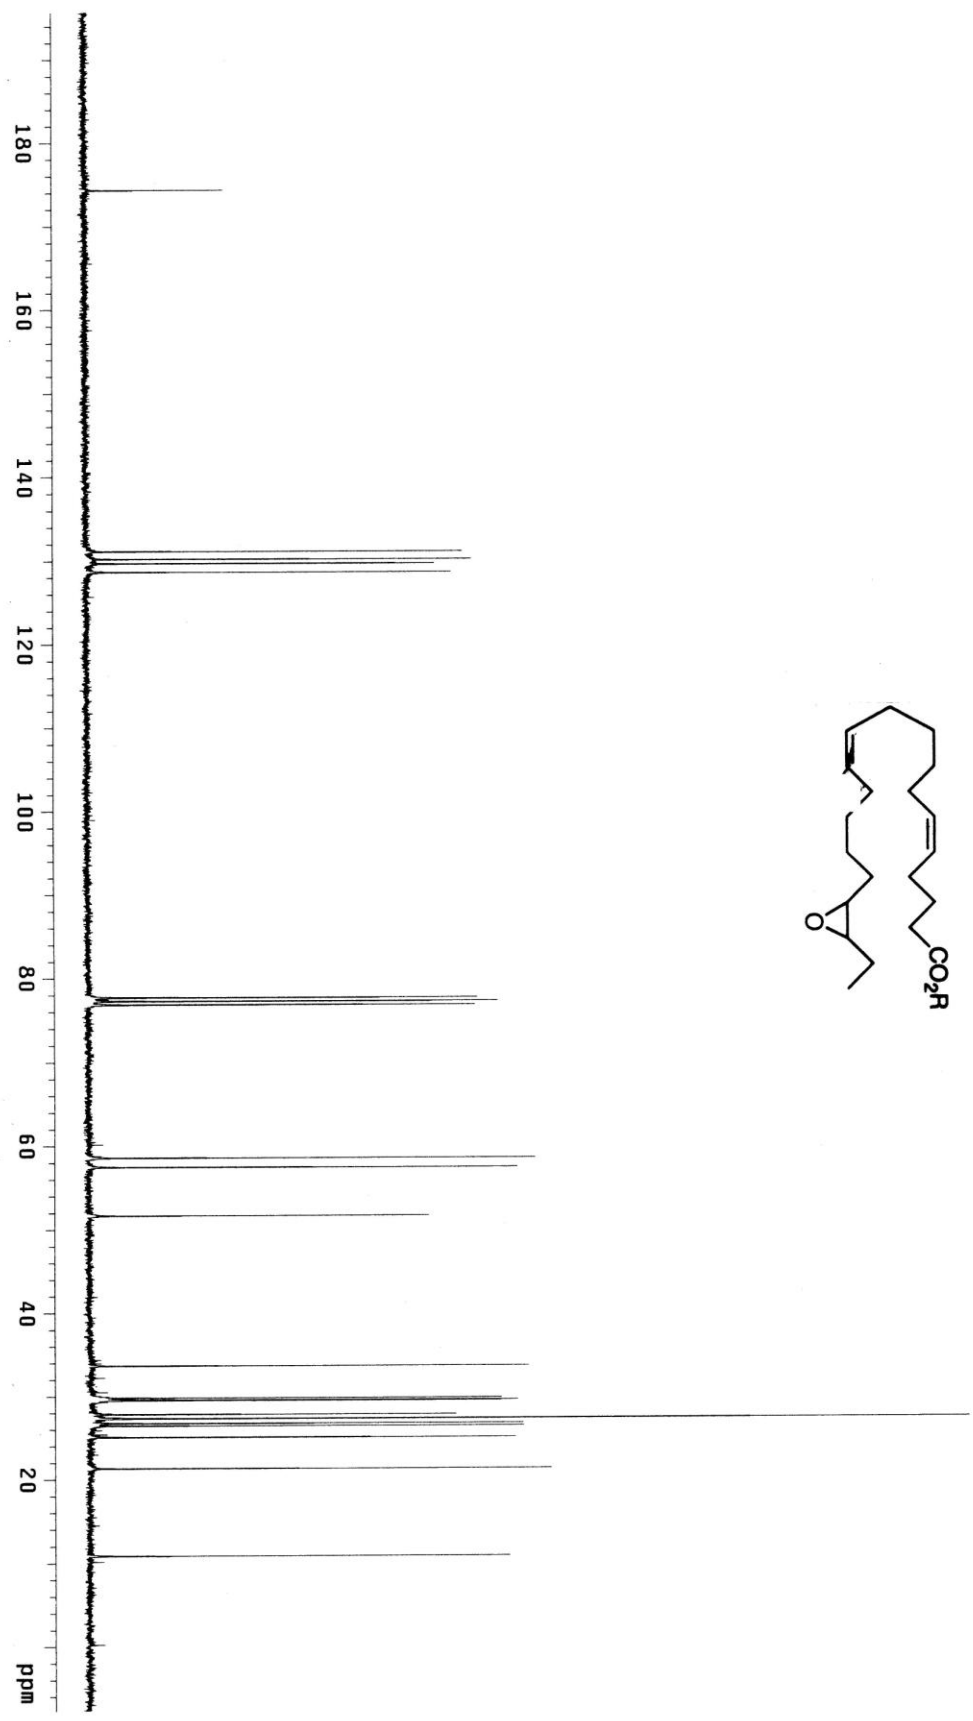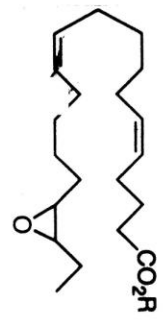

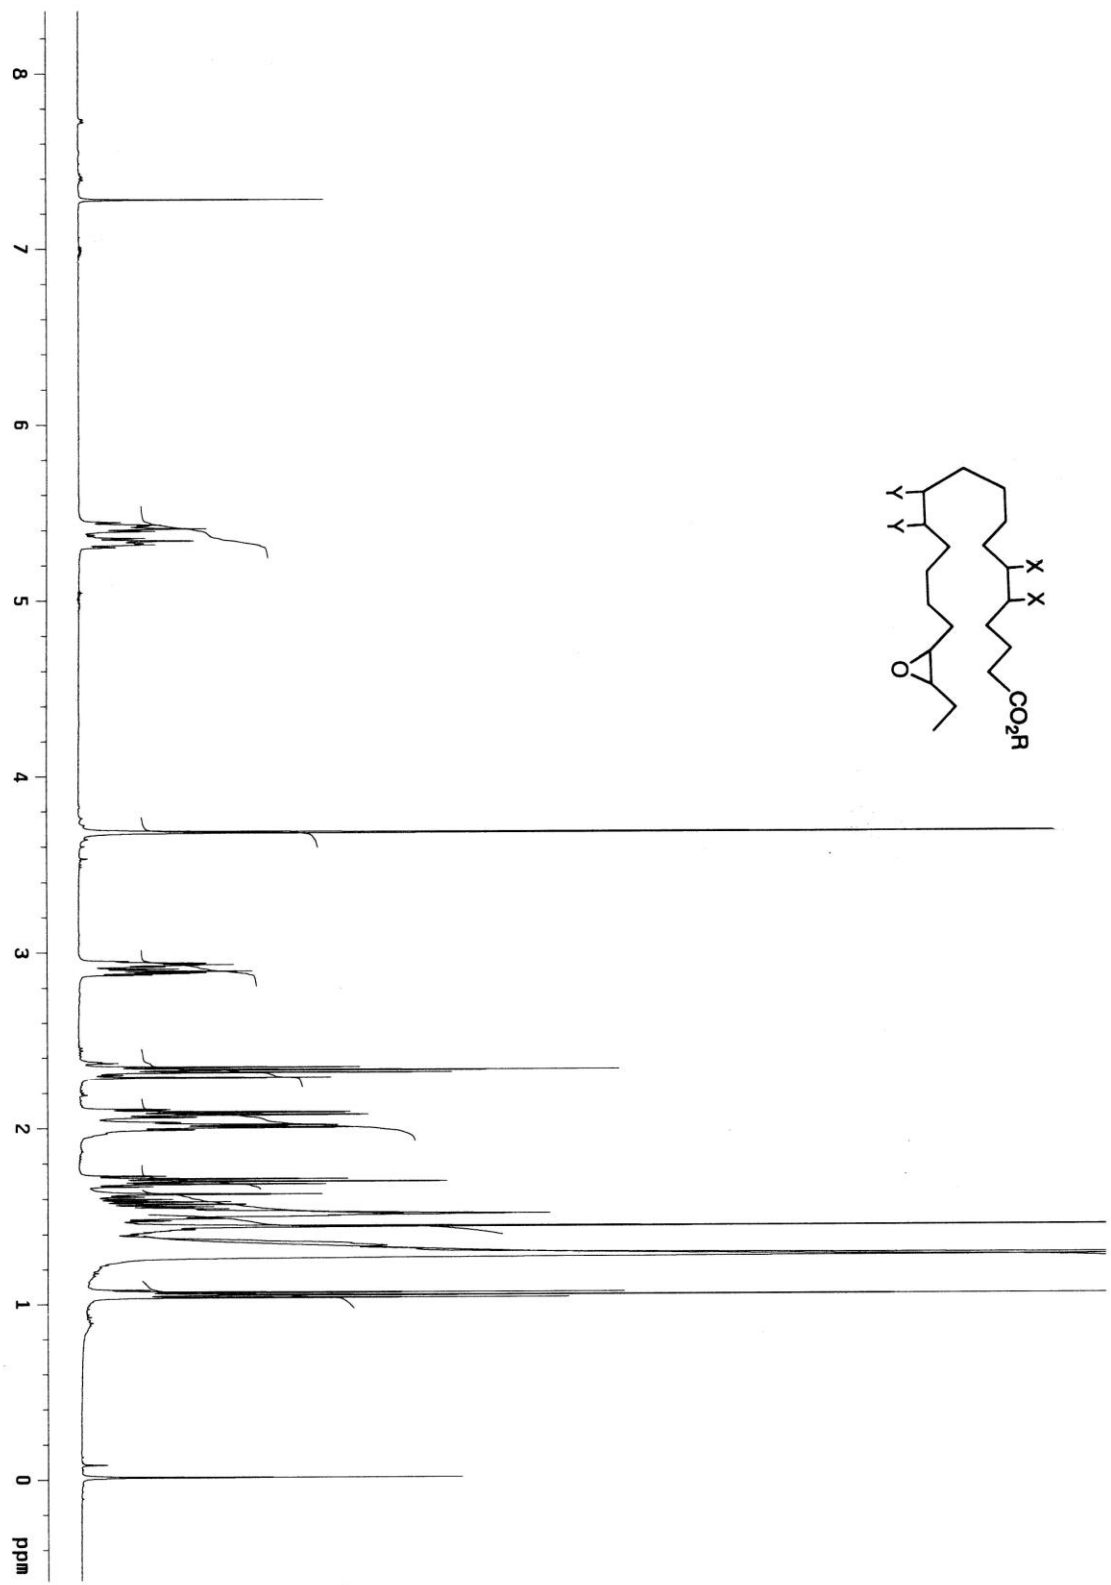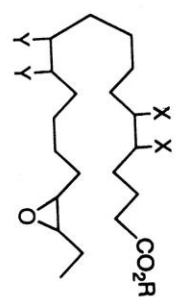

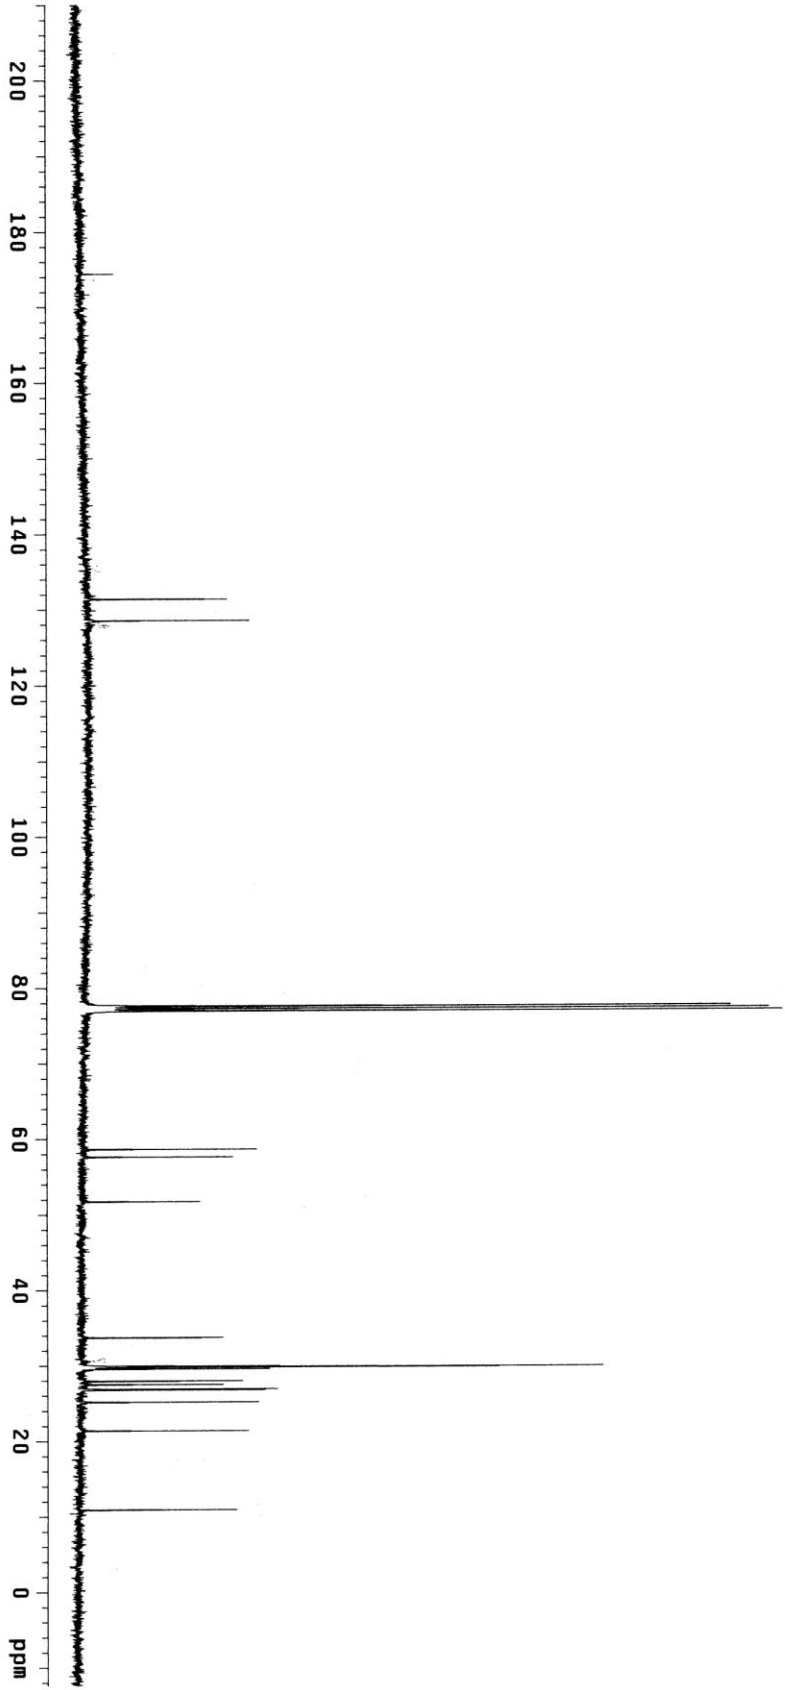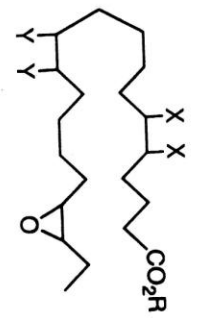

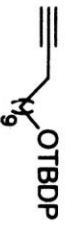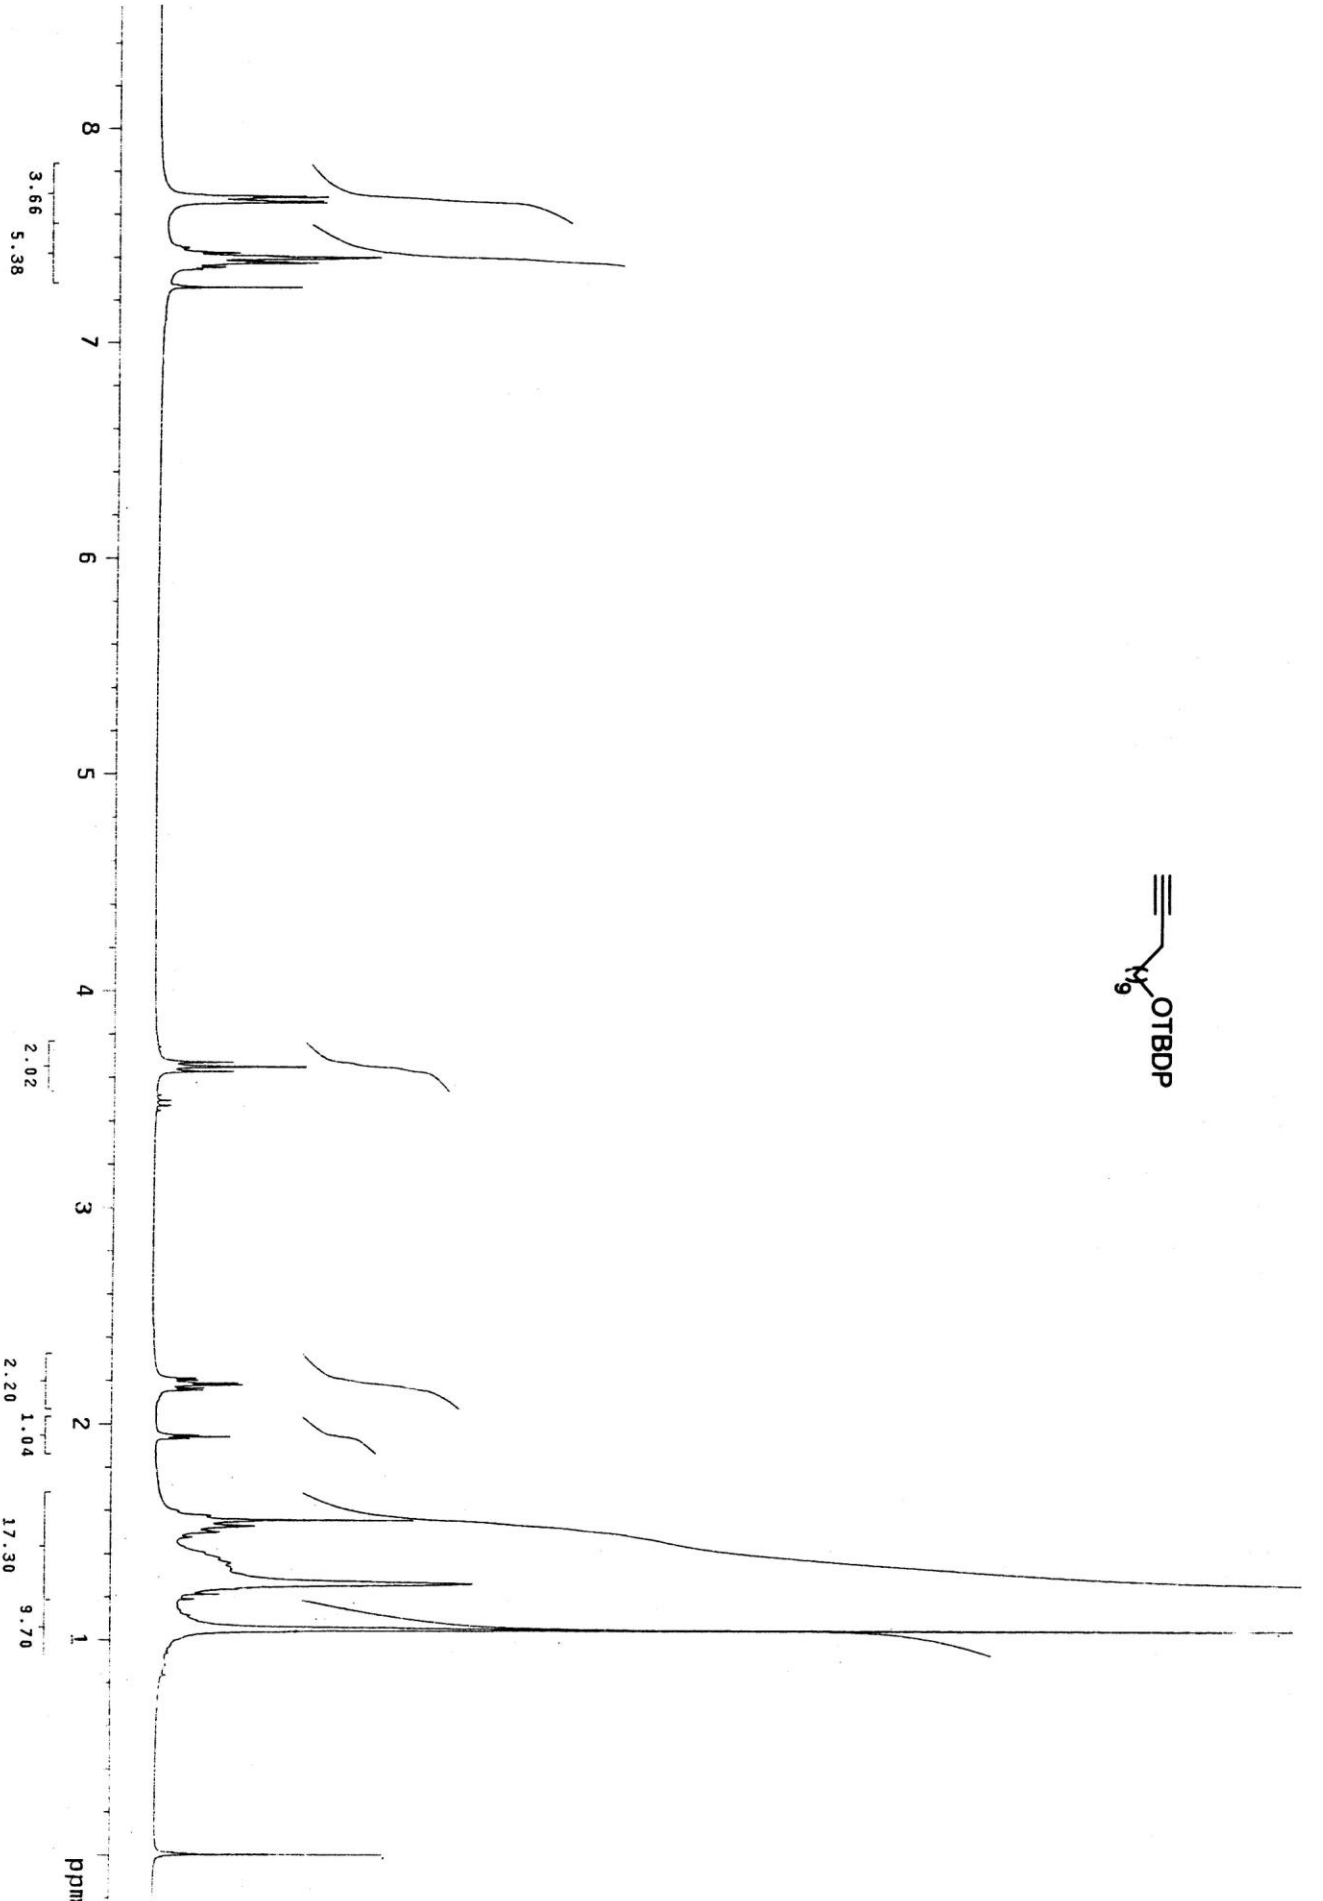

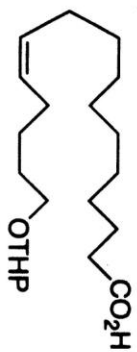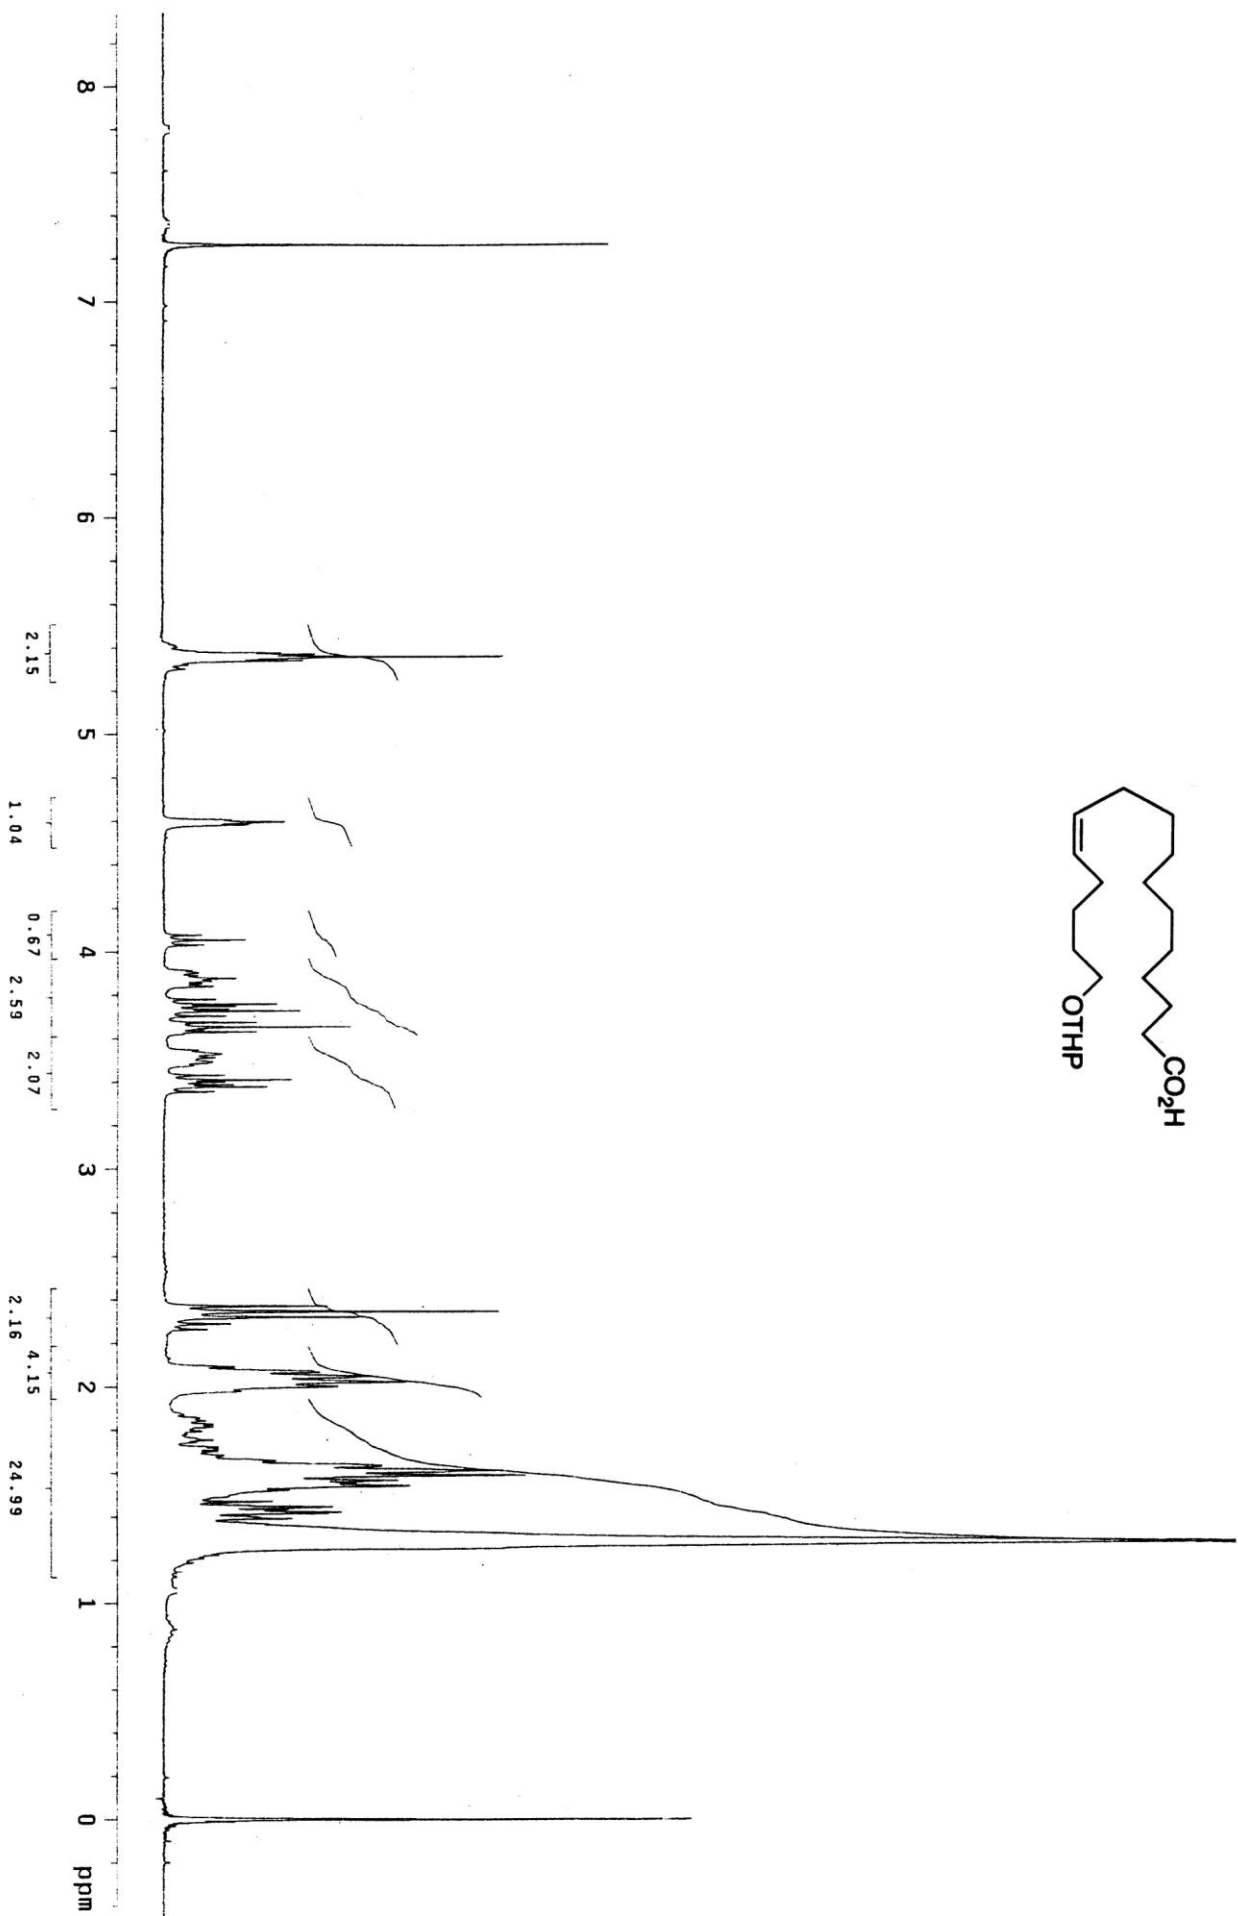



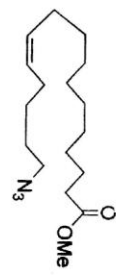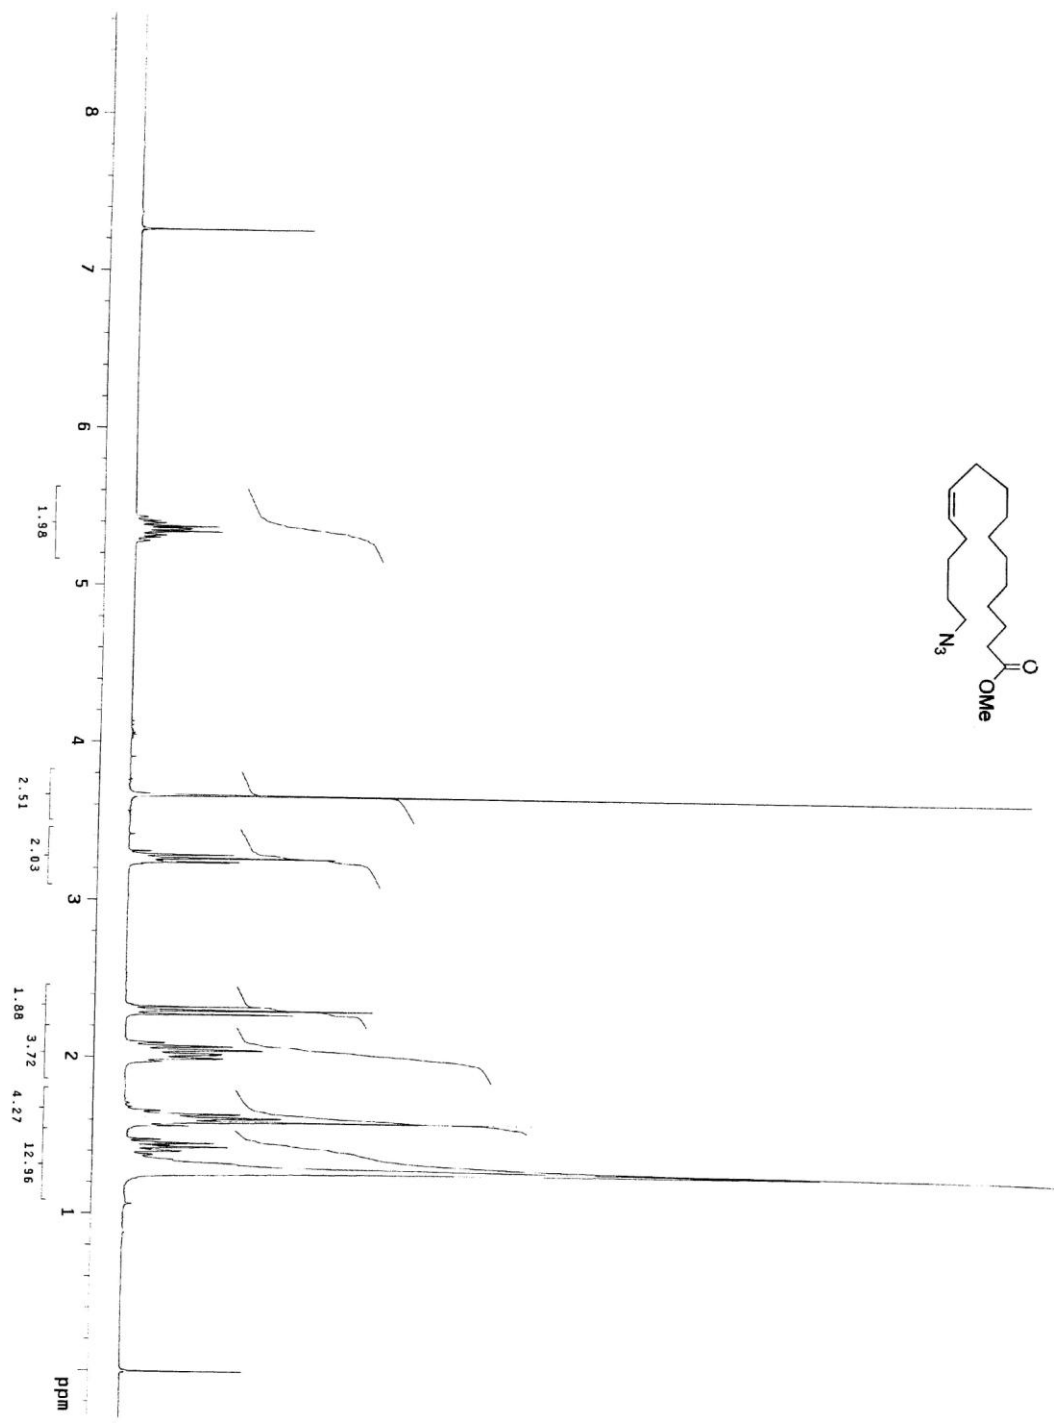

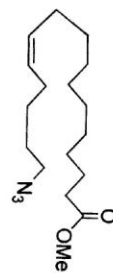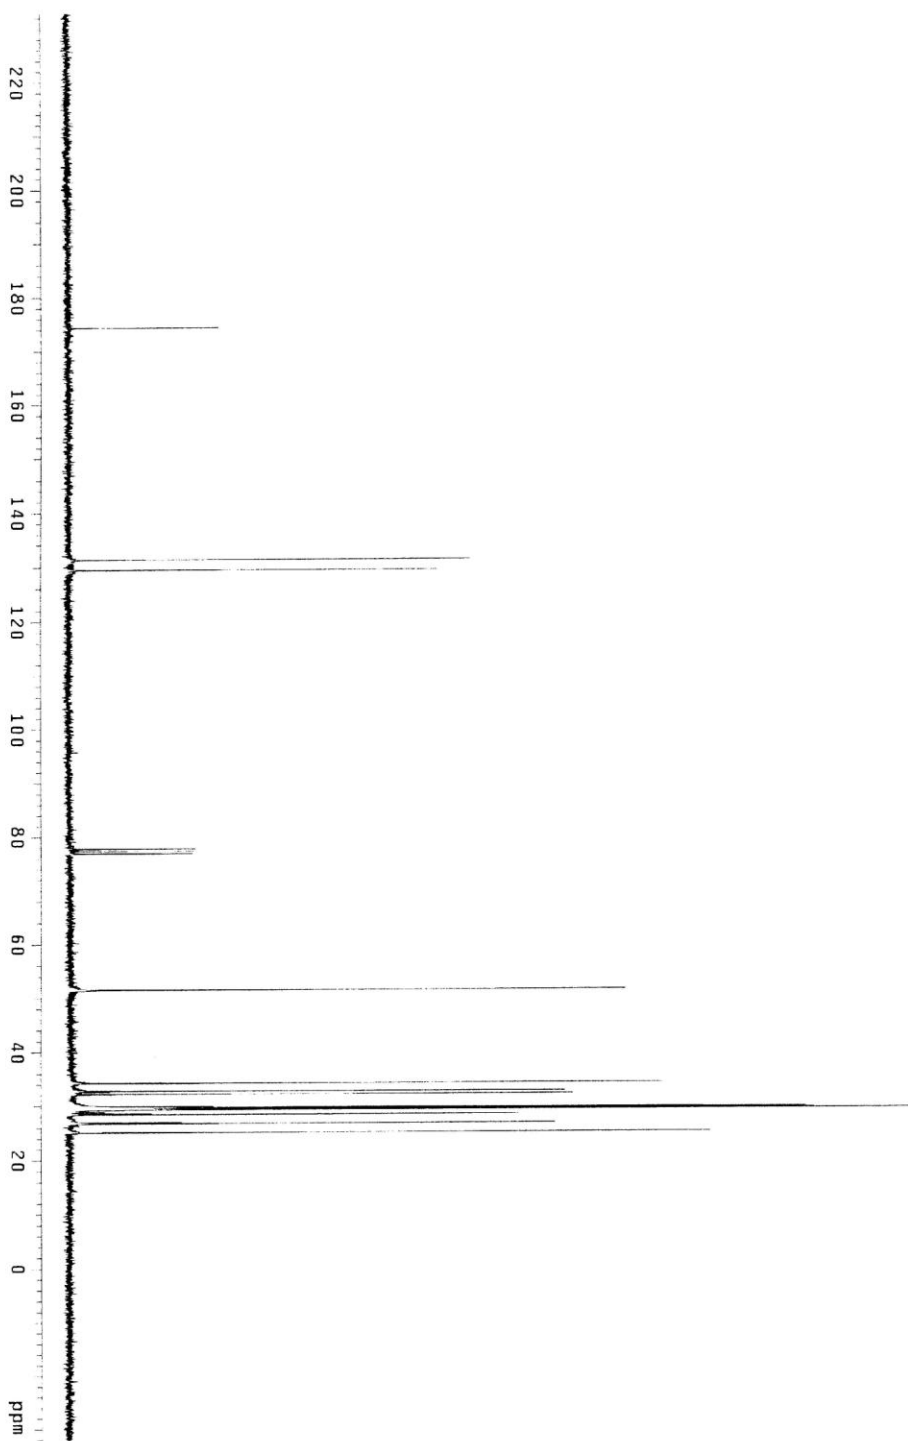

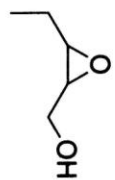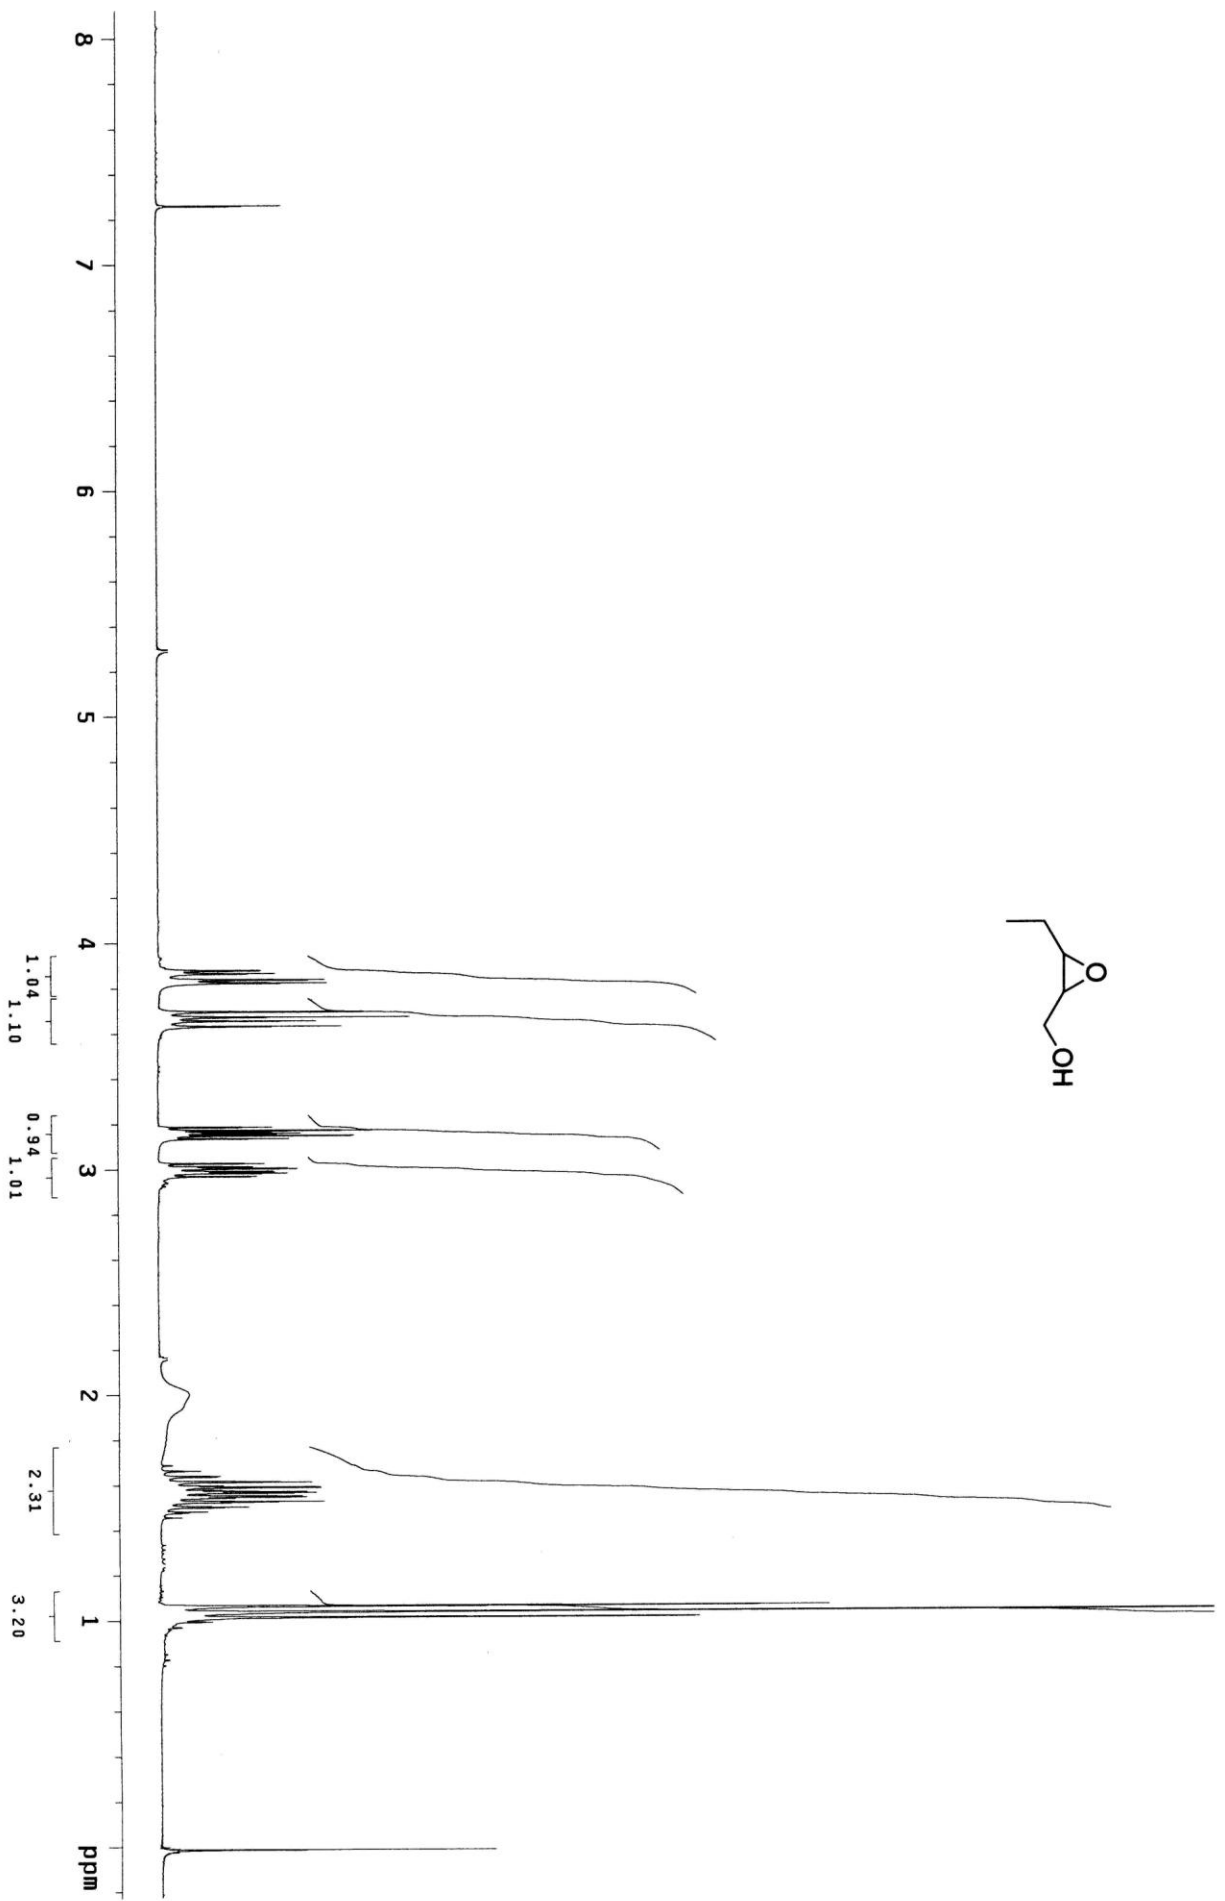

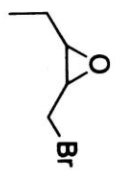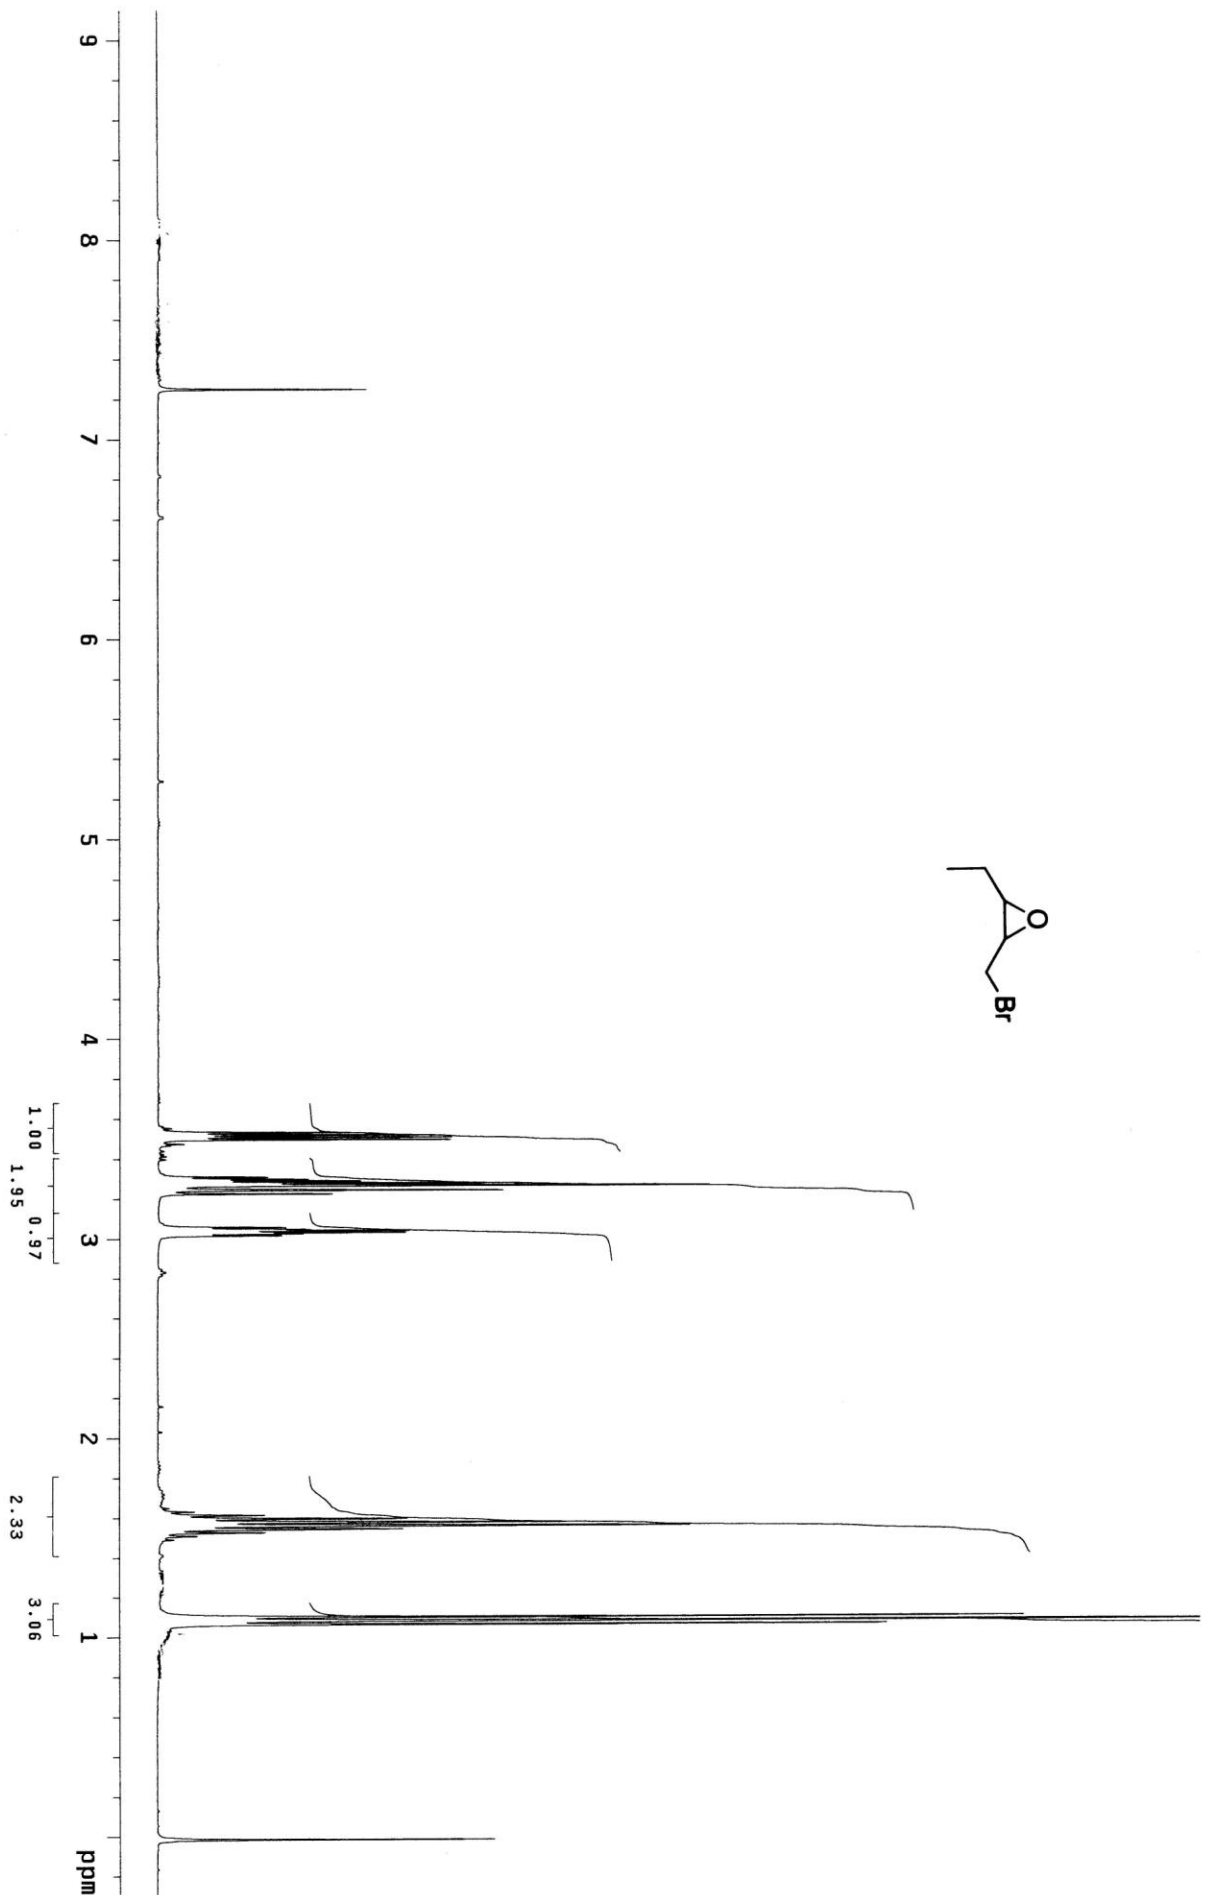

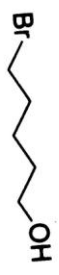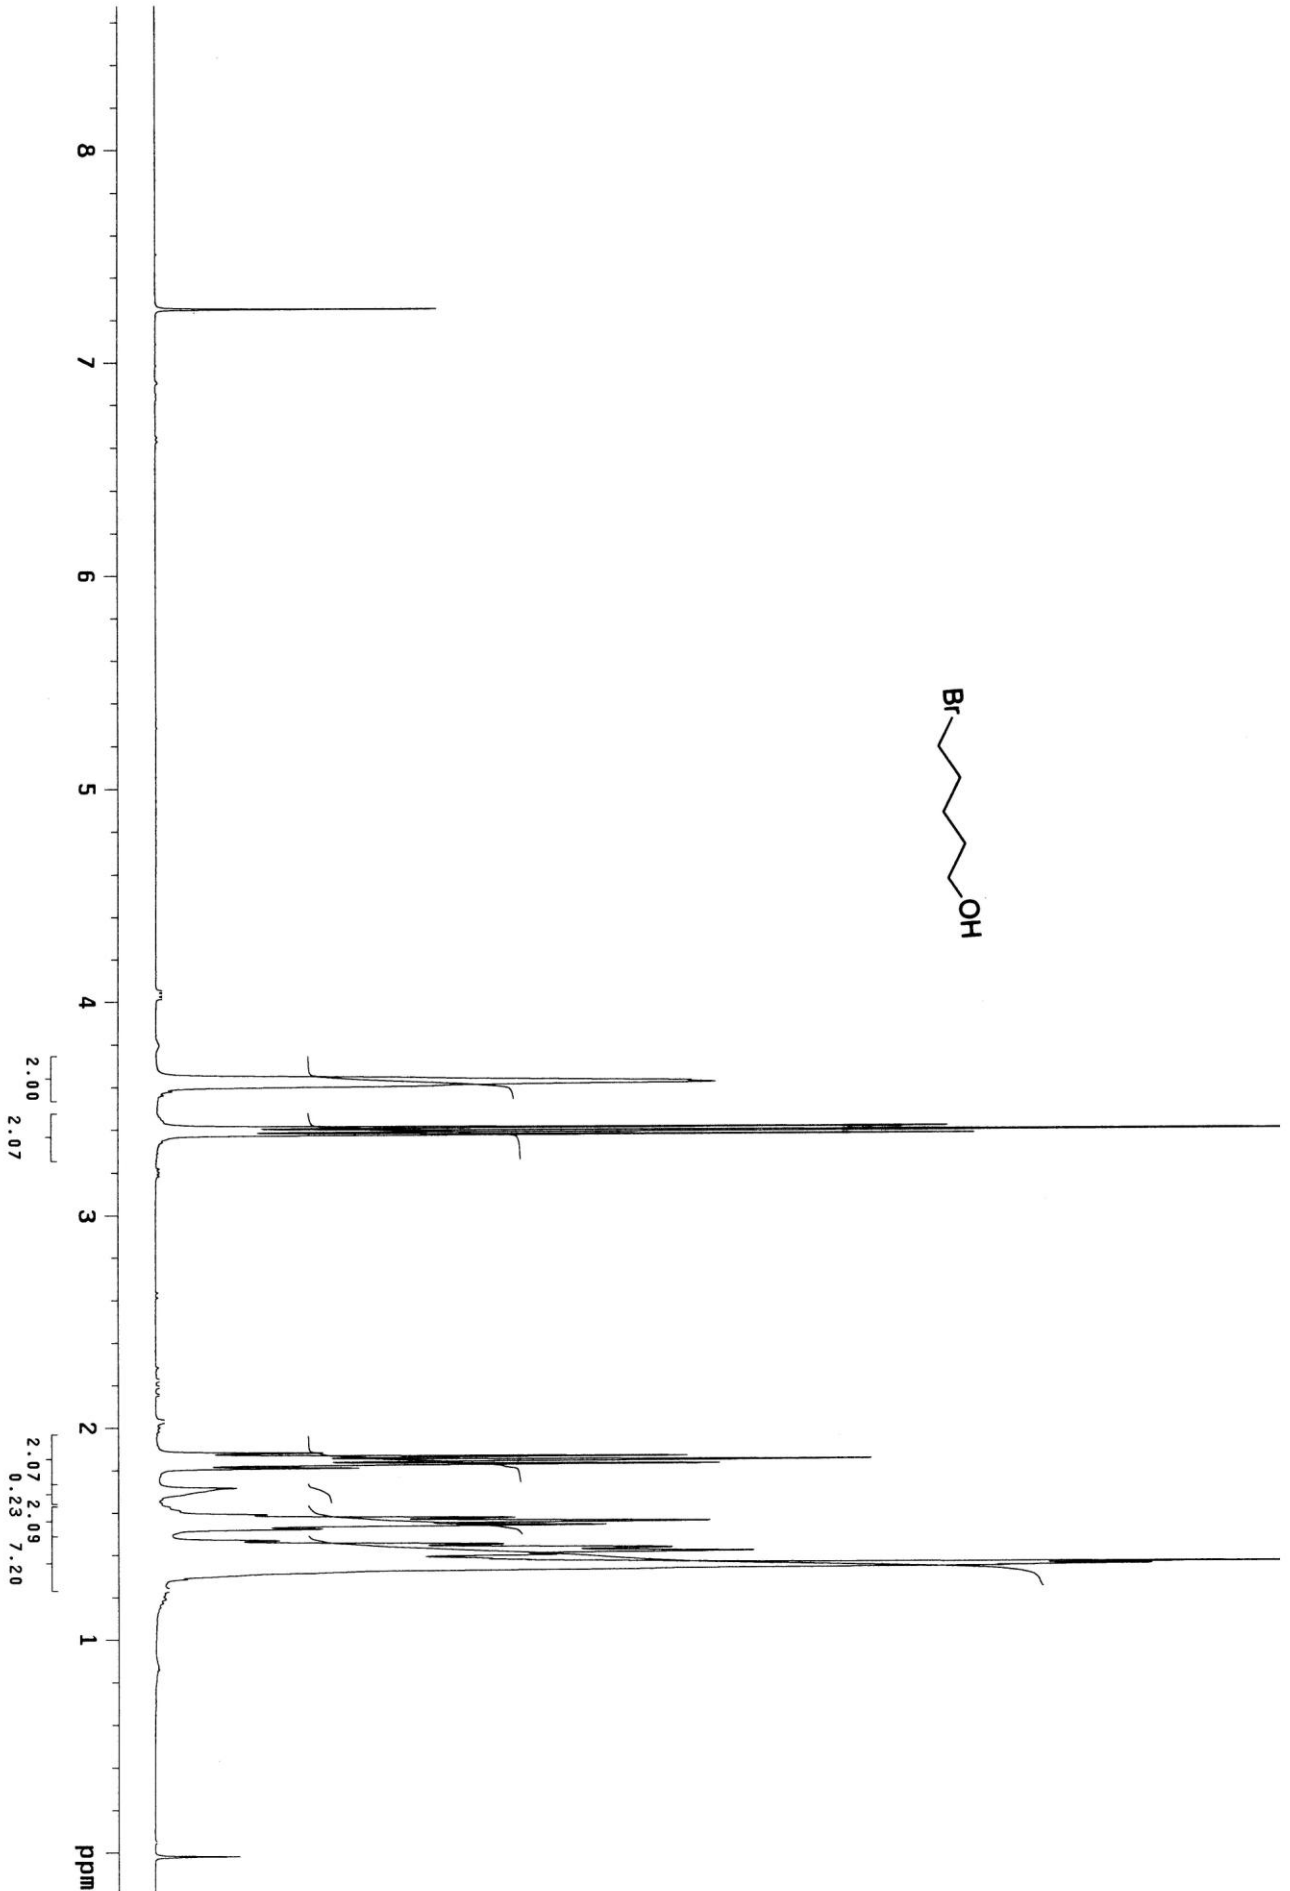

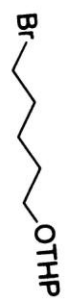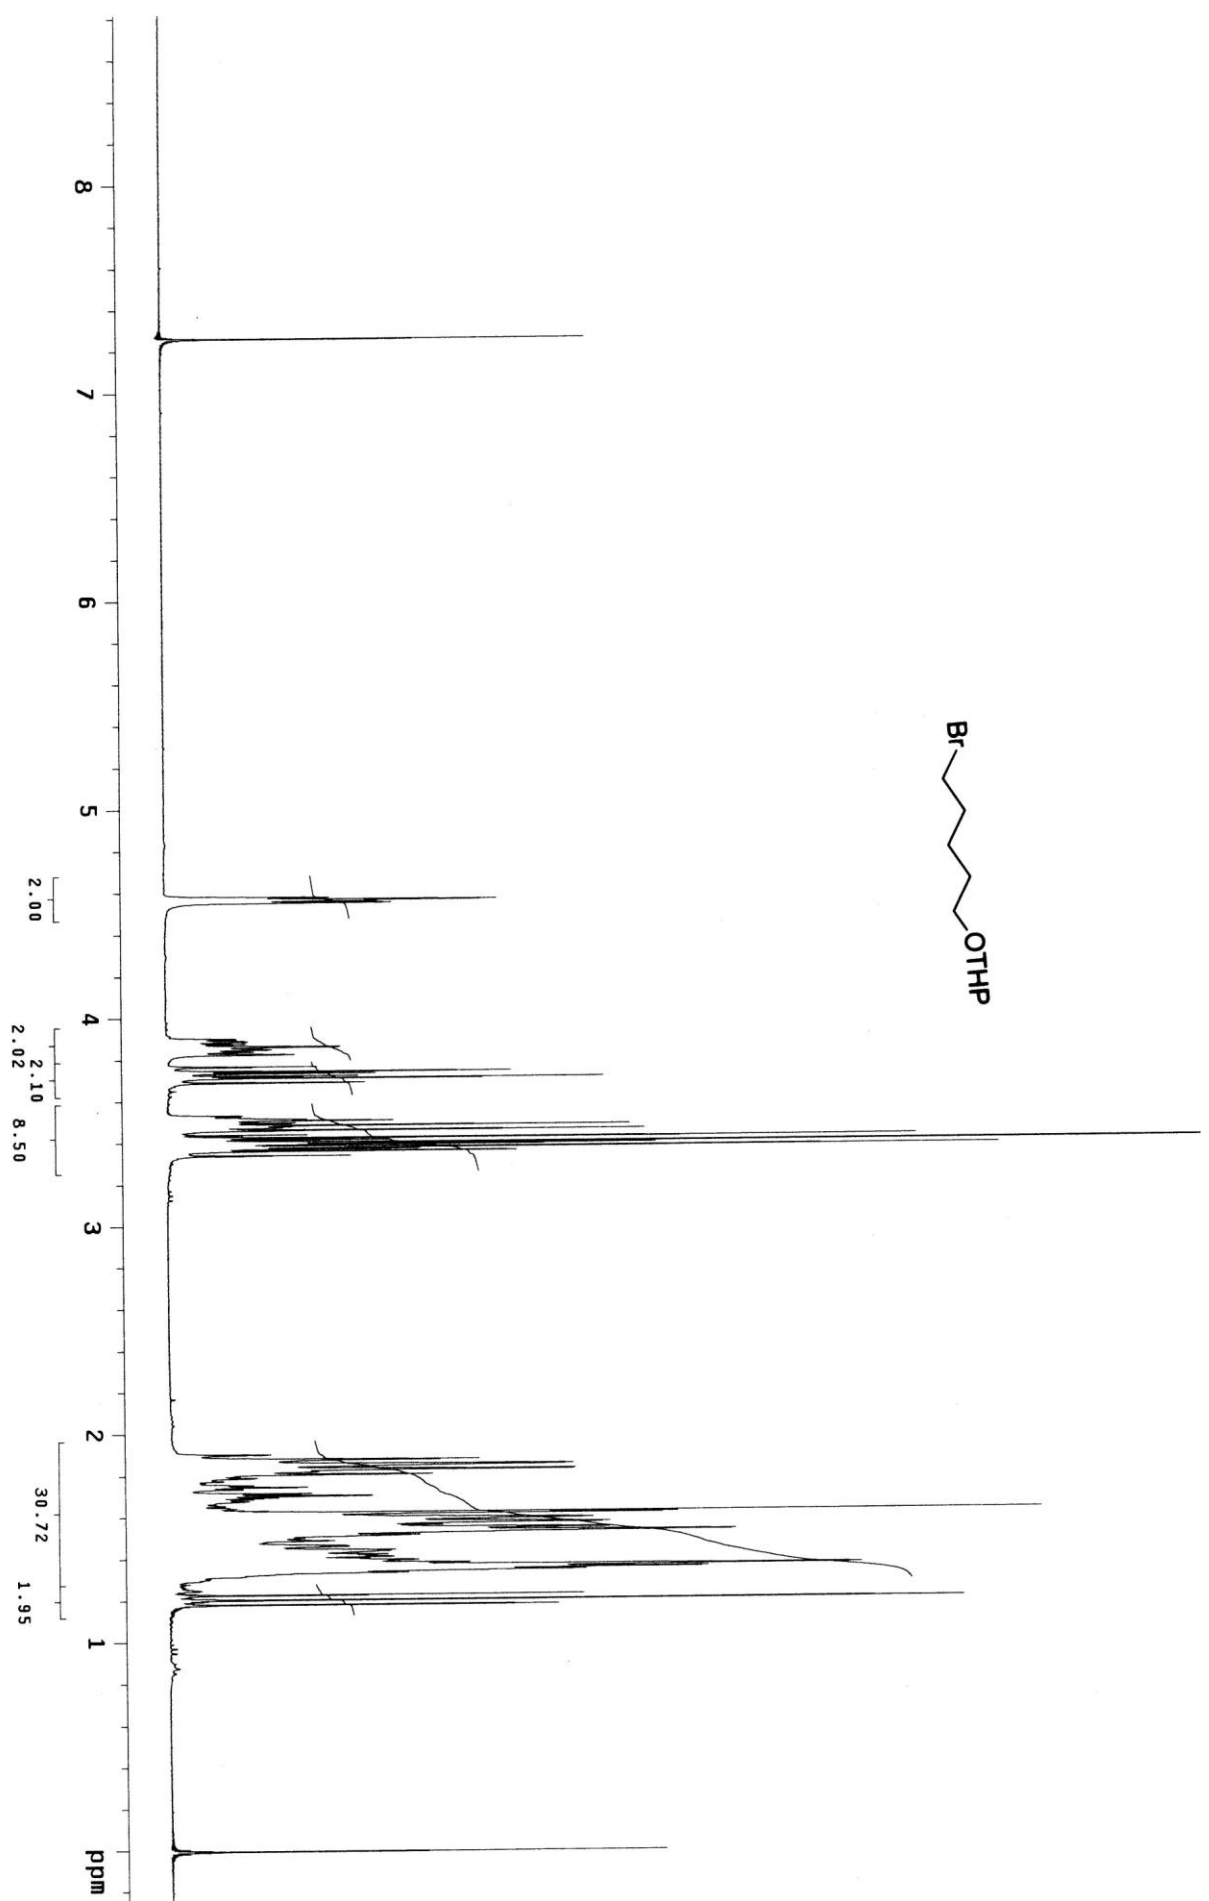

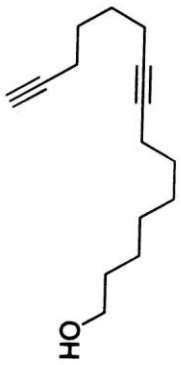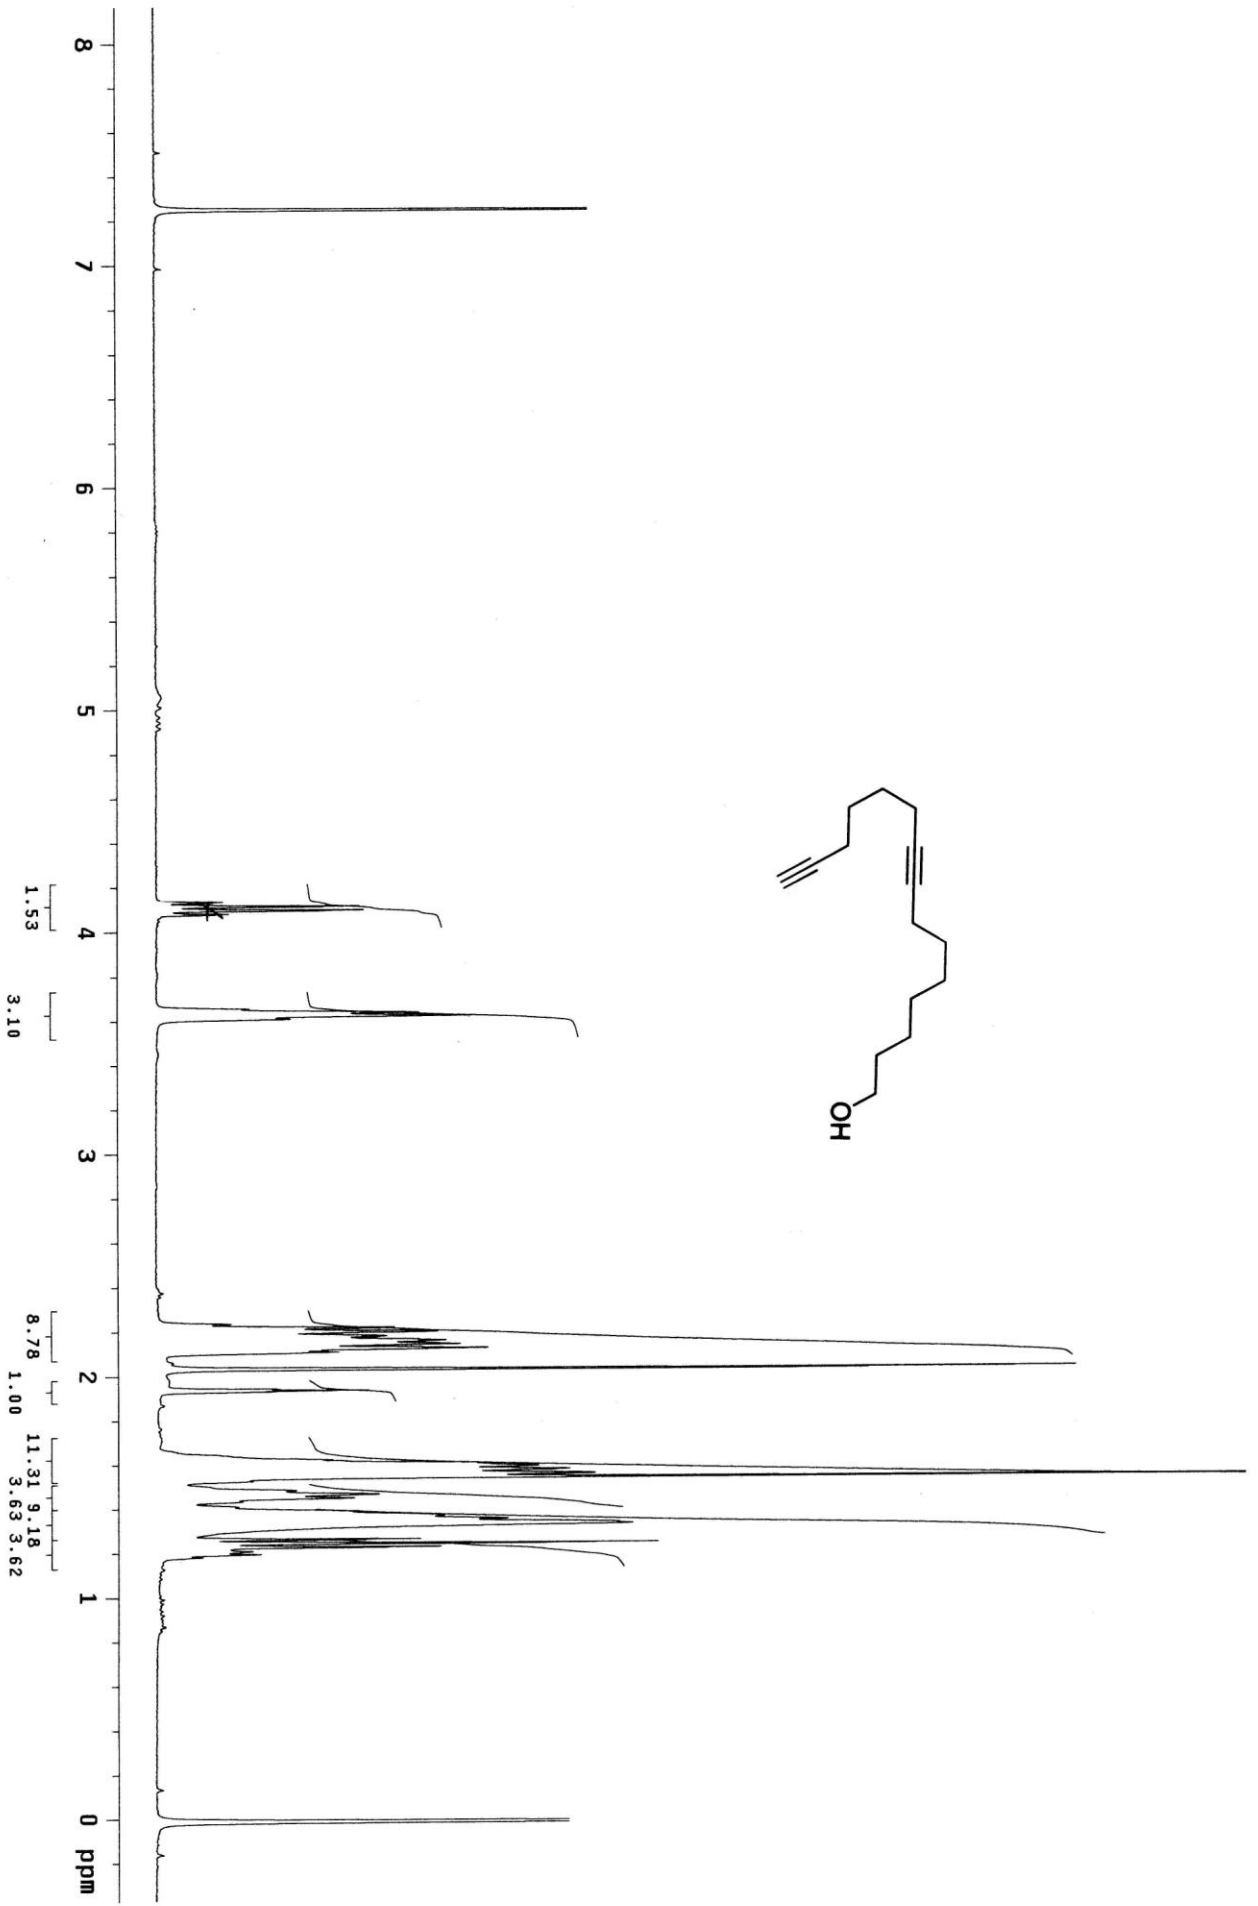

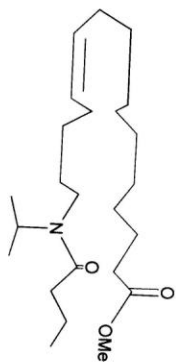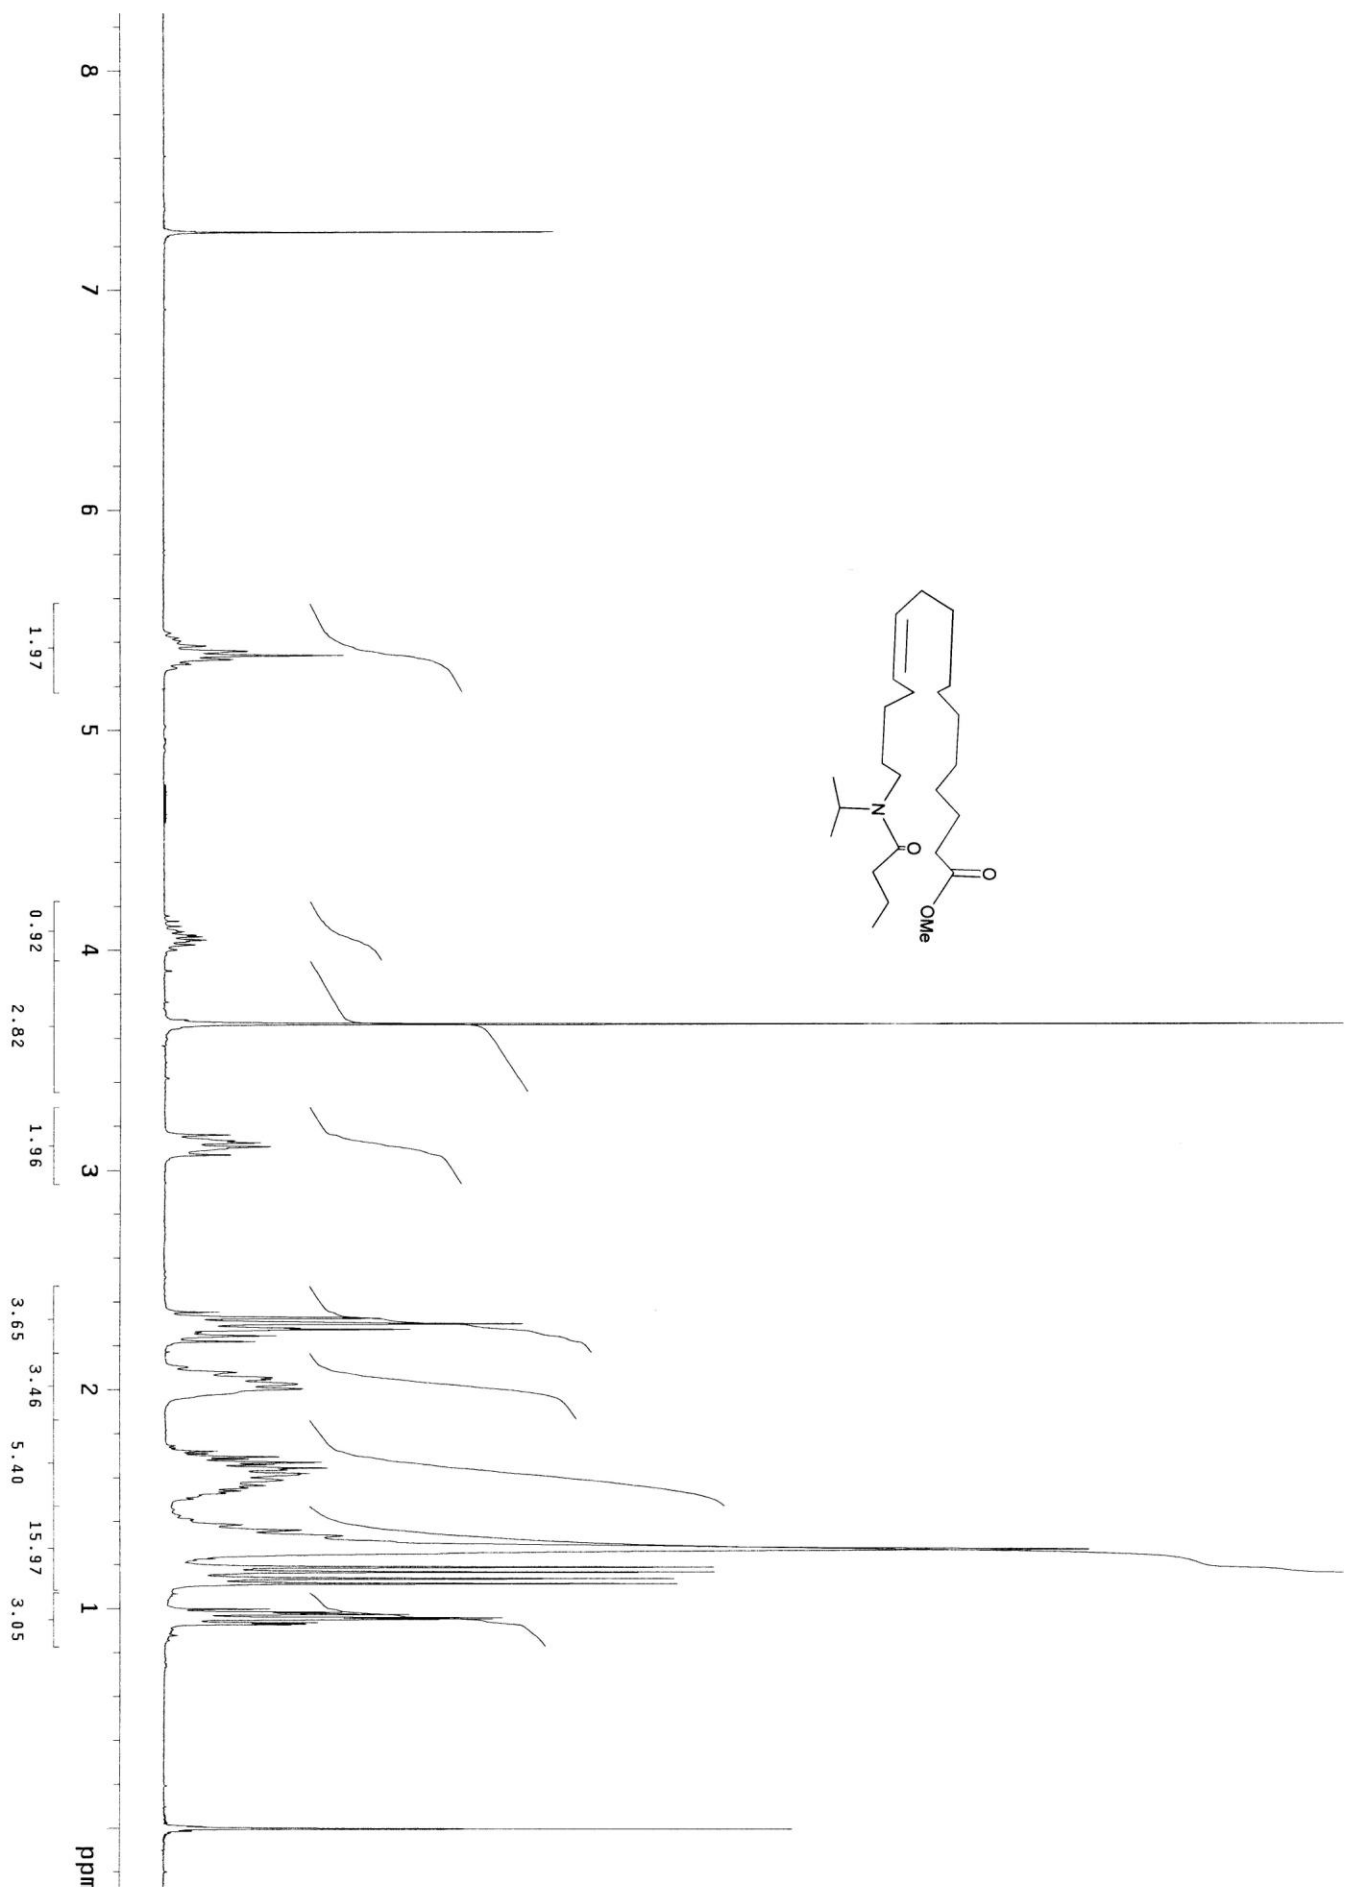



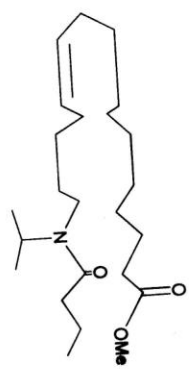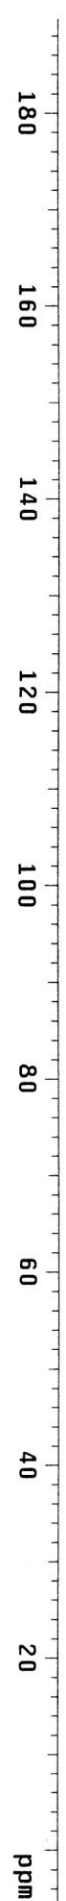

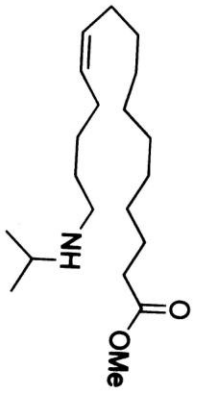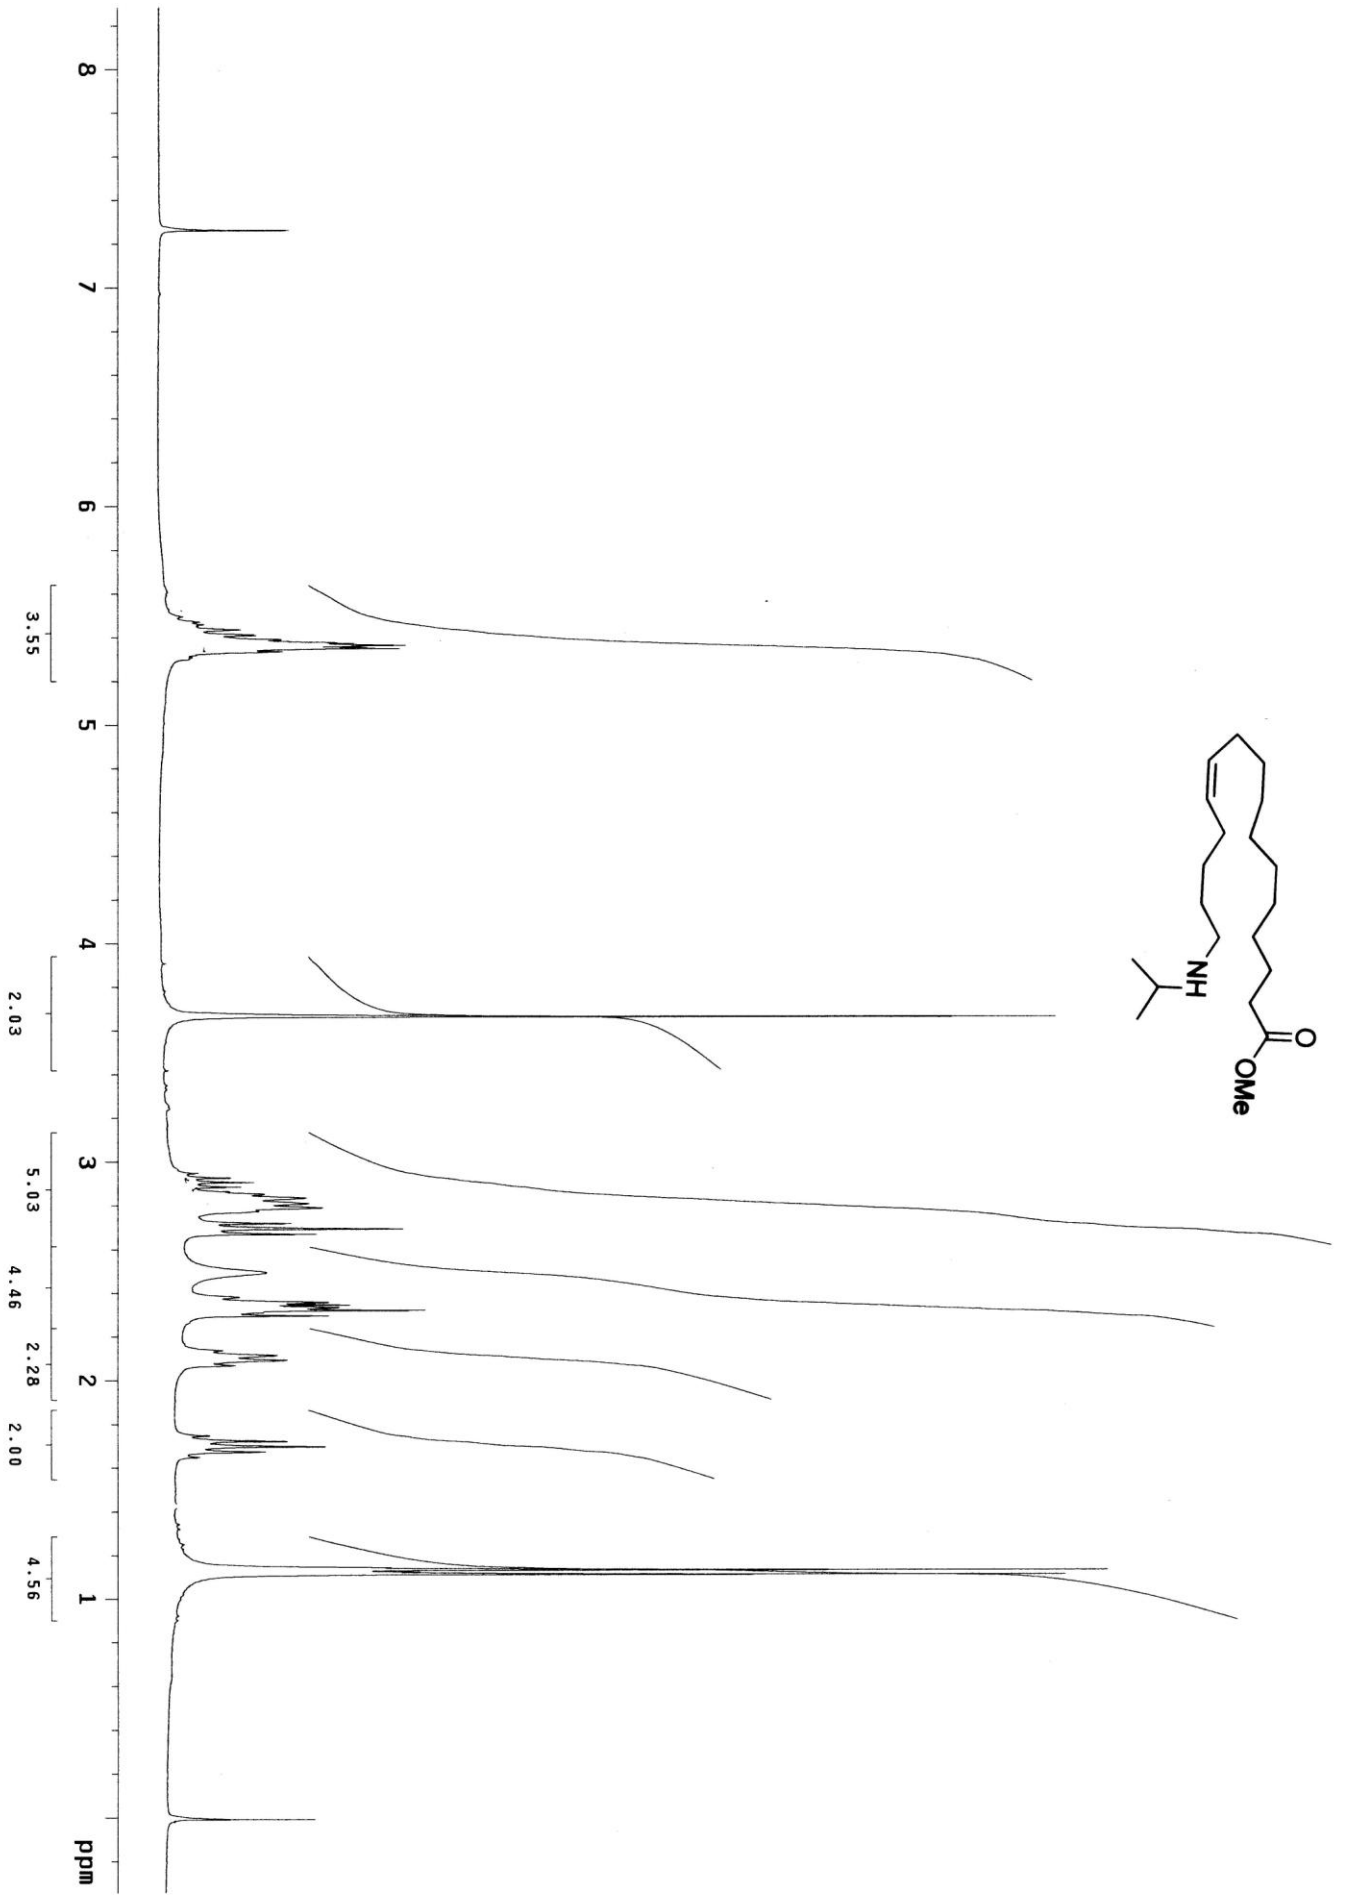

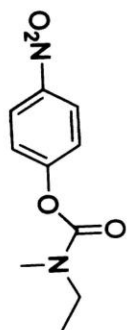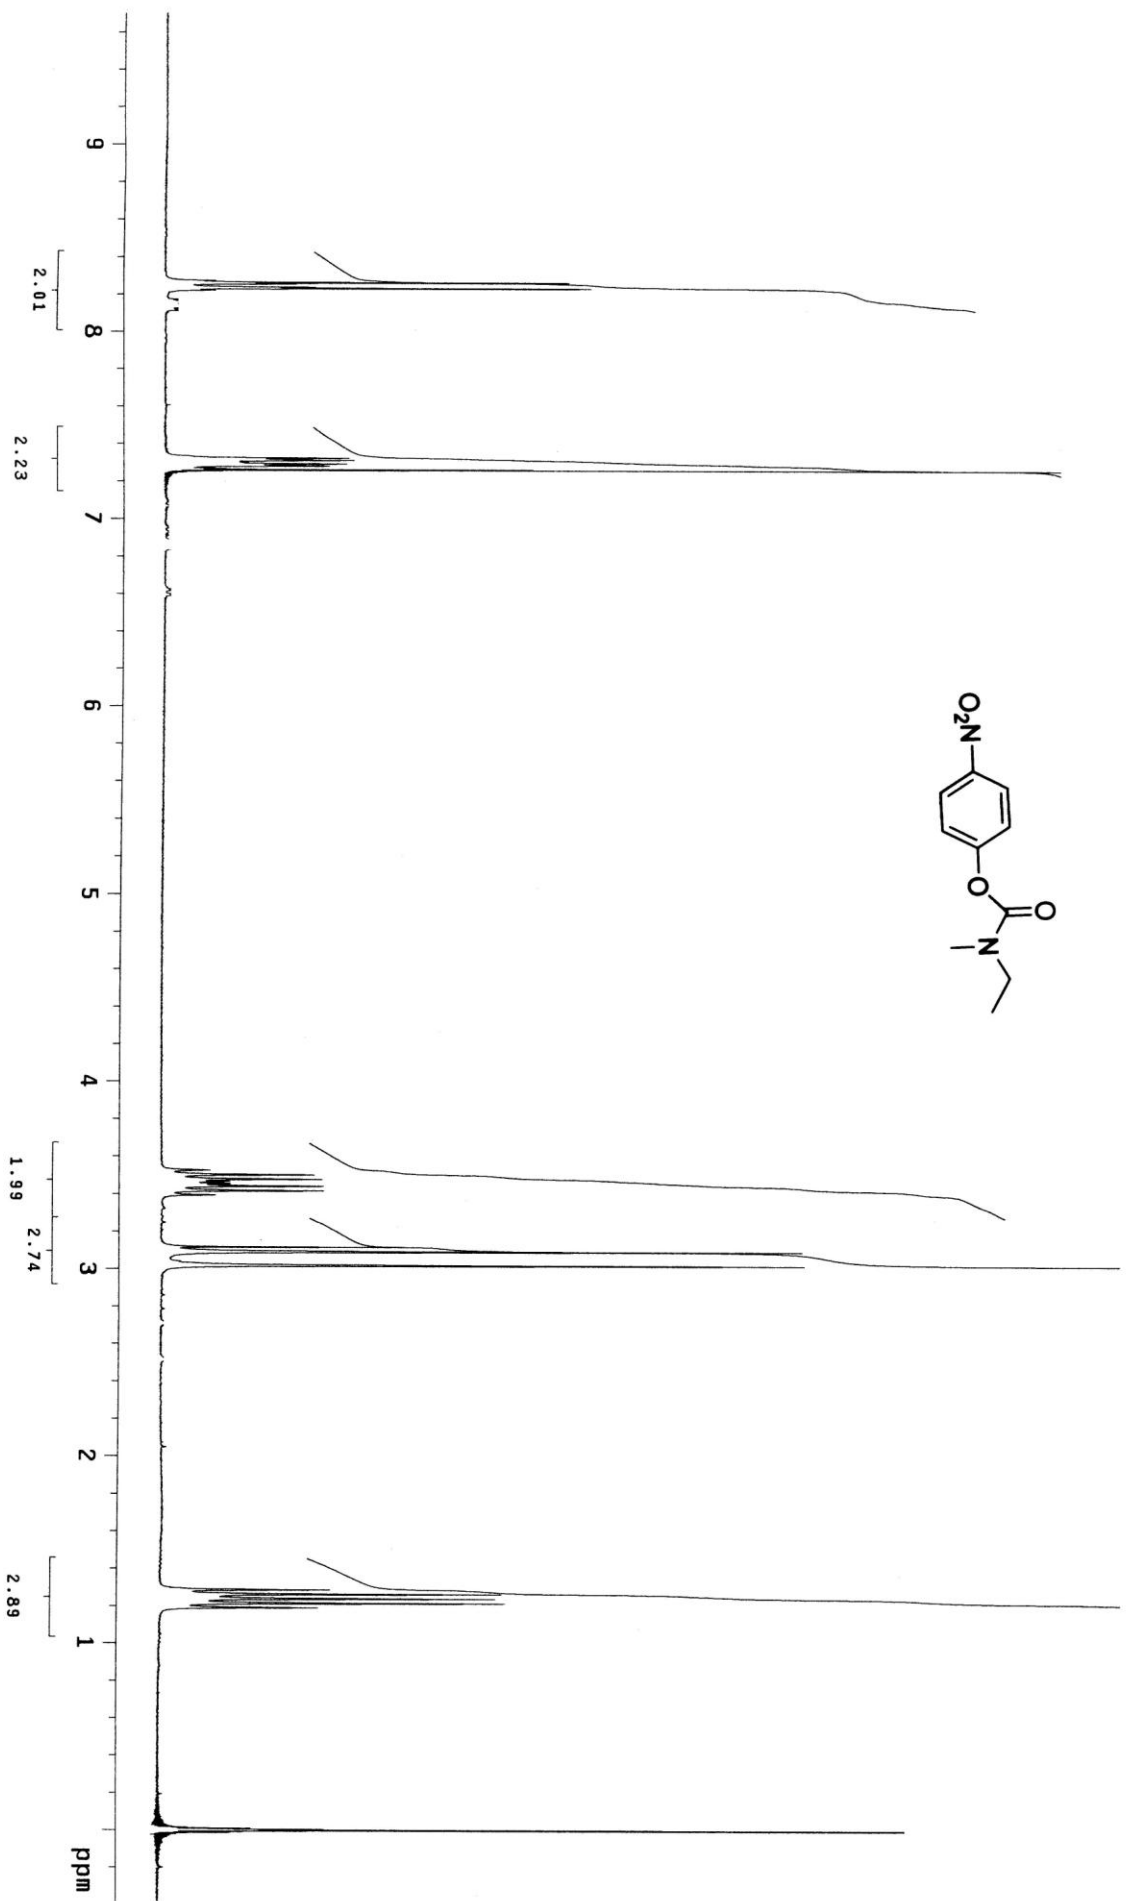

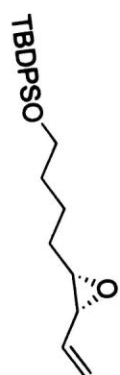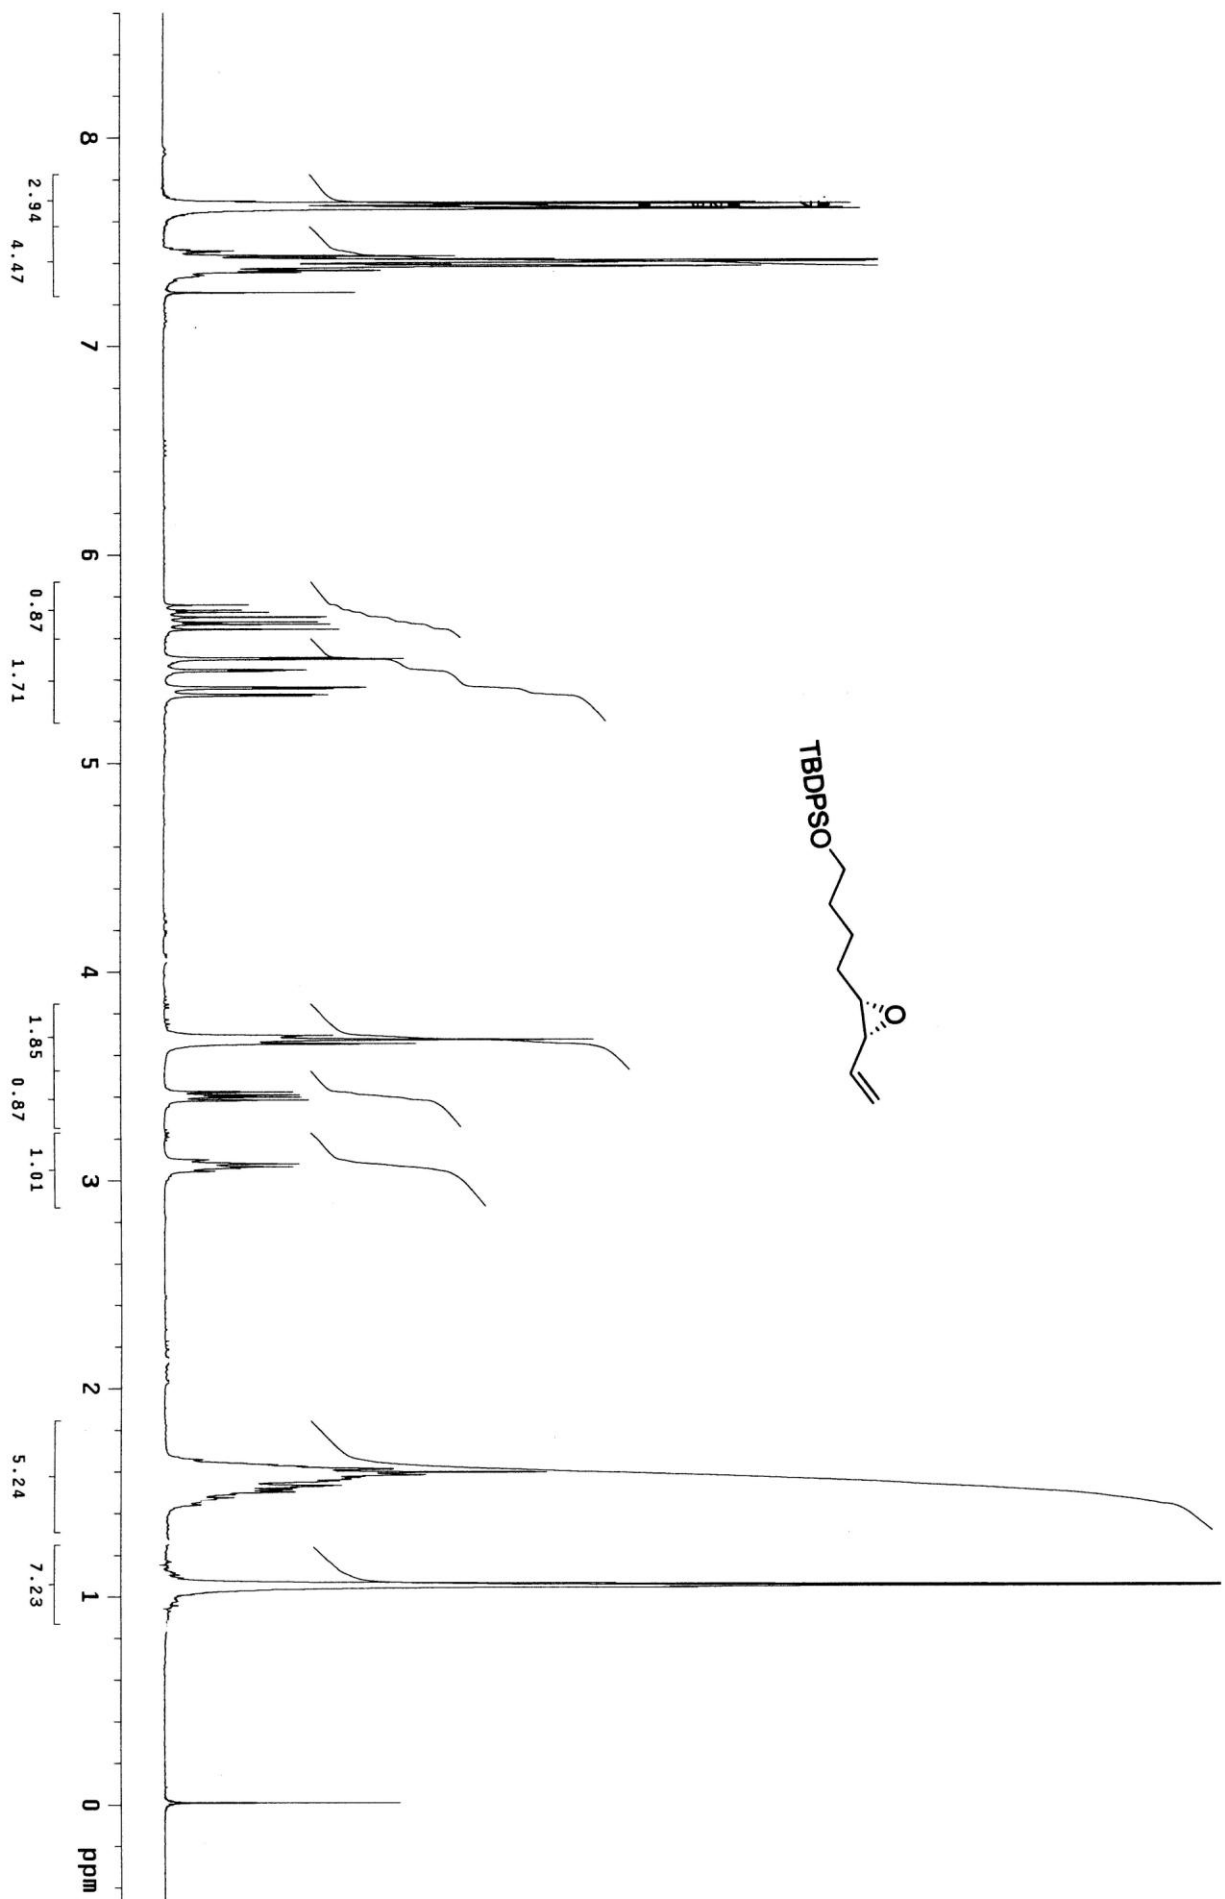

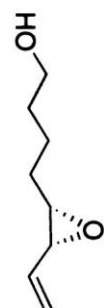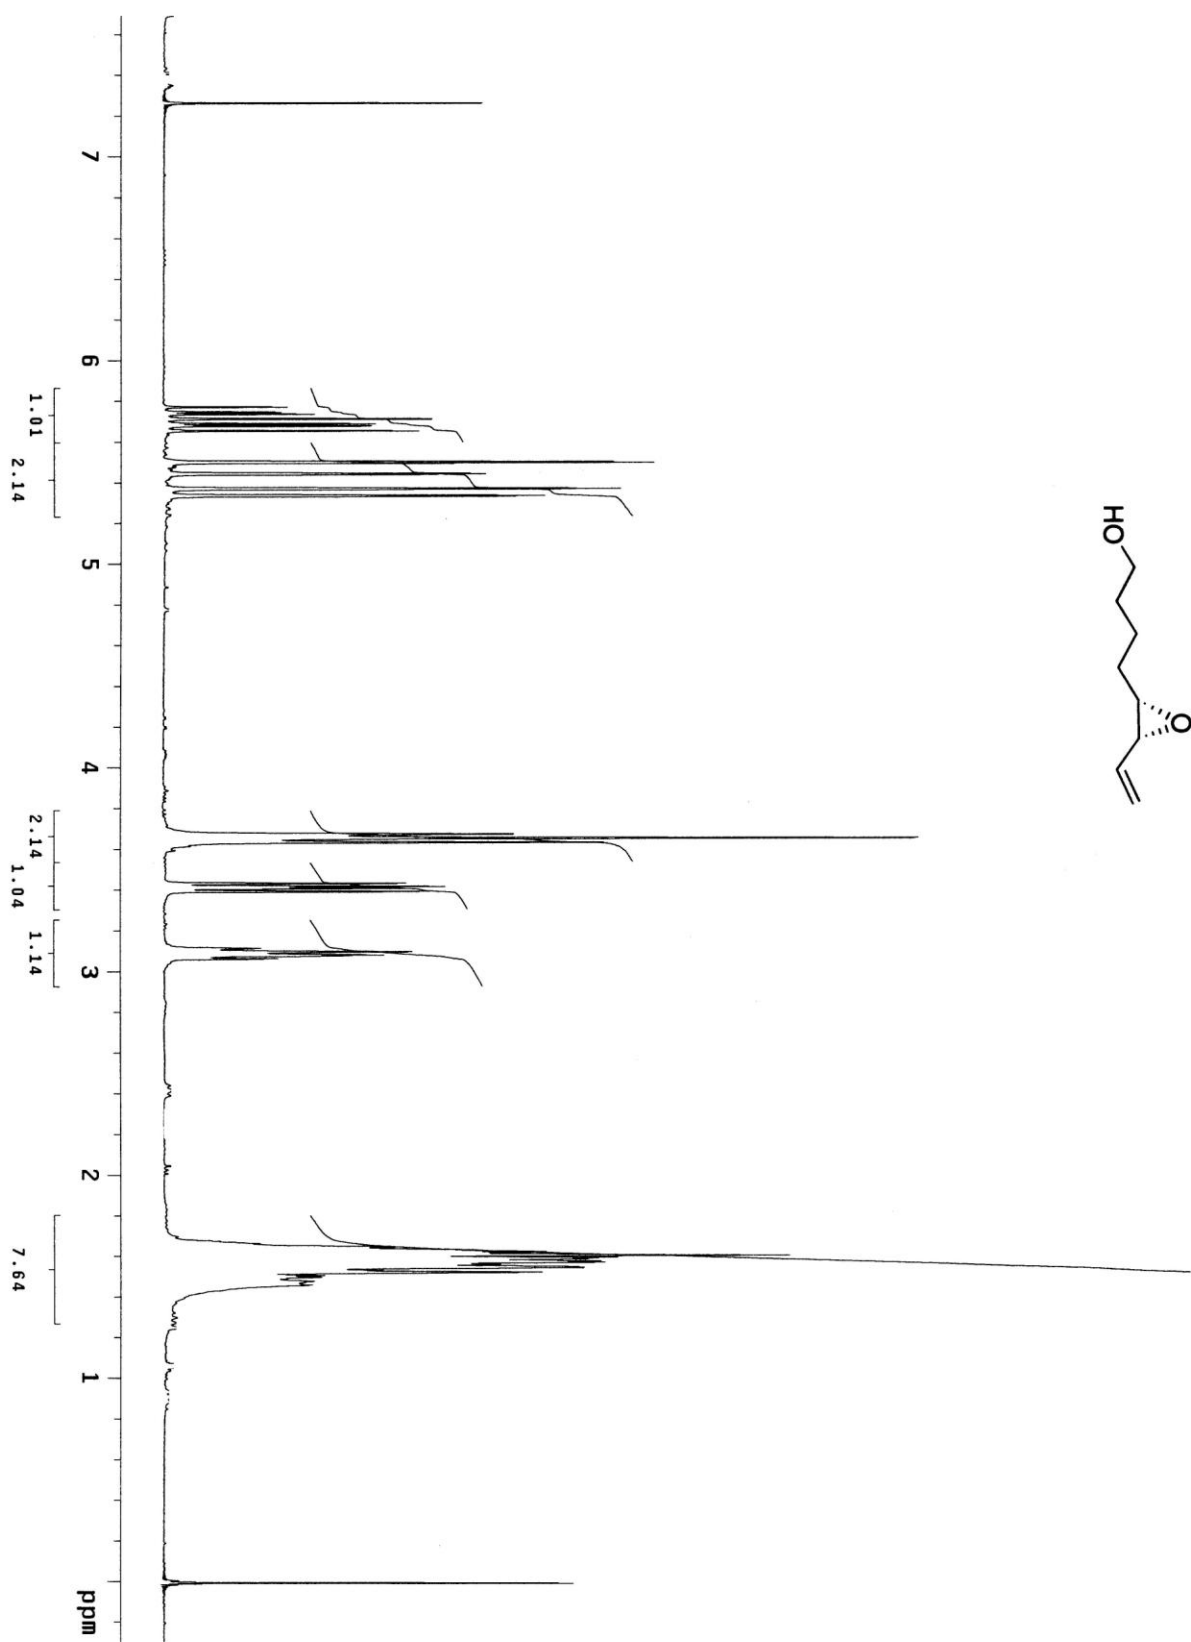

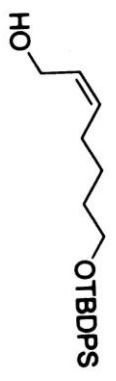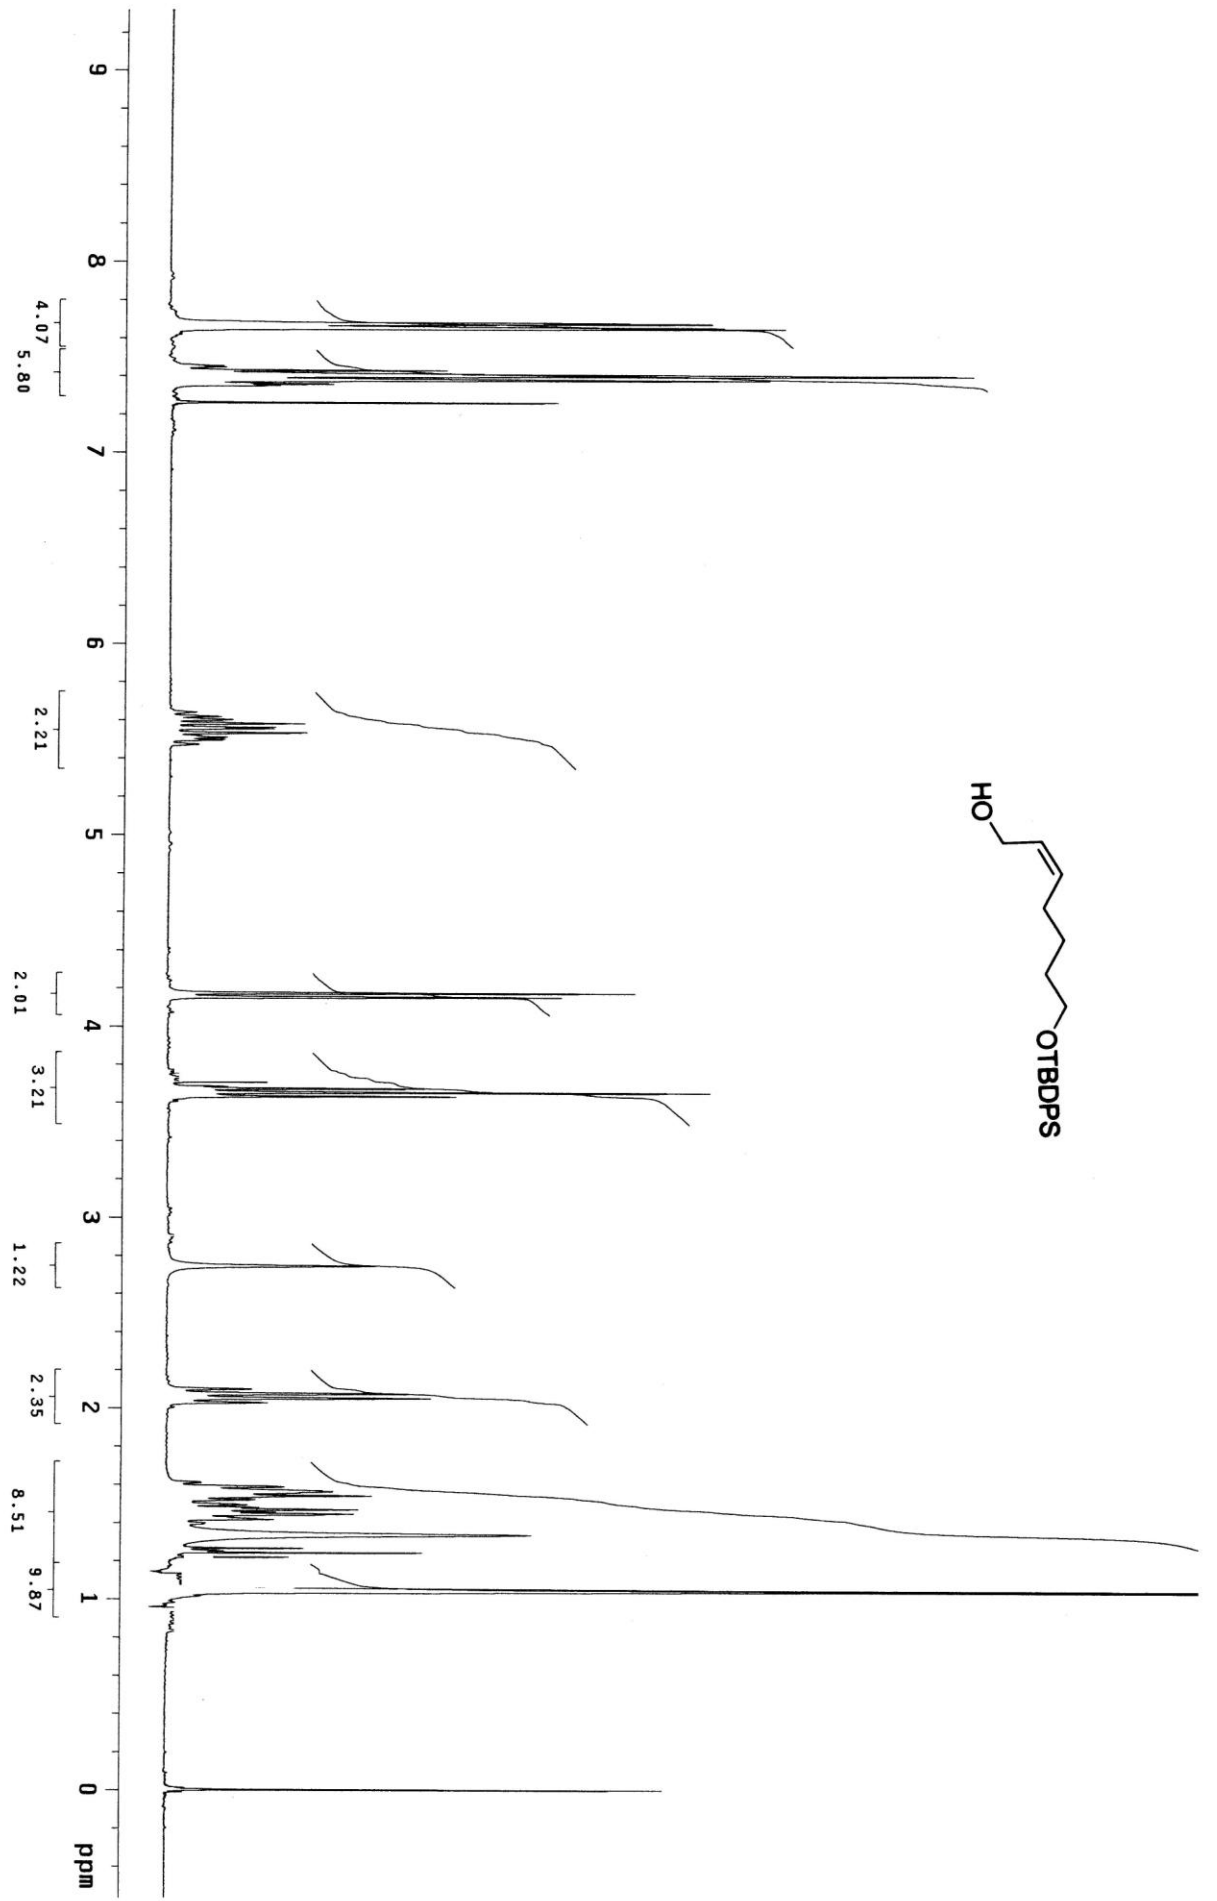

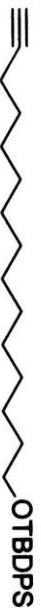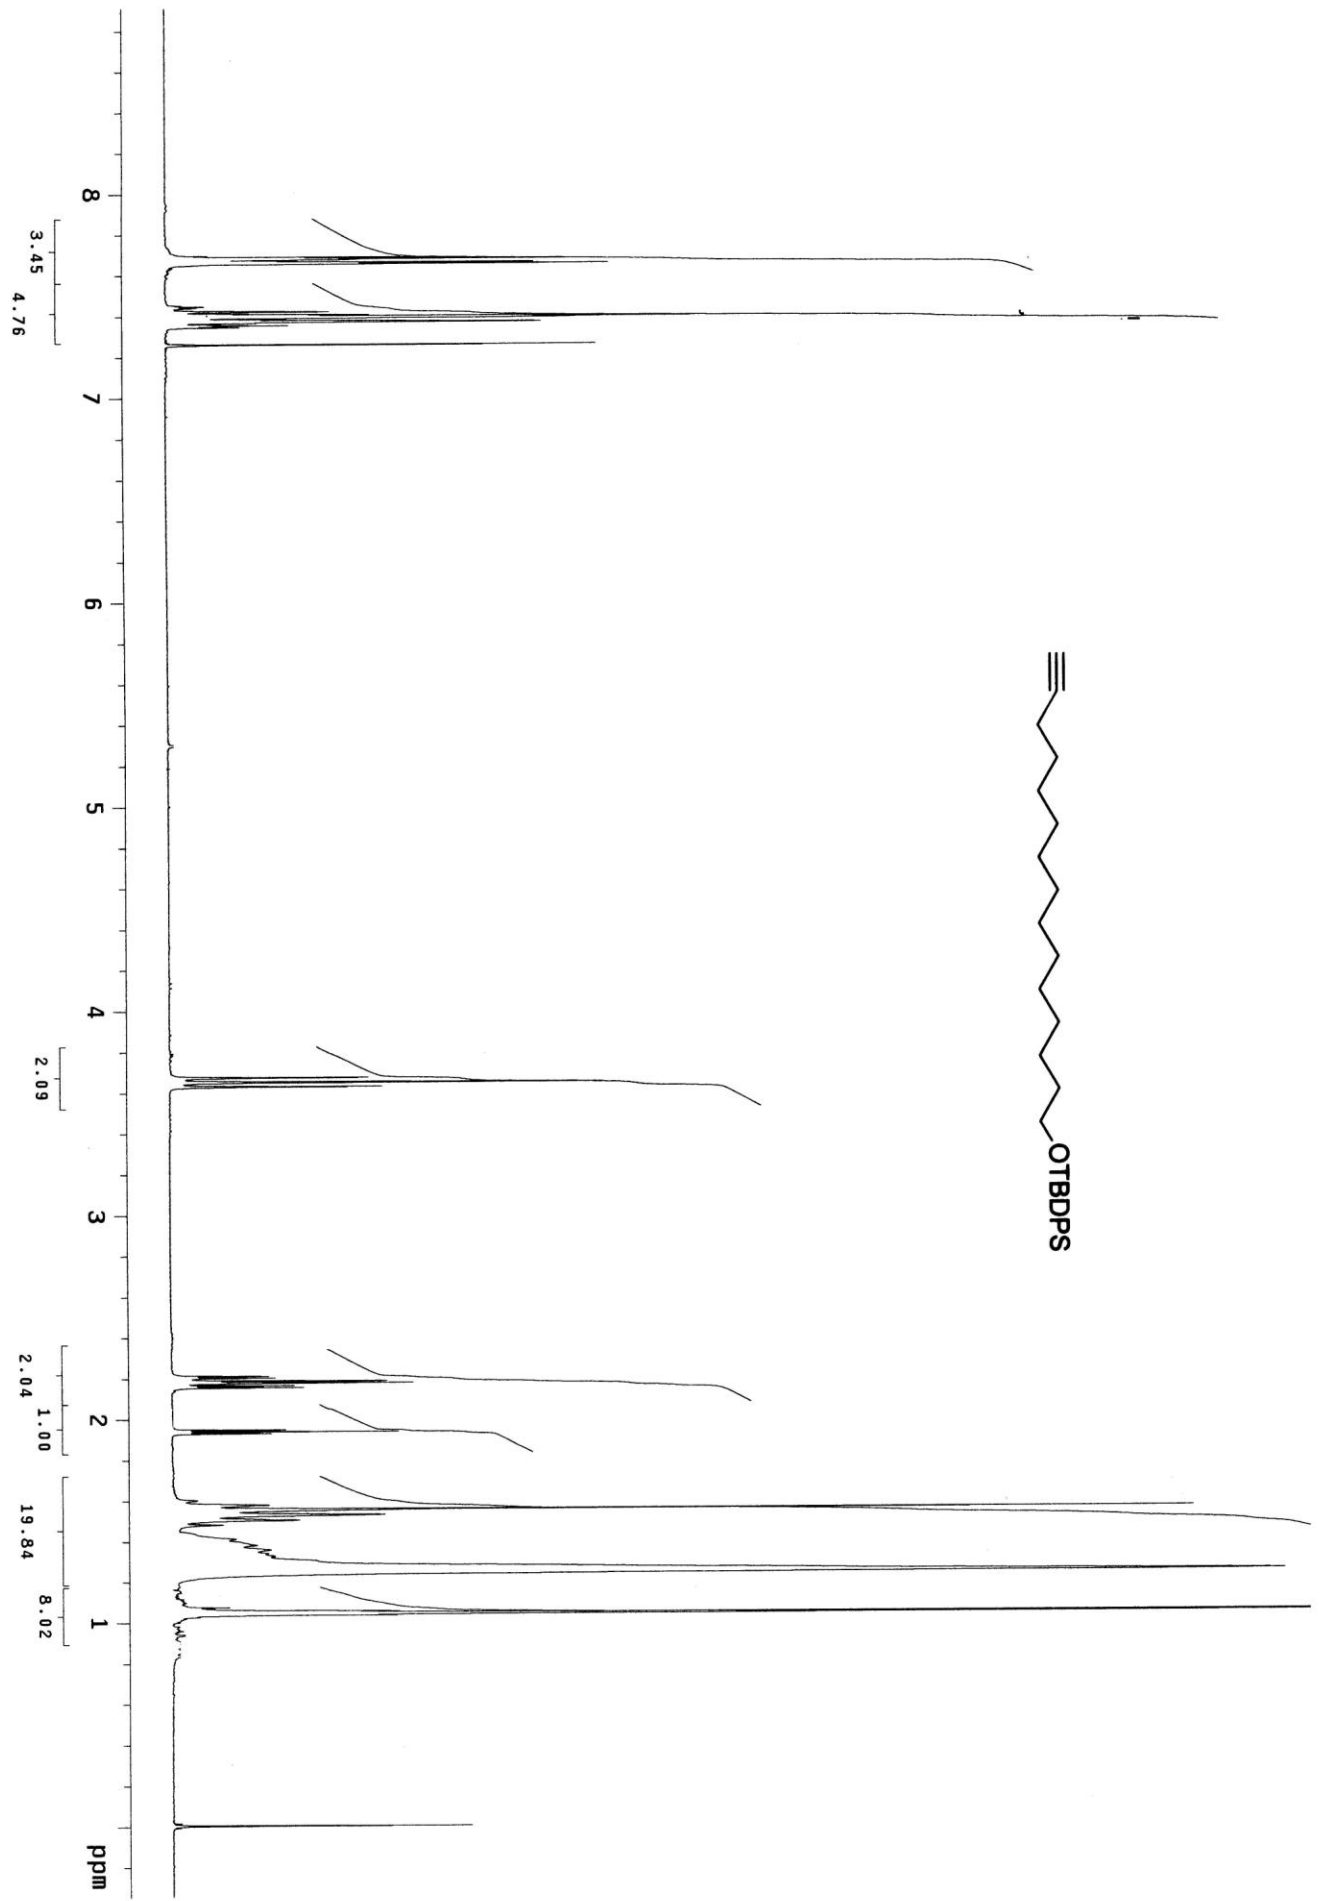

Supplement: NIHMS300734-supplement-2_si_002.pdf [file NIHMS300734-supplement-2_si_002.pdf]
